# Supplementary material
Source: Royal Society of Chemistry journal article supplement (doi:10.1039/d6ob00305b)
Supplement: d6ob00305b2.pdf [file d6ob00305b2.pdf]

# Investigations toward a Unified Reaction Pathway of Thermal and TBSOTf-Mediated Oxidopyrylium-Alkene (5 + 2) Cycloadditions

*Adam J. Youman,<sup>†</sup> Samantha N. Rokey,<sup>†</sup> Wentao Guo,<sup>†</sup> Jacob P. Grabowski, Susanna N. Angles, Jacob J. Bulandr, Qing Sun,  
John R. Goodell, Dean J. Tantillo,\* and T. Andrew Mitchell\**

Department of Chemistry, Illinois State University, Campus Box 4160, Normal, IL 61790-4160; [mitchell@ilstu.edu](mailto:mitchell@ilstu.edu)

Department of Chemistry, University of California, Davis, 1 Shields Avenue, Davis, CA 95616; [djtantillo@ucdavis.edu](mailto:djtantillo@ucdavis.edu)

**Supporting Information – Spectra**

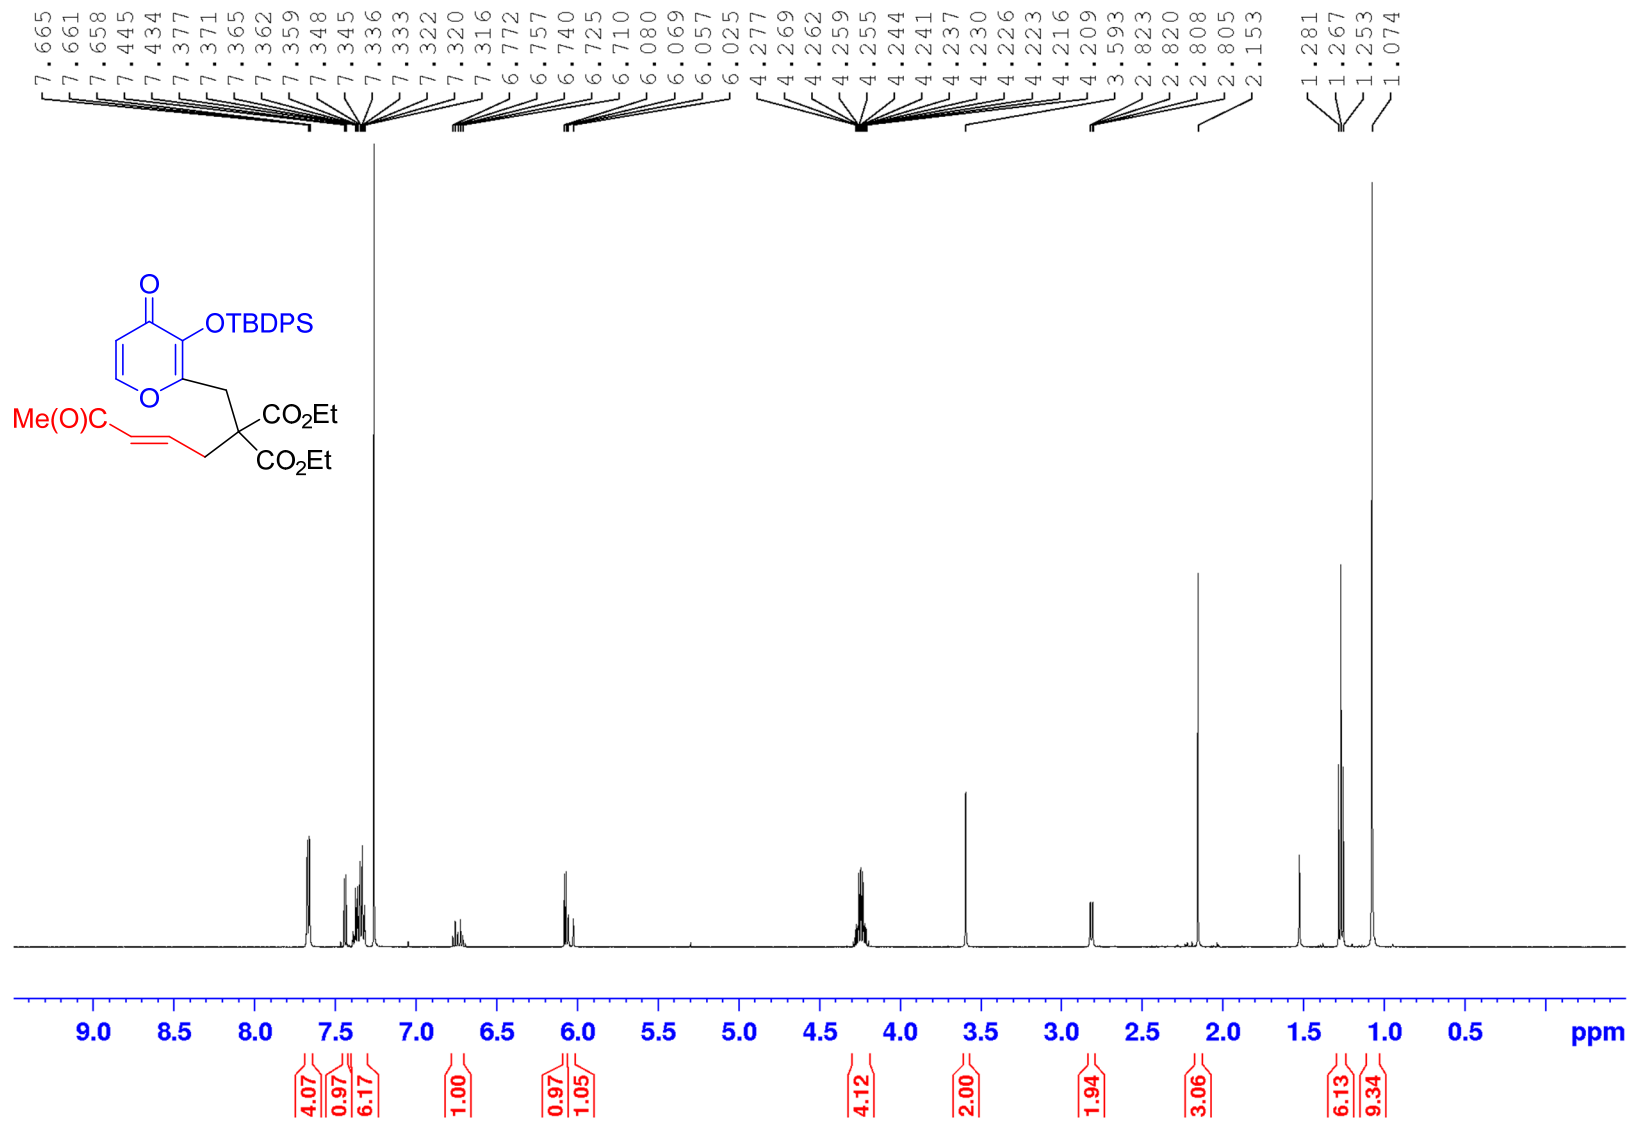

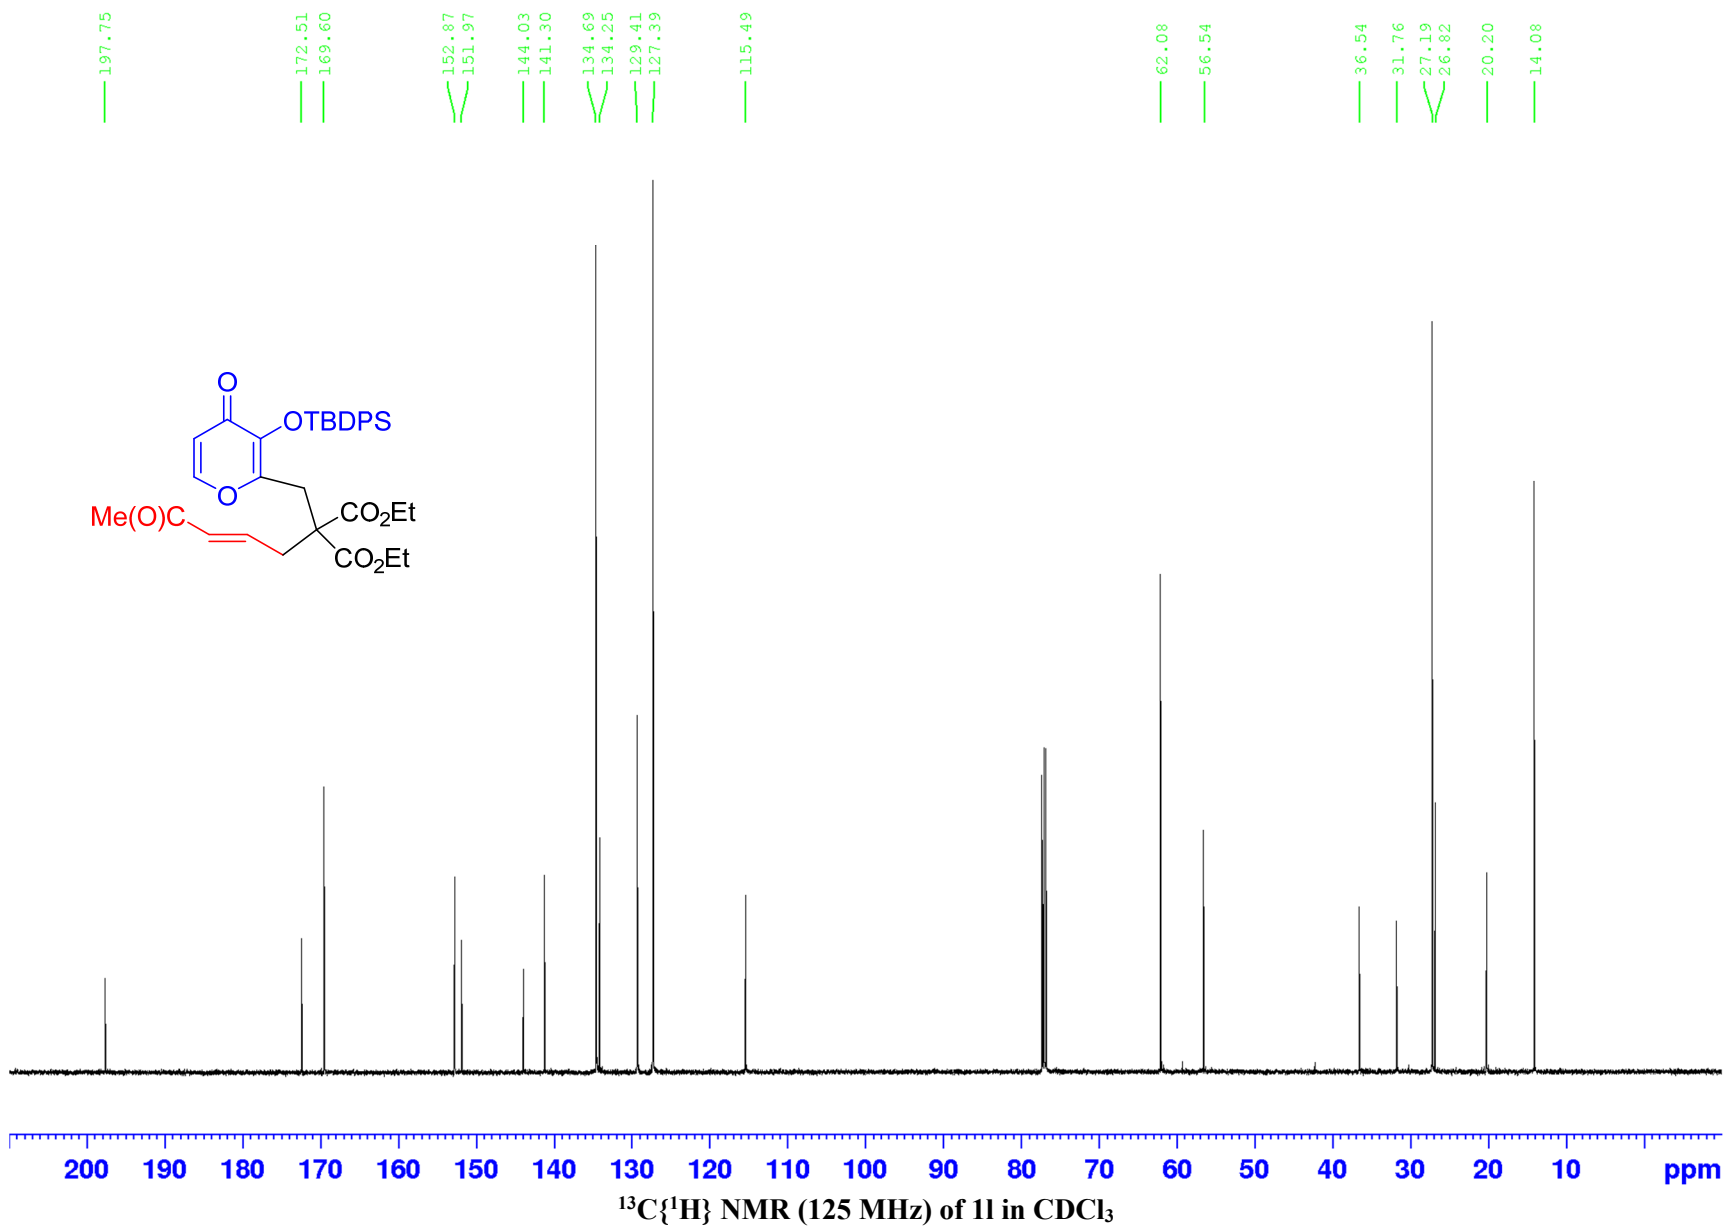

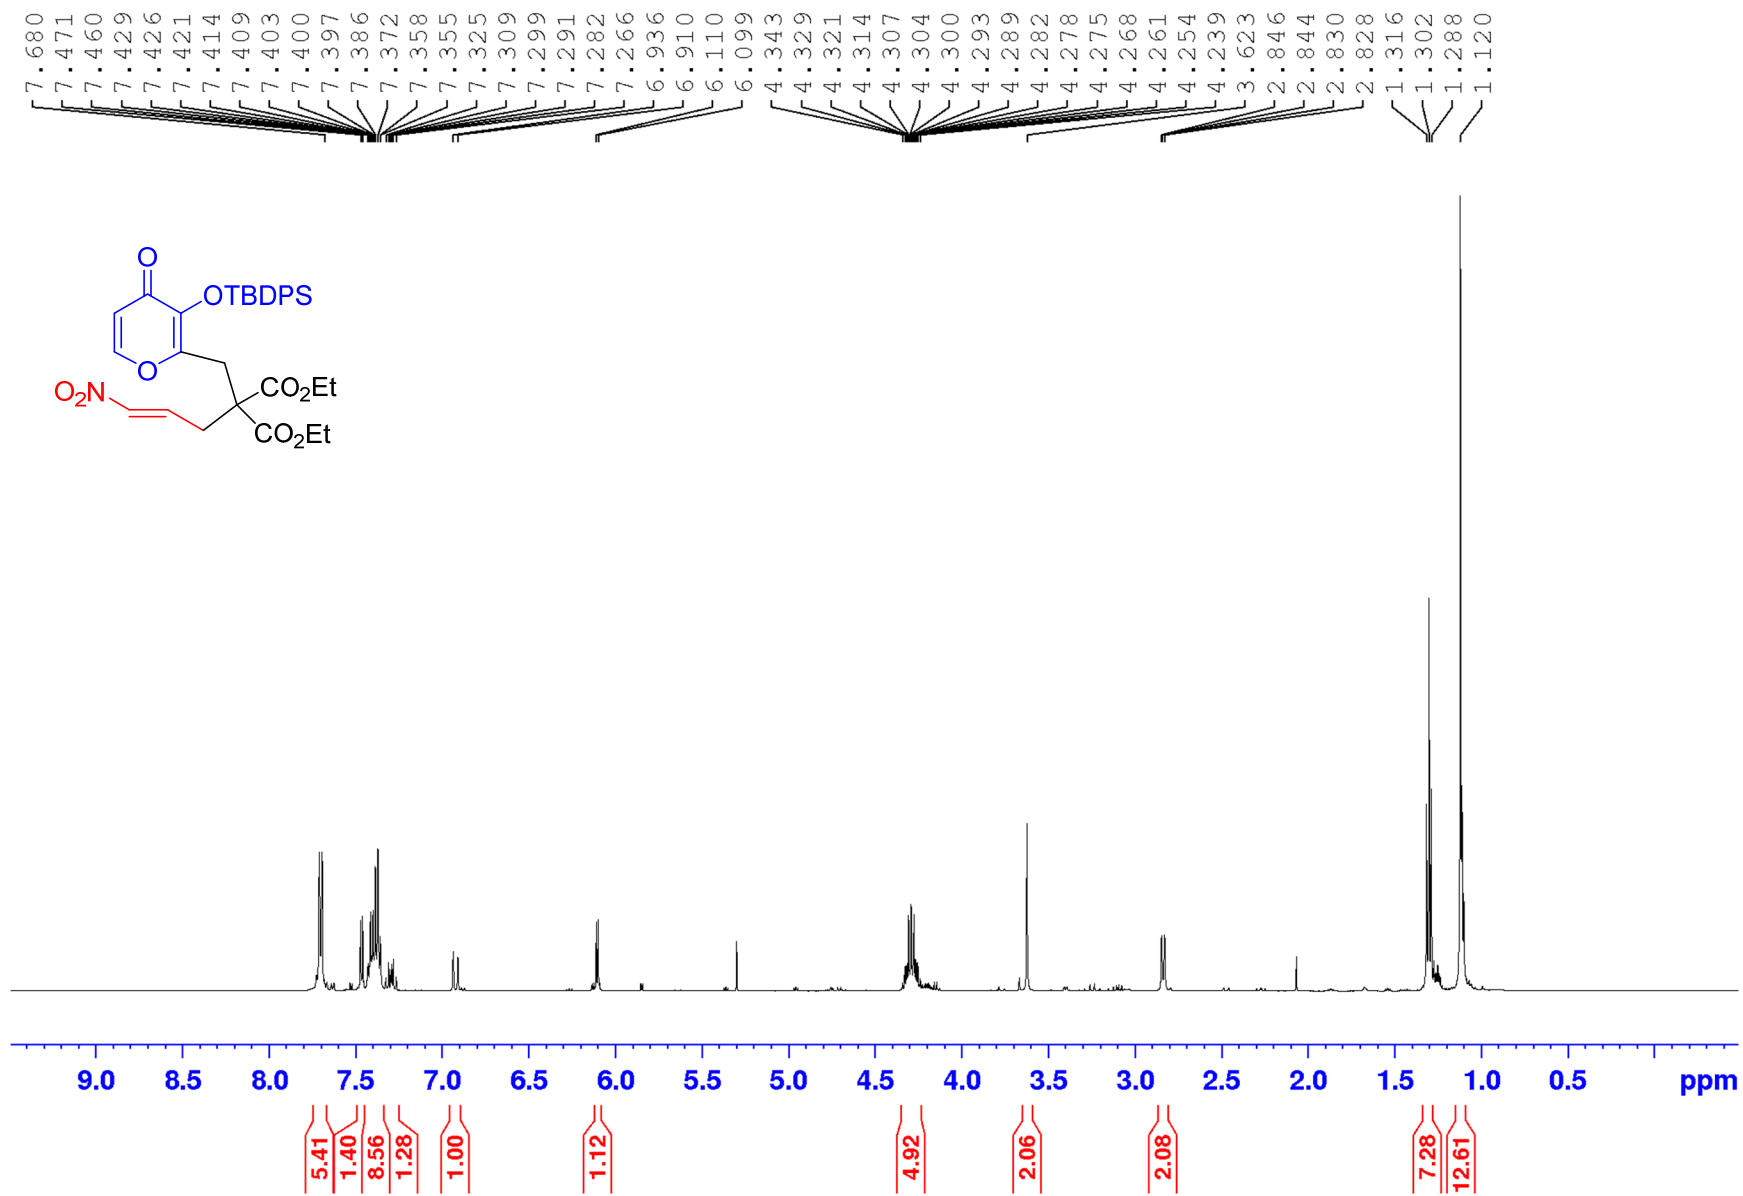

<sup>1</sup>H NMR (500 MHz) of 1n in CDCl<sub>3</sub>

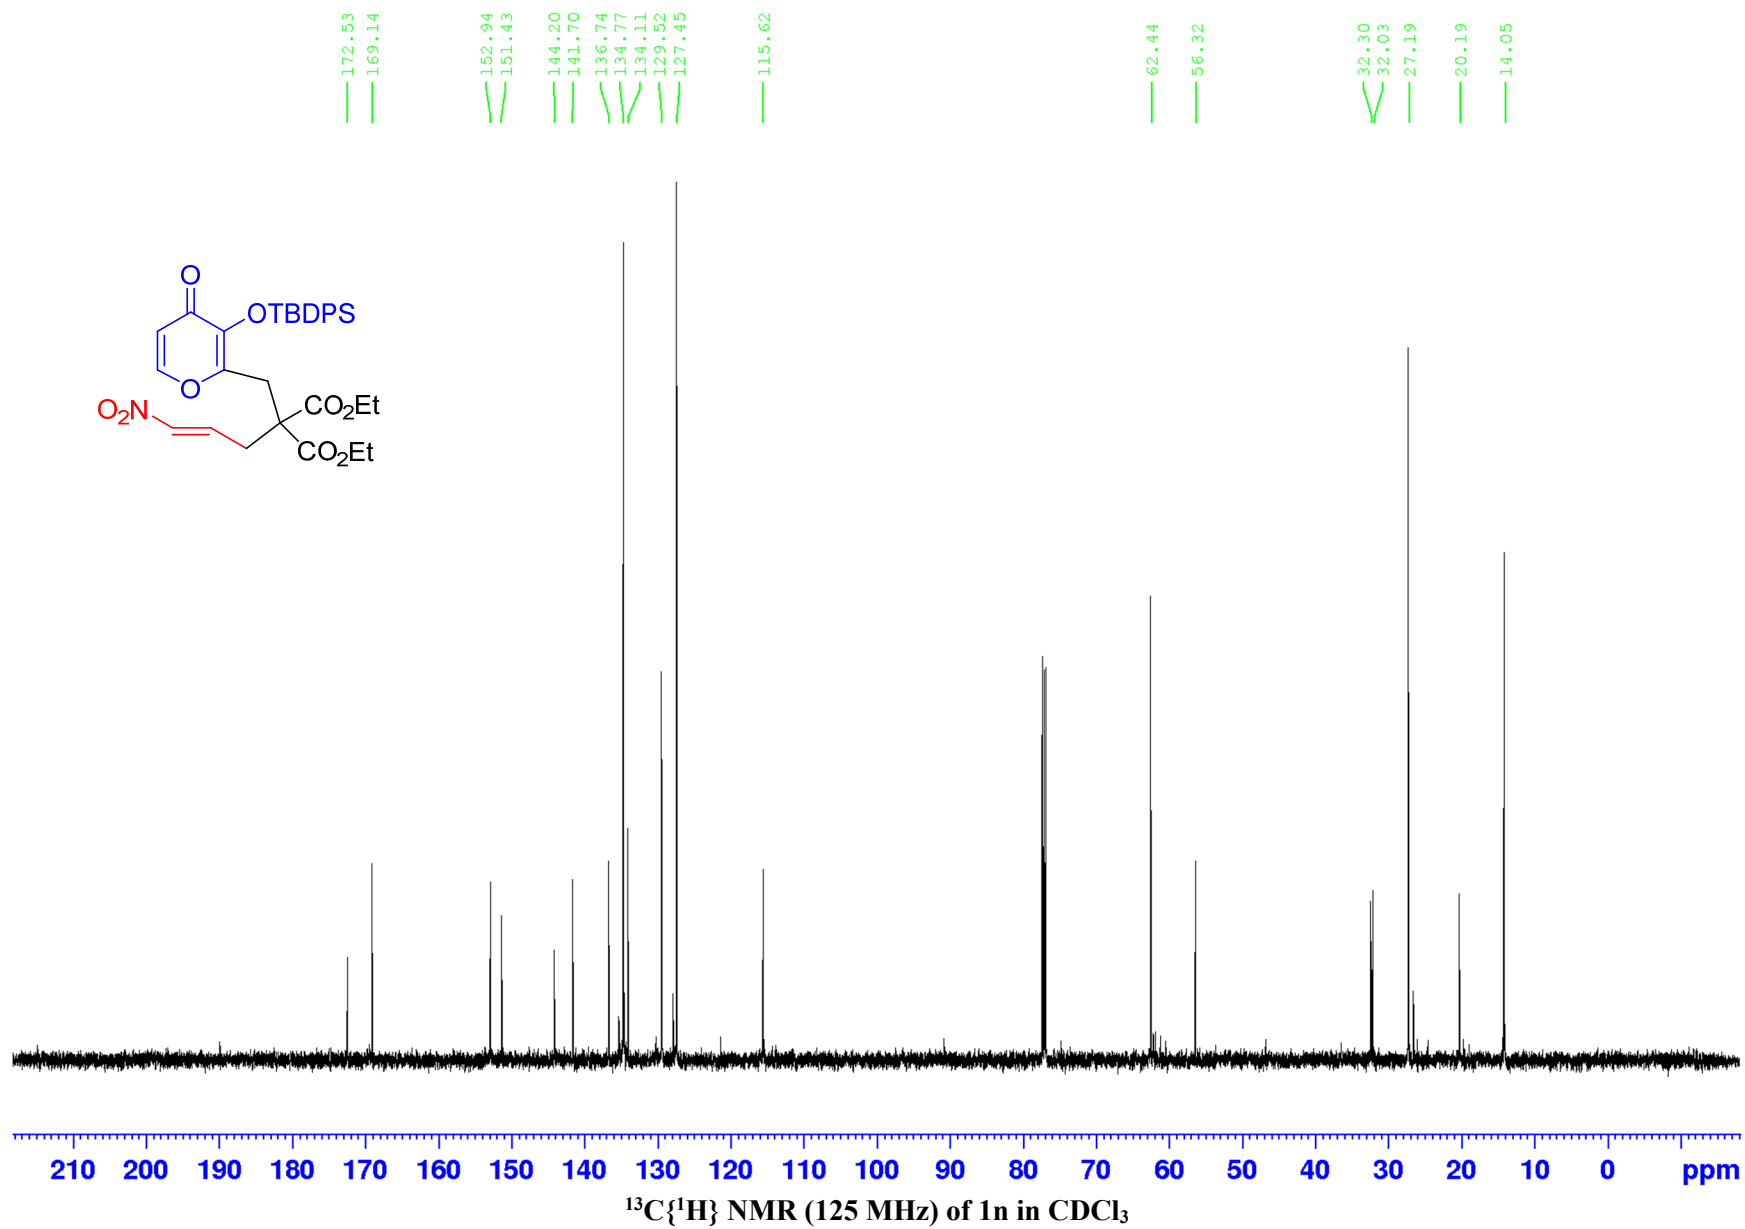

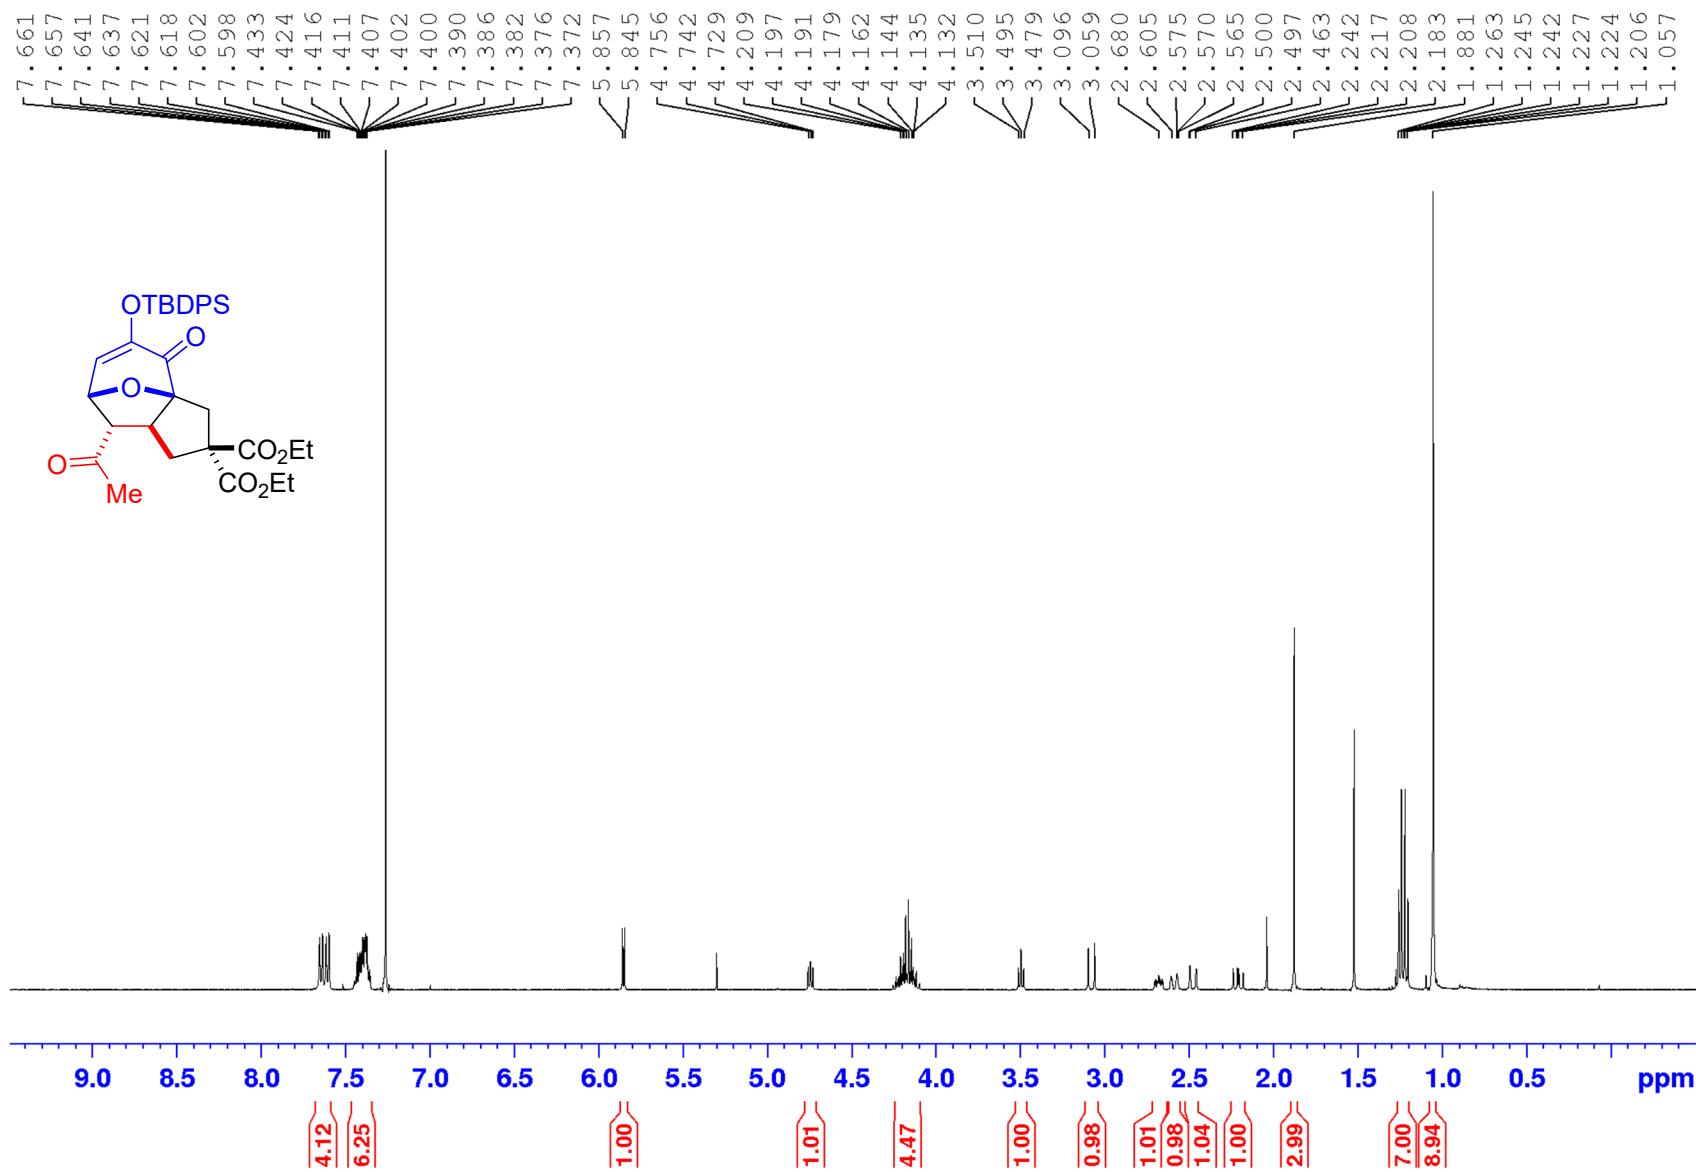

<sup>1</sup>H NMR (500 MHz) of 21 in CDCl<sub>3</sub>

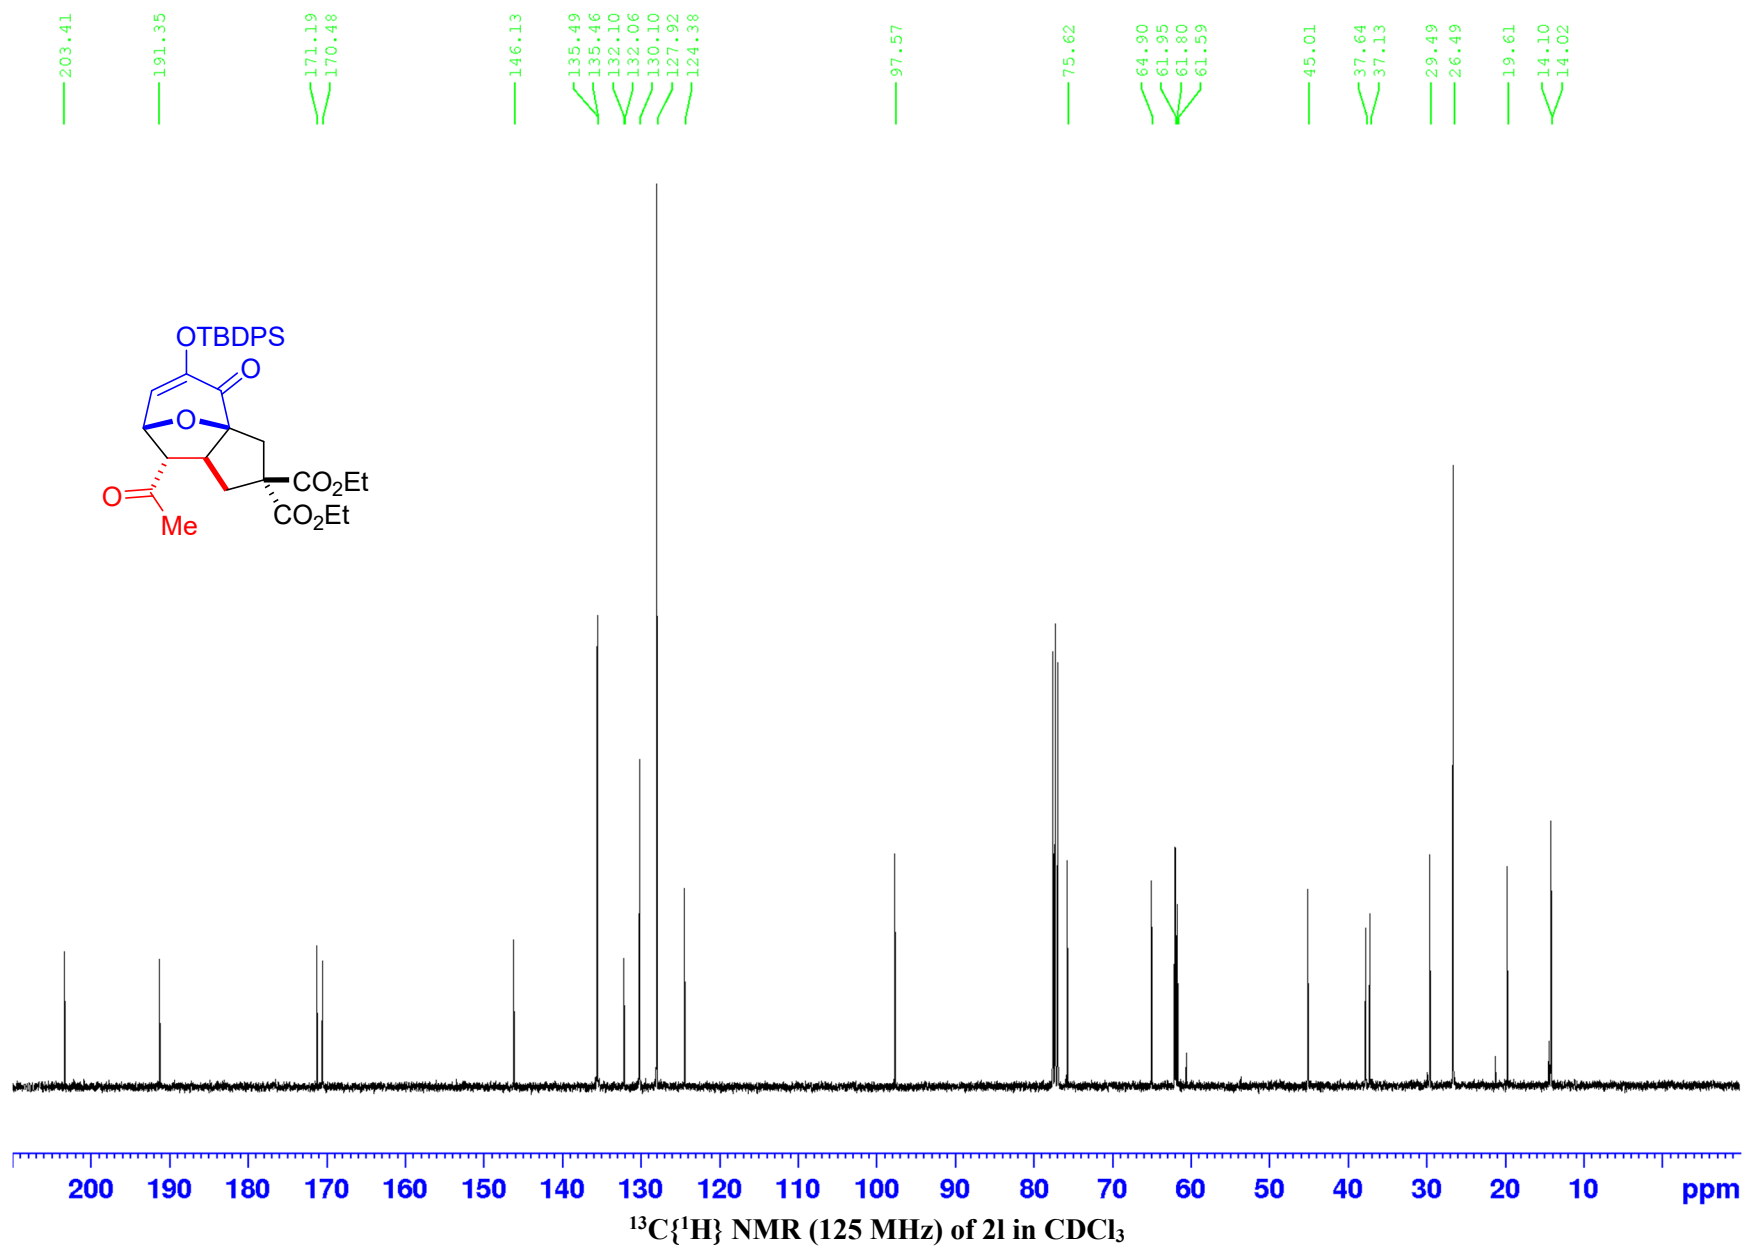

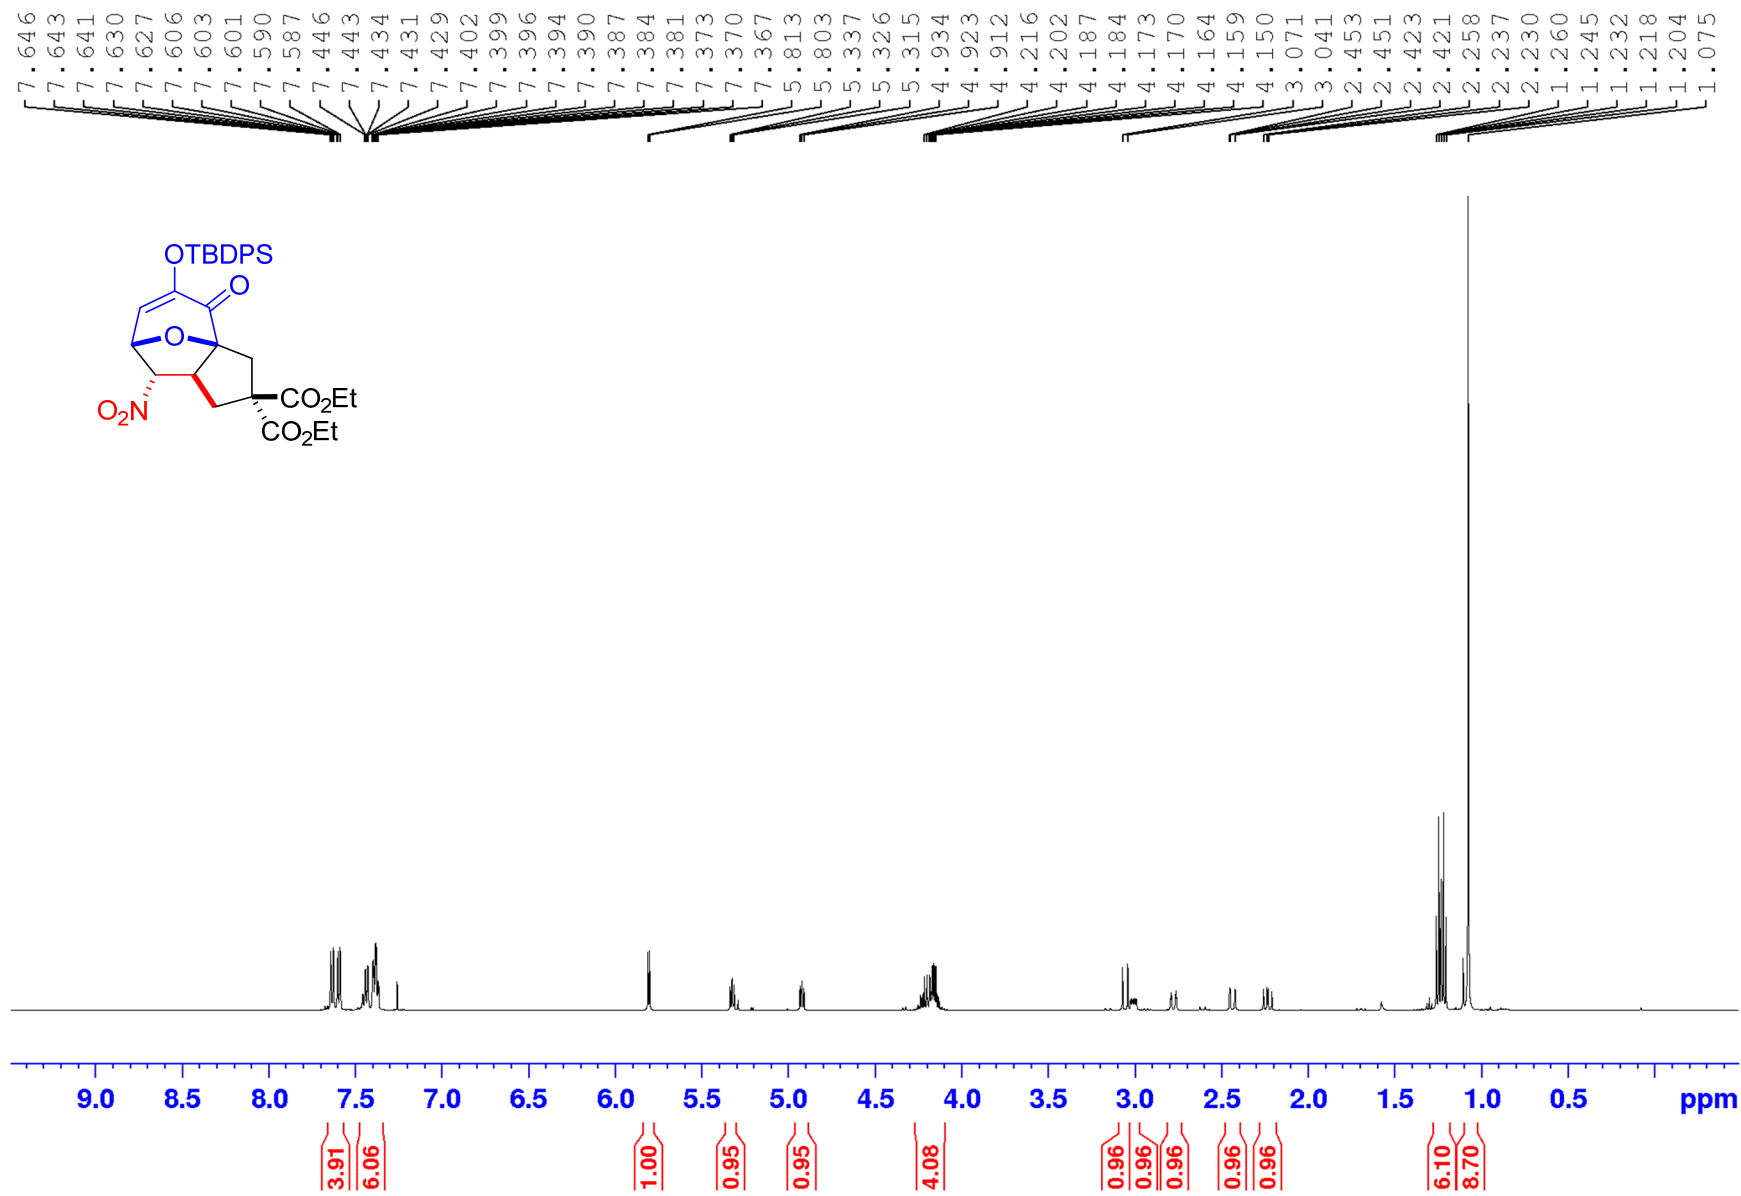

<sup>1</sup>H NMR (500 MHz) of 2n in CDCl<sub>3</sub>

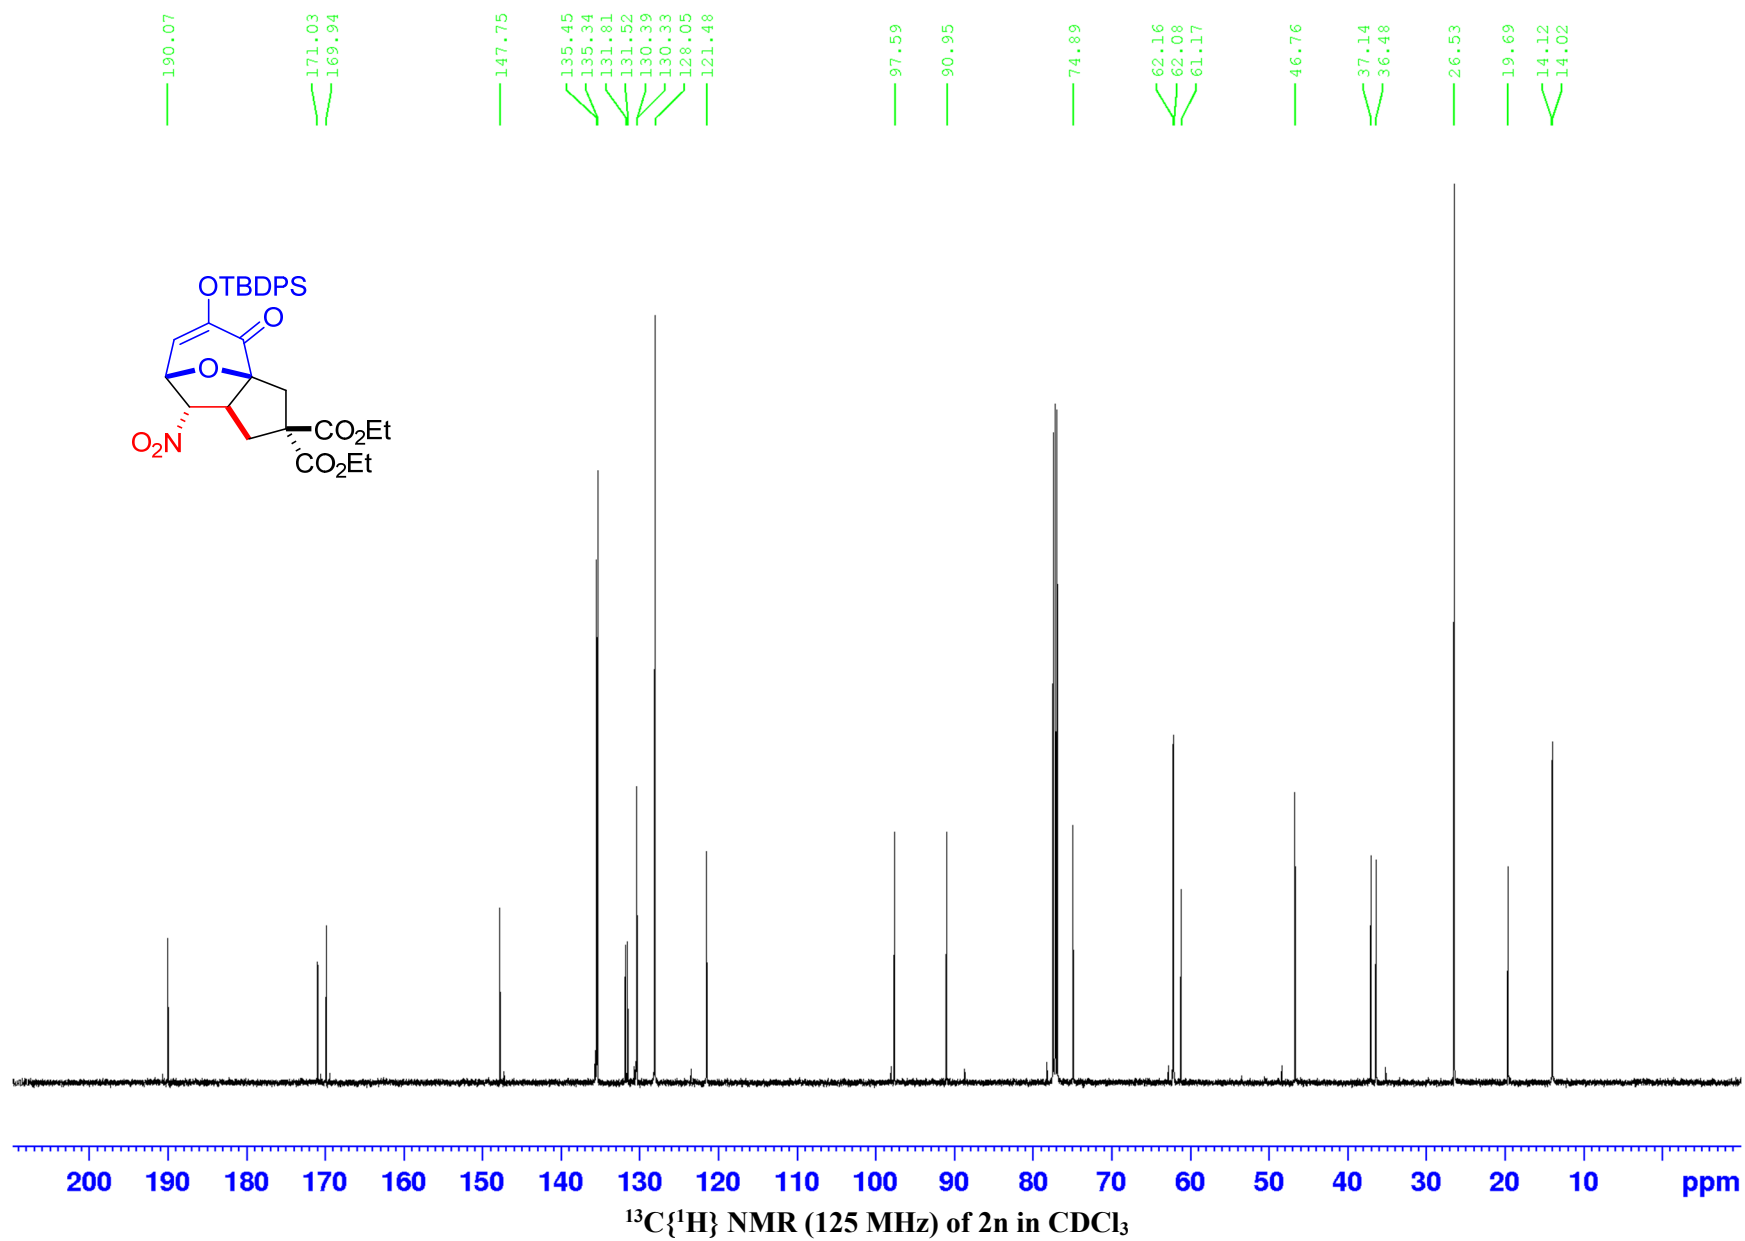

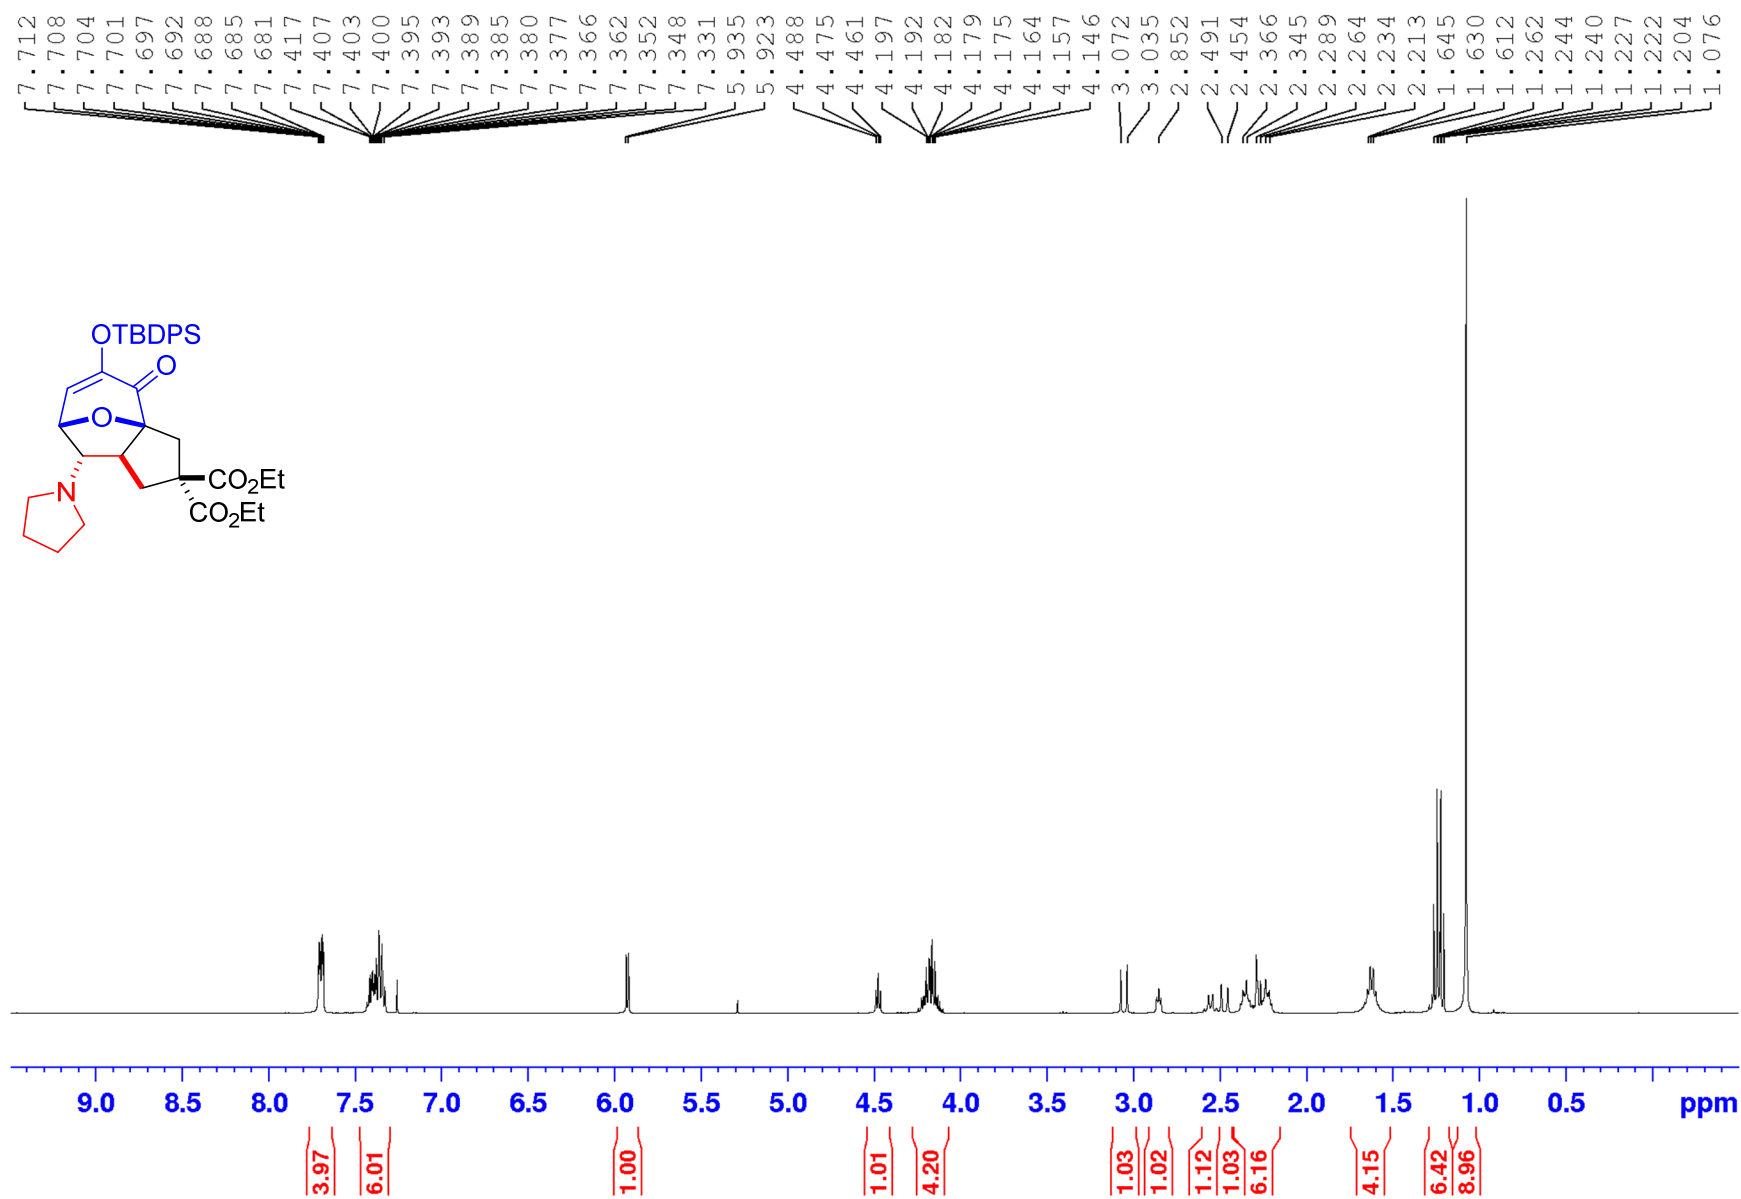

<sup>1</sup>H NMR (400 MHz) of 2p in CDCl<sub>3</sub>

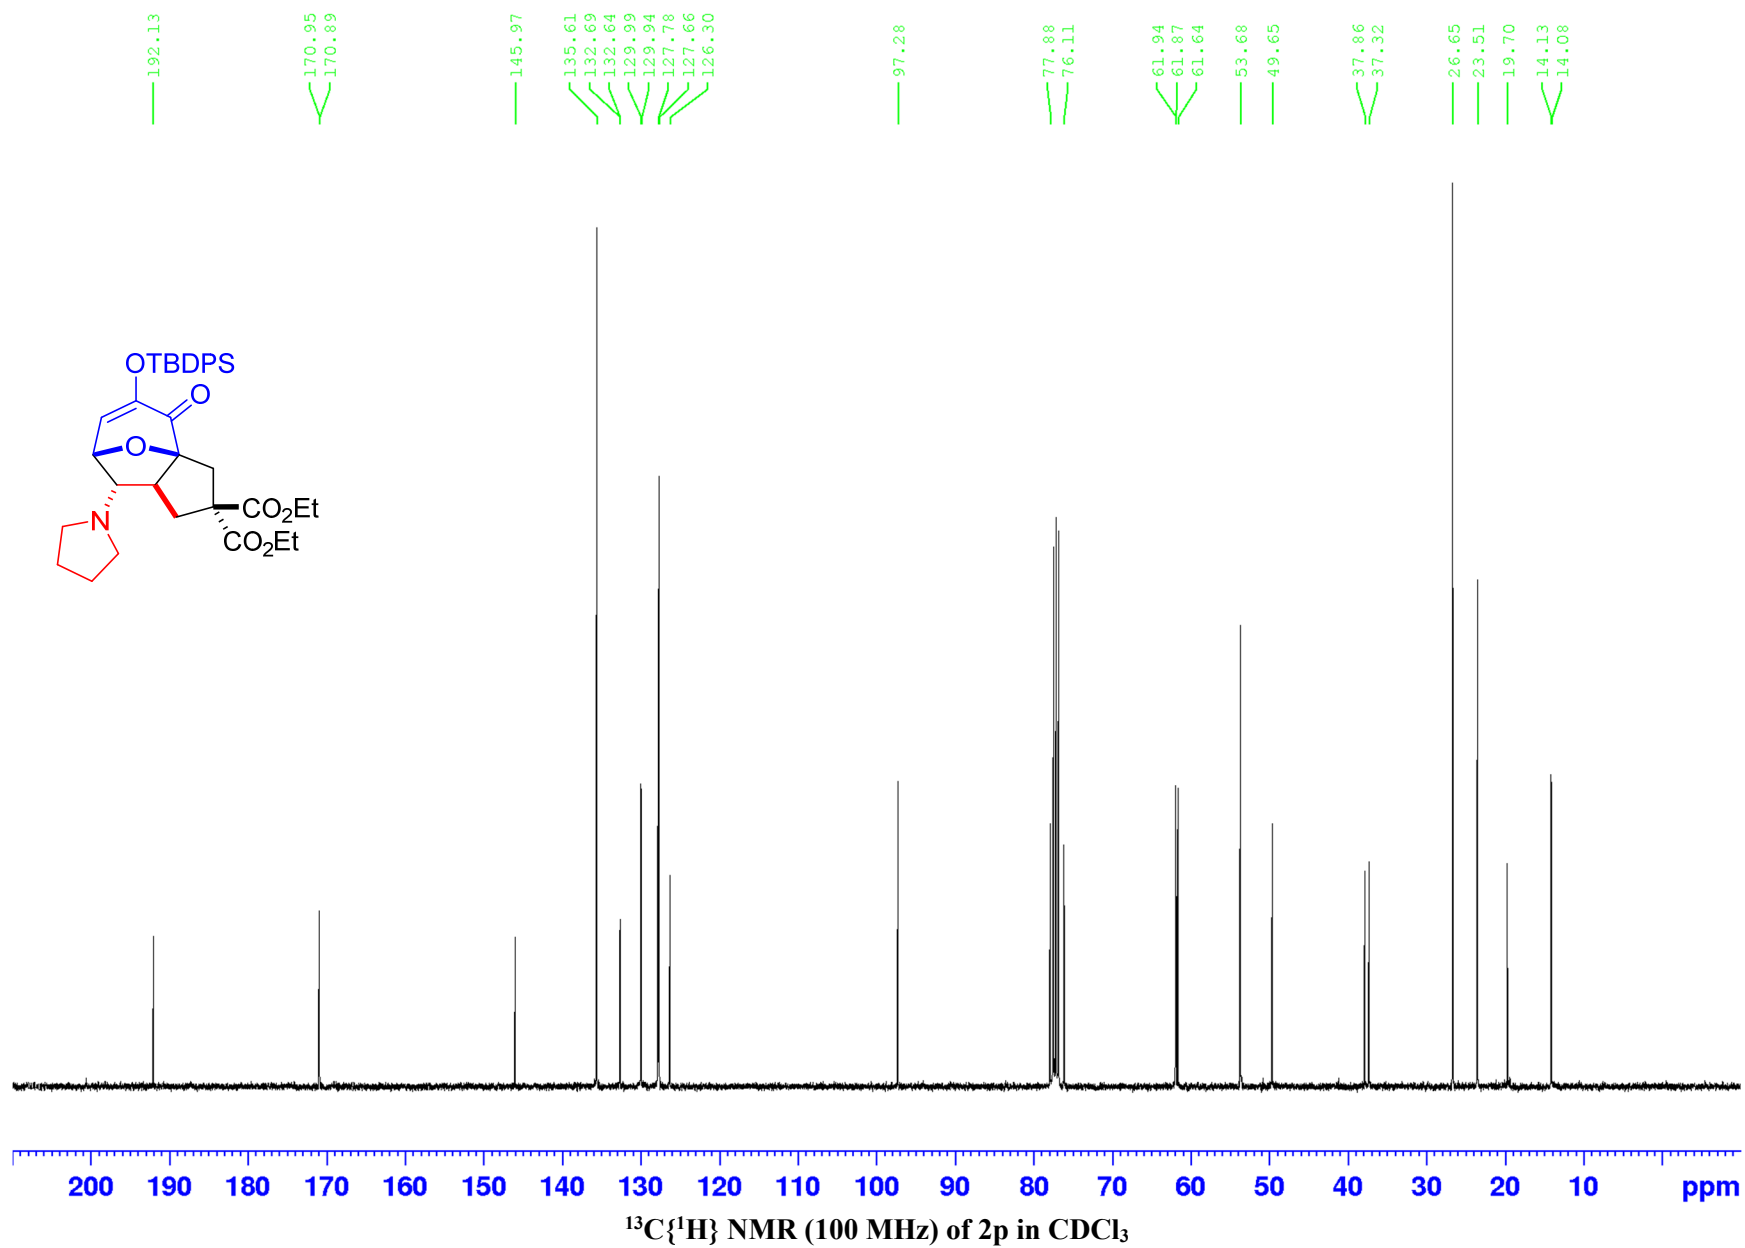

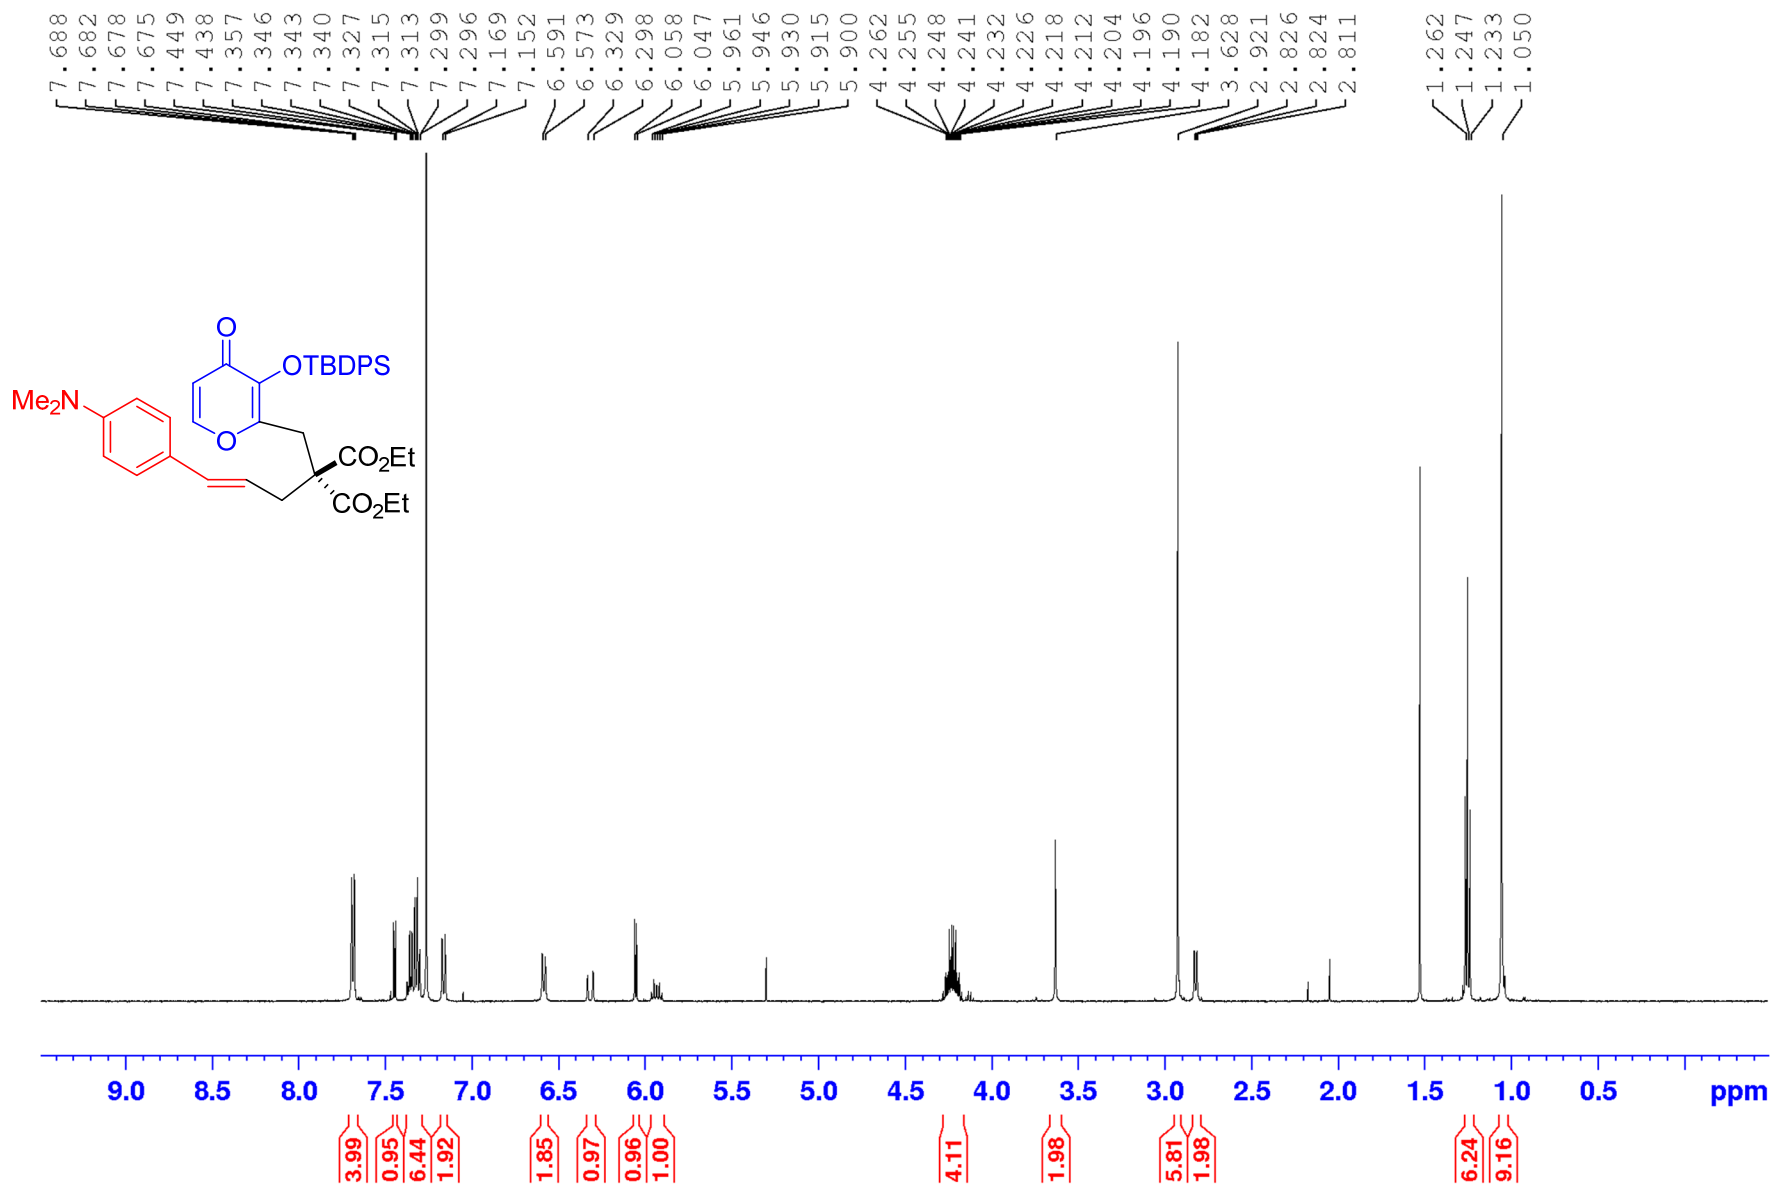

<sup>1</sup>H NMR (500 MHz) of 1q' in CDCl<sub>3</sub>

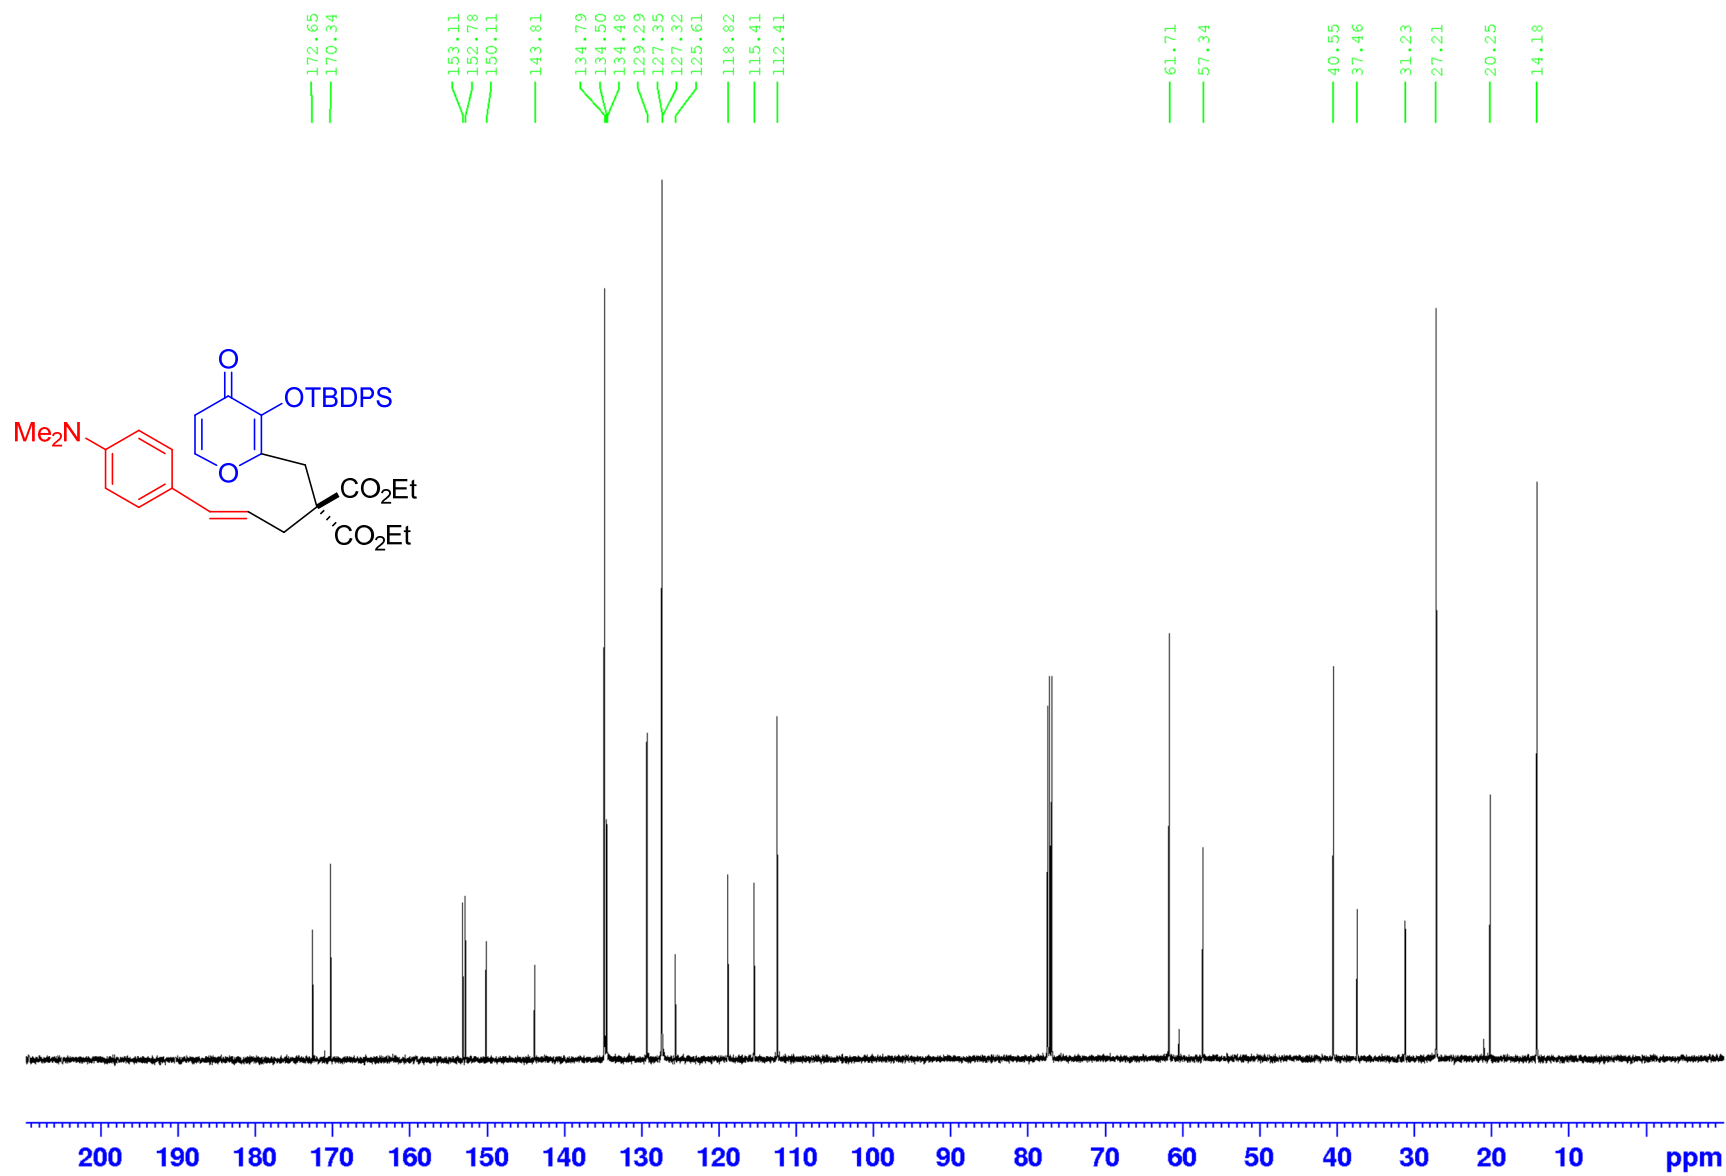

<sup>13</sup>C{<sup>1</sup>H} NMR (125 MHz) of 1q' in CDCl<sub>3</sub>

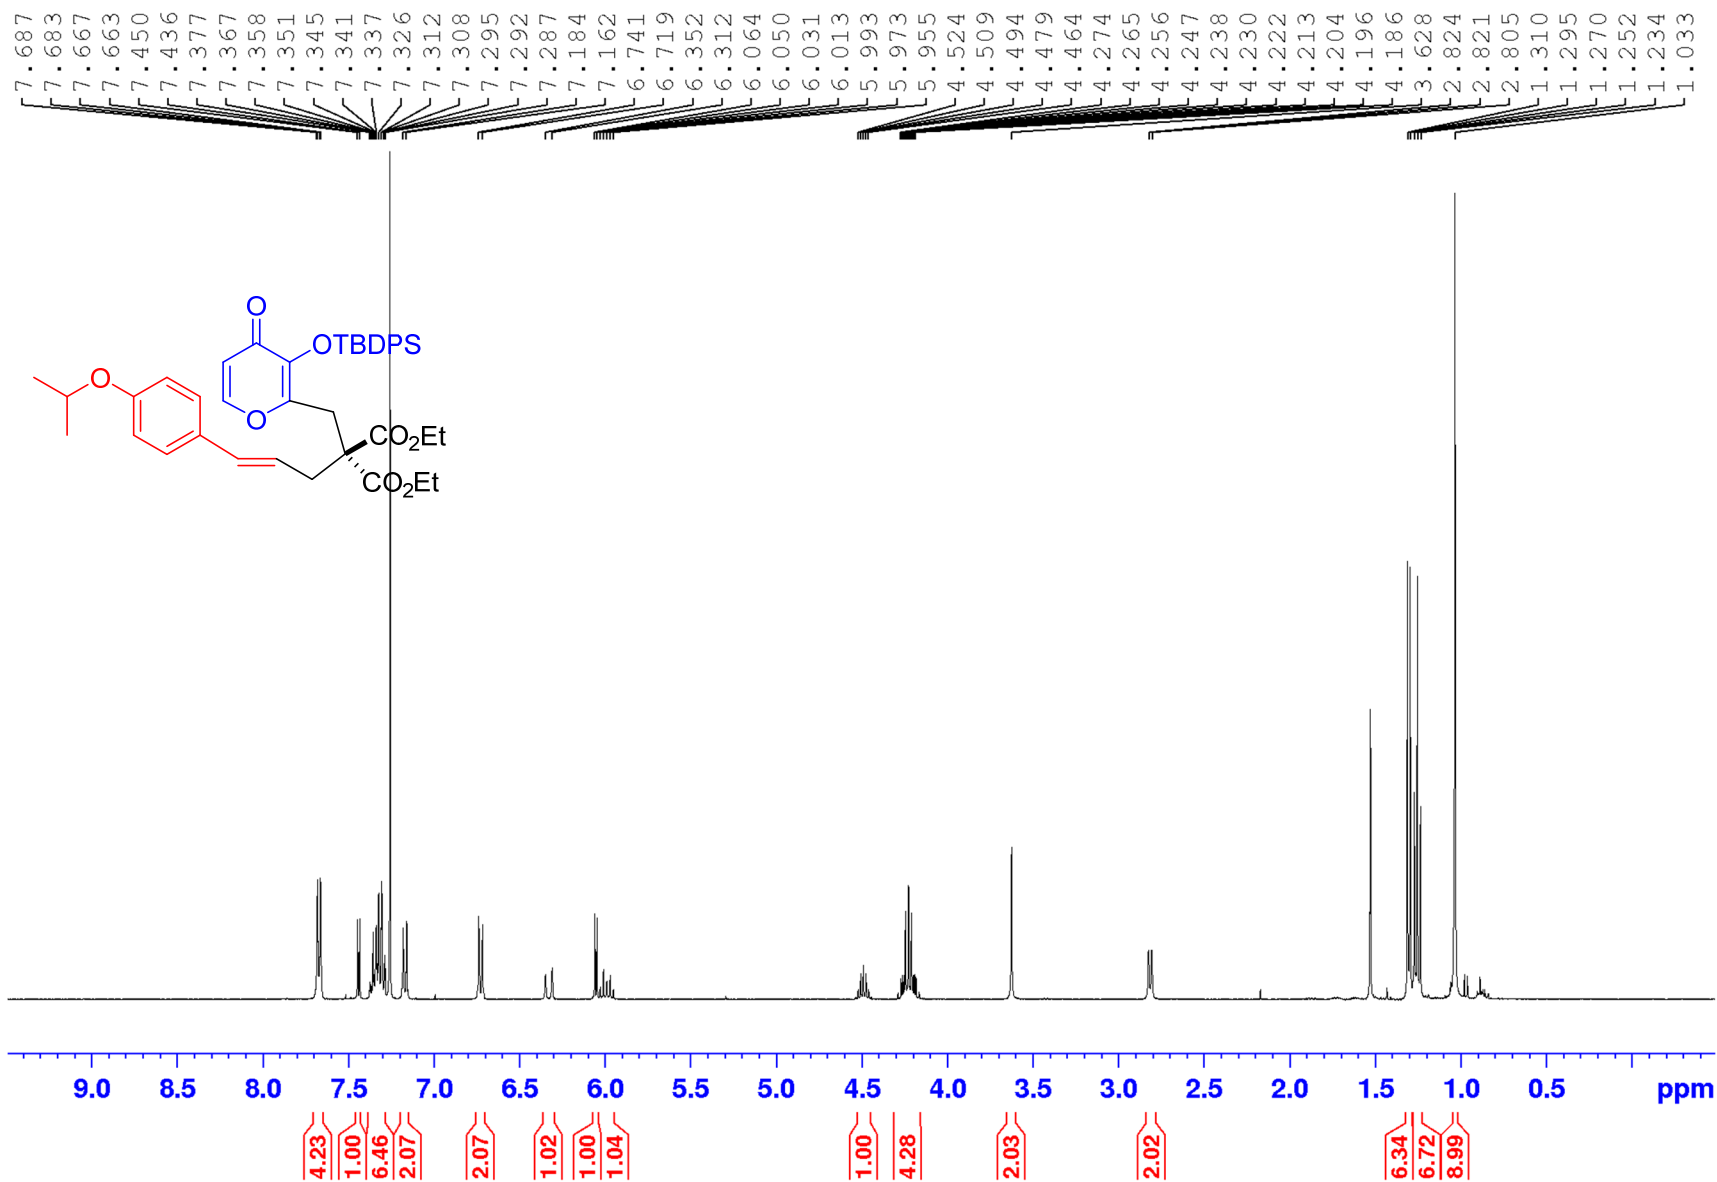

<sup>1</sup>H NMR (400 MHz) of 1r' in CDCl<sub>3</sub>

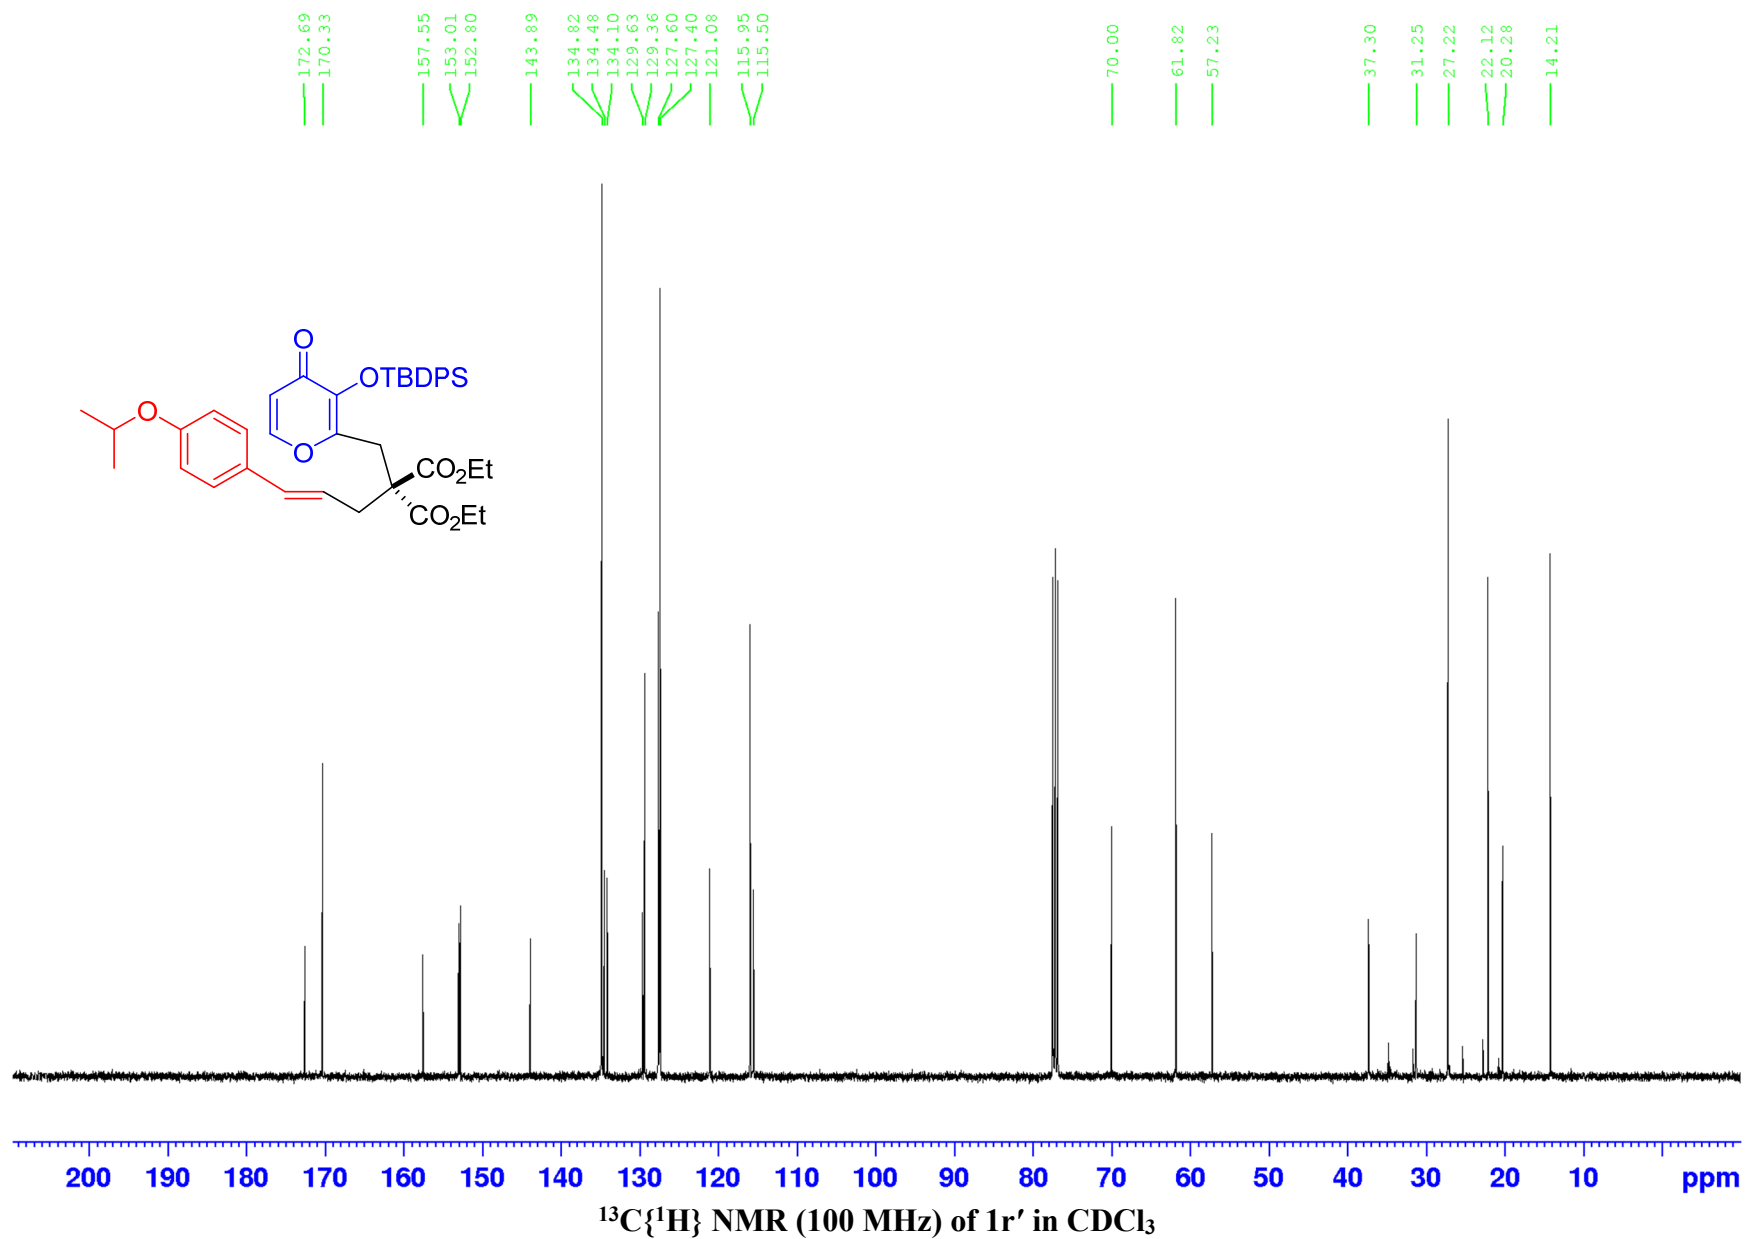

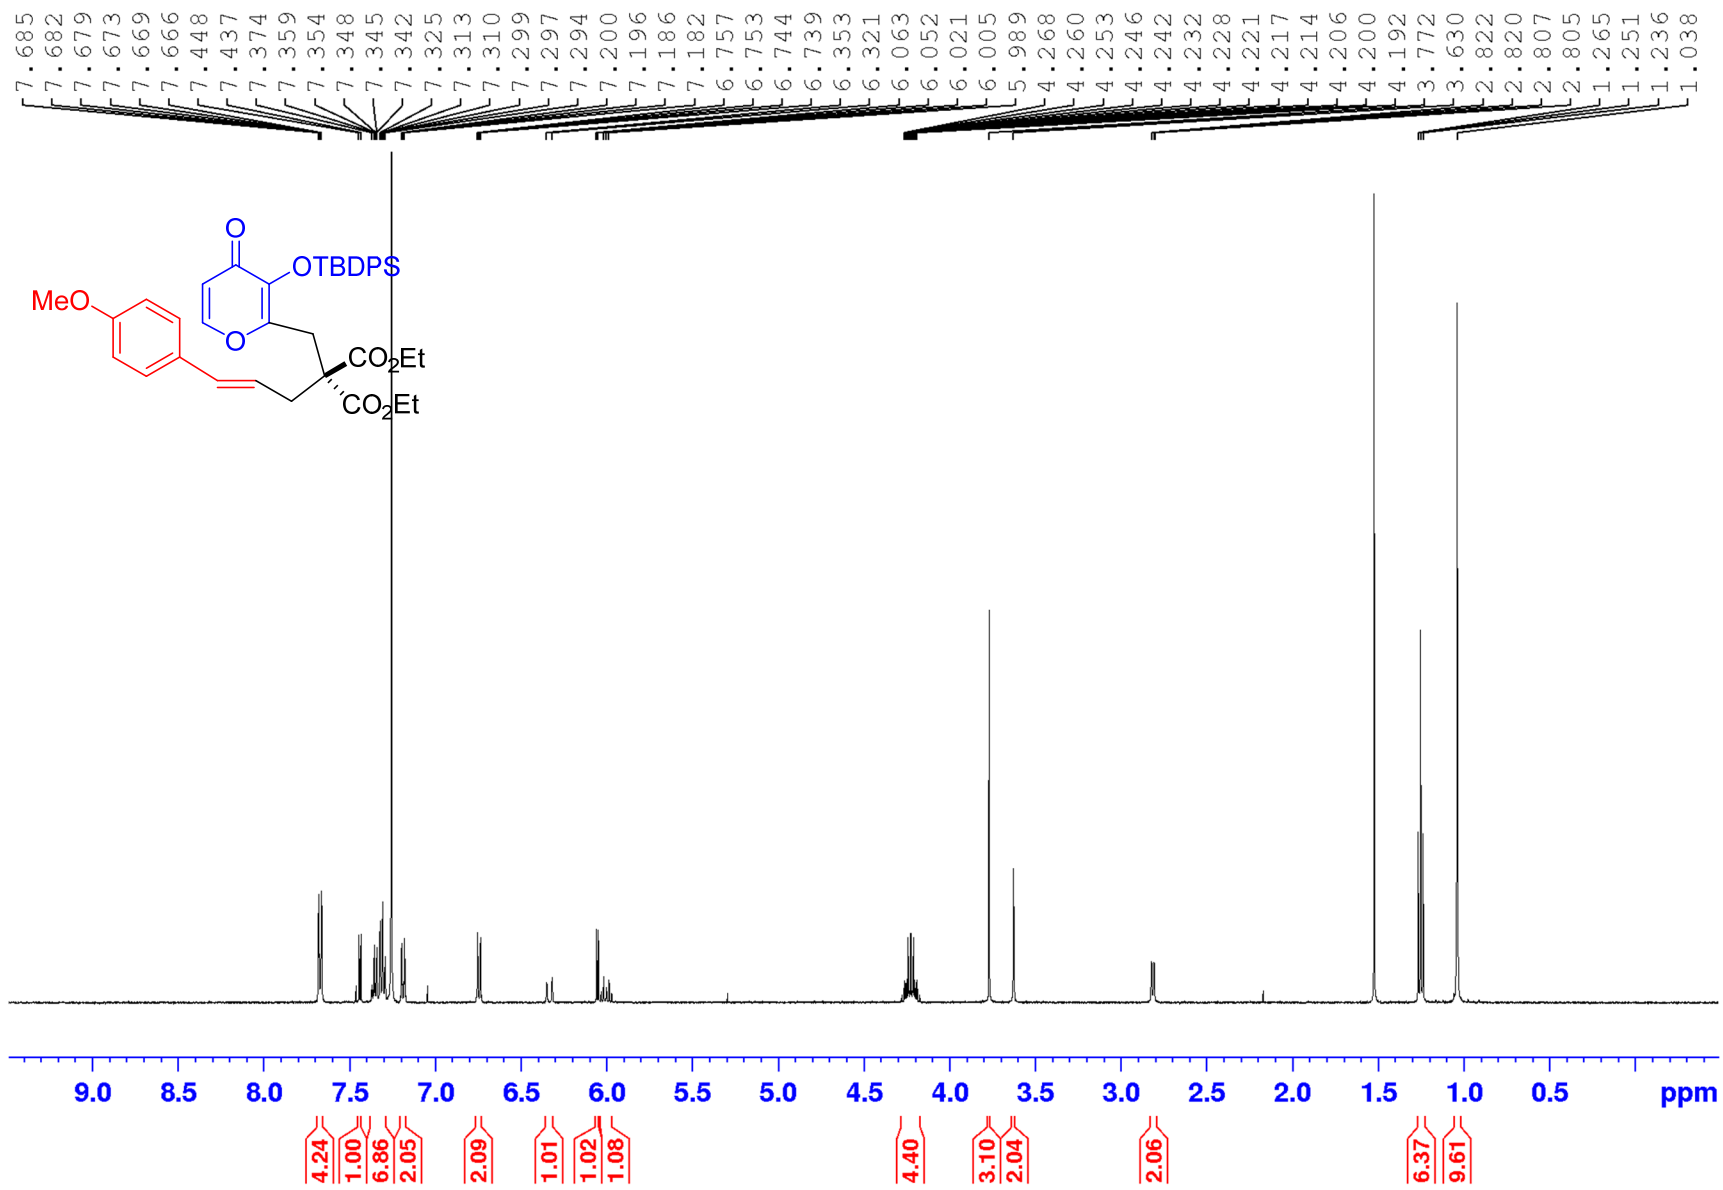

<sup>1</sup>H NMR (500 MHz) of 1s' in CDCl<sub>3</sub>

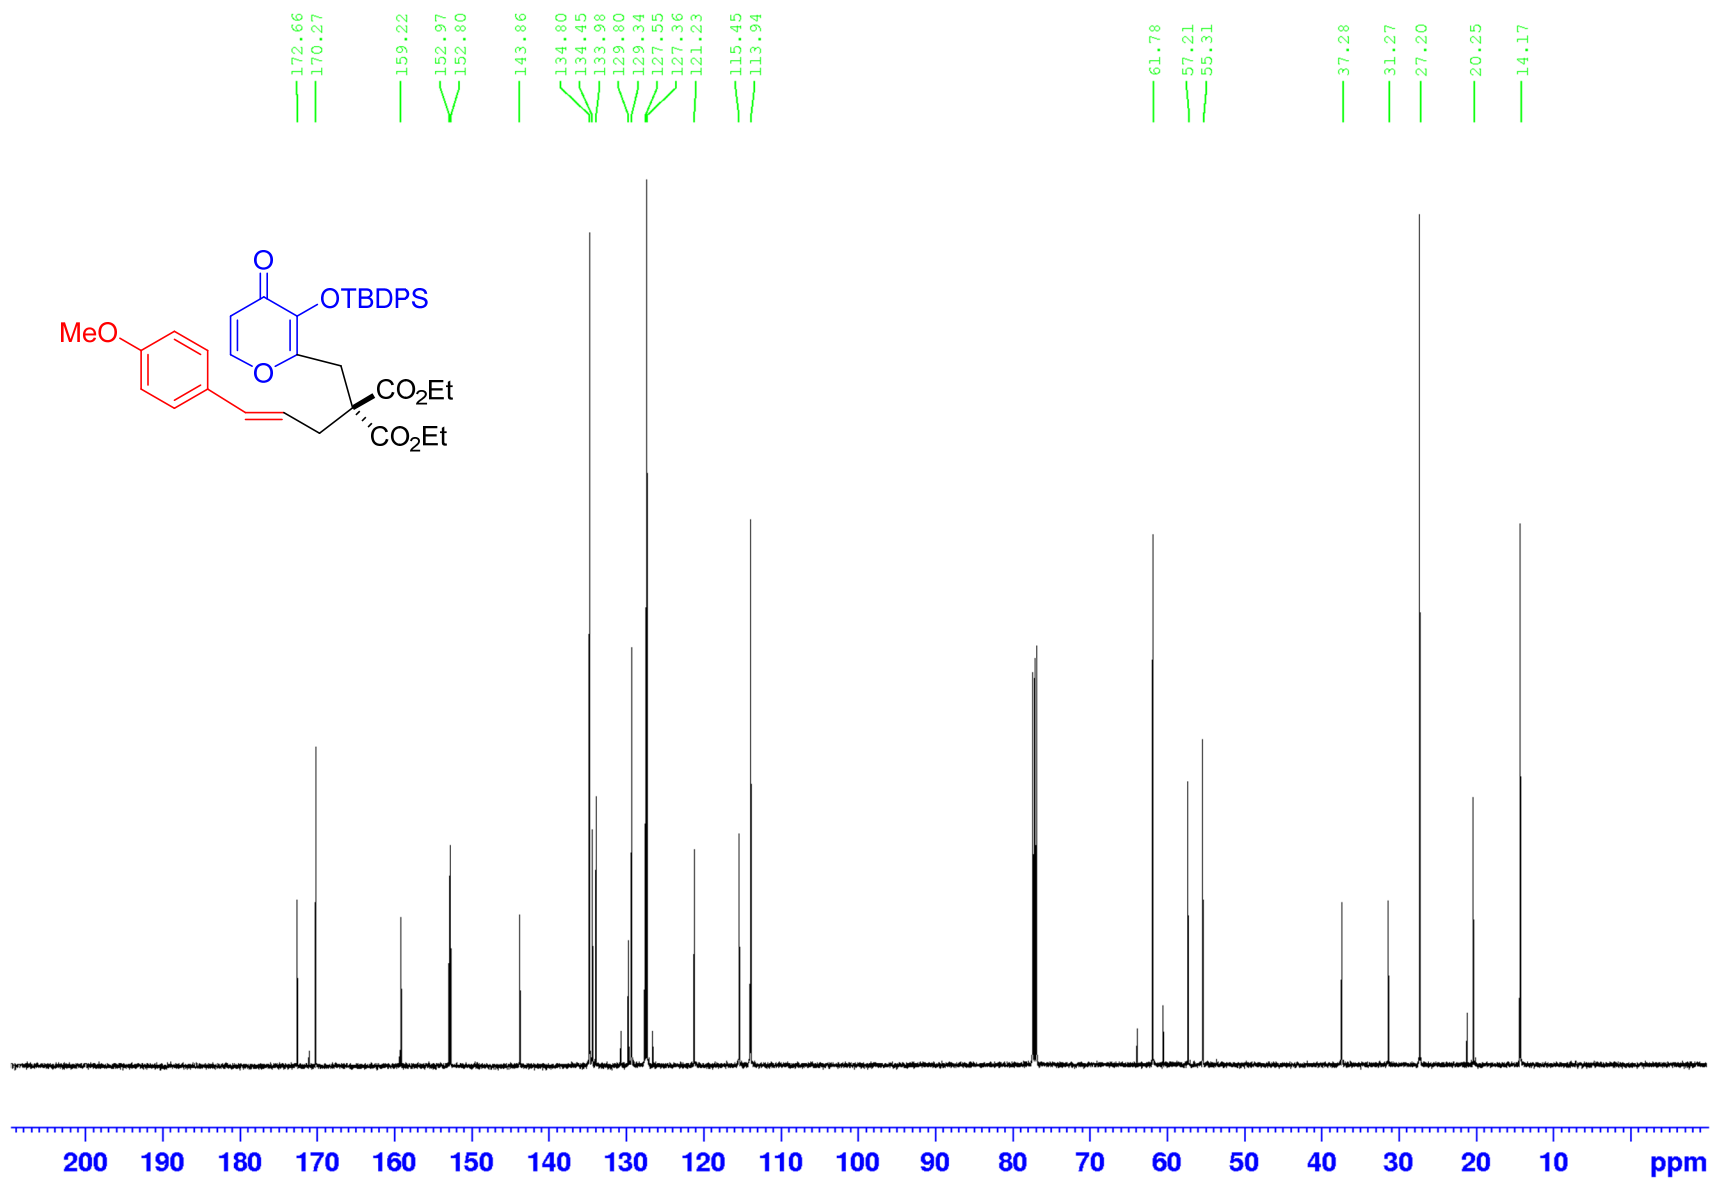

<sup>13</sup>C{<sup>1</sup>H} NMR (125 MHz) of 1s' in CDCl<sub>3</sub>

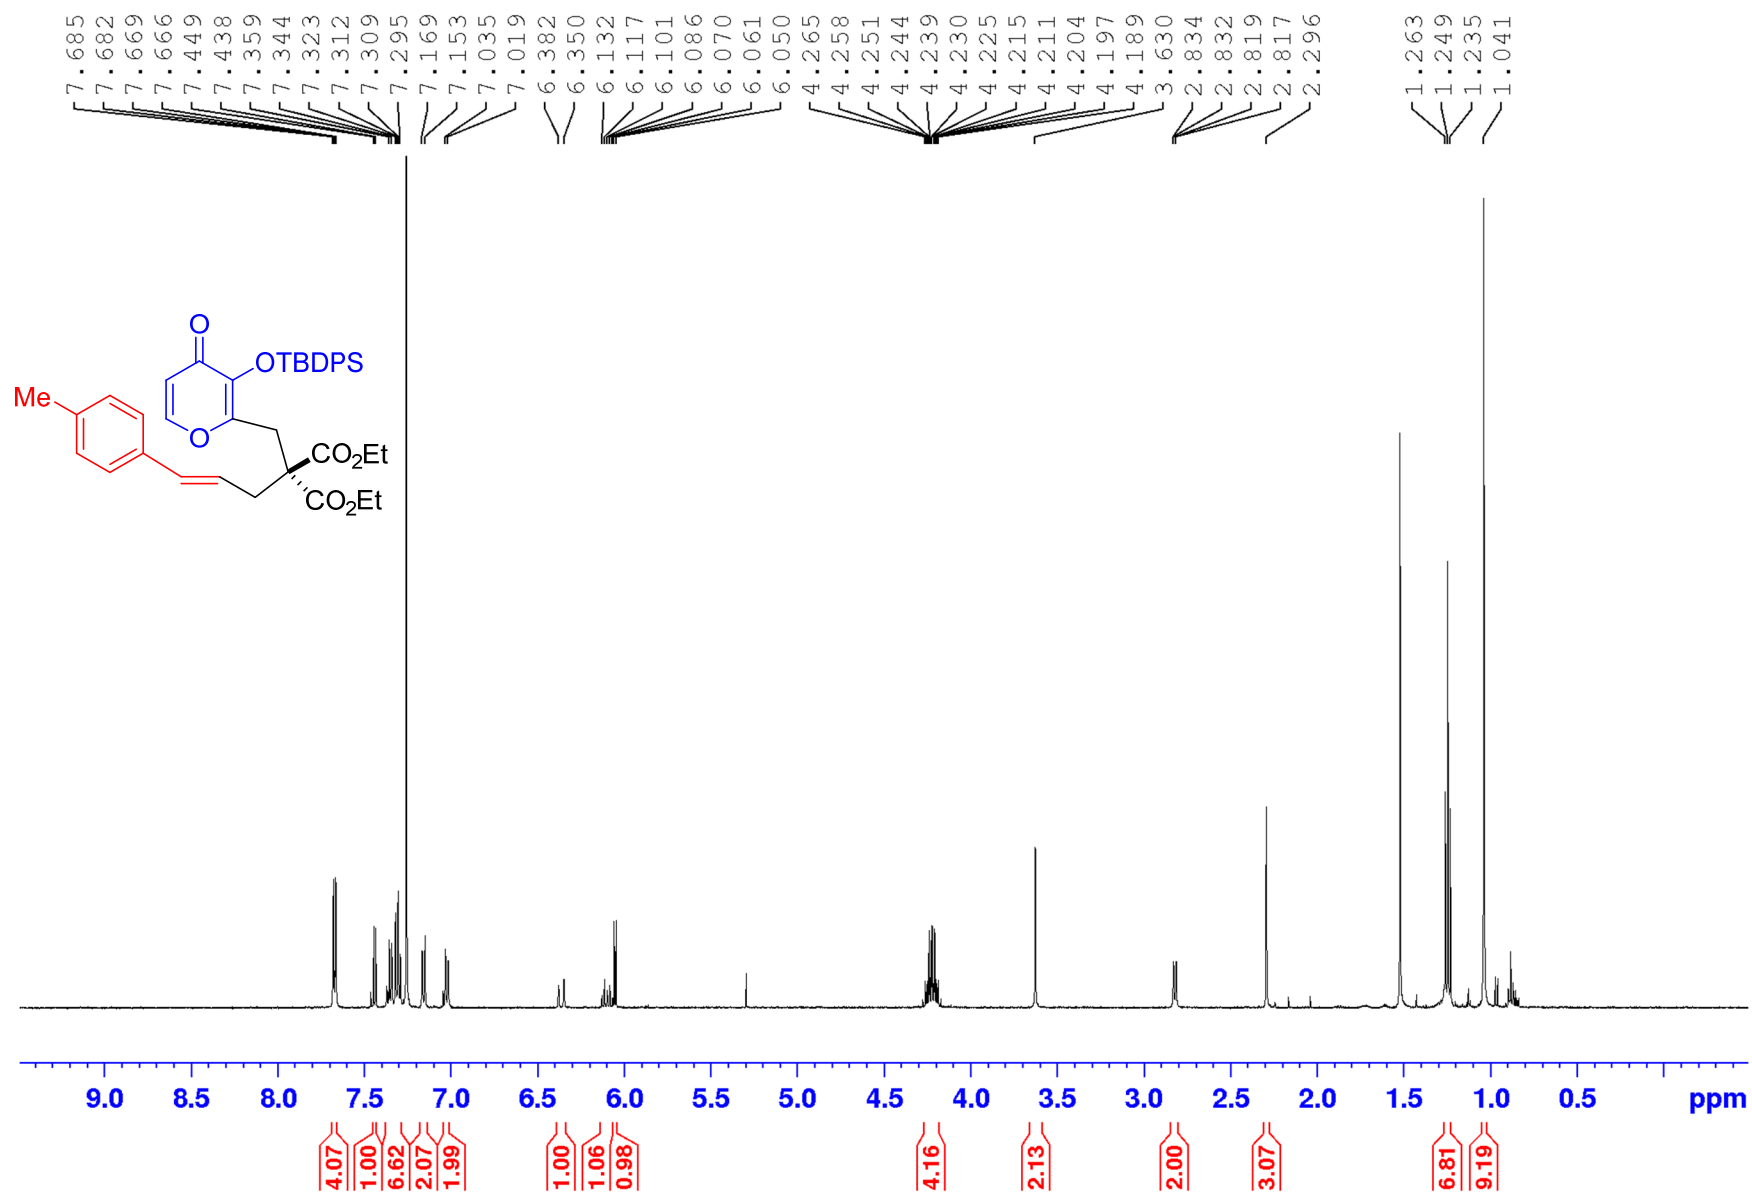

<sup>1</sup>H NMR (500 MHz) of 1t' in CDCl<sub>3</sub>

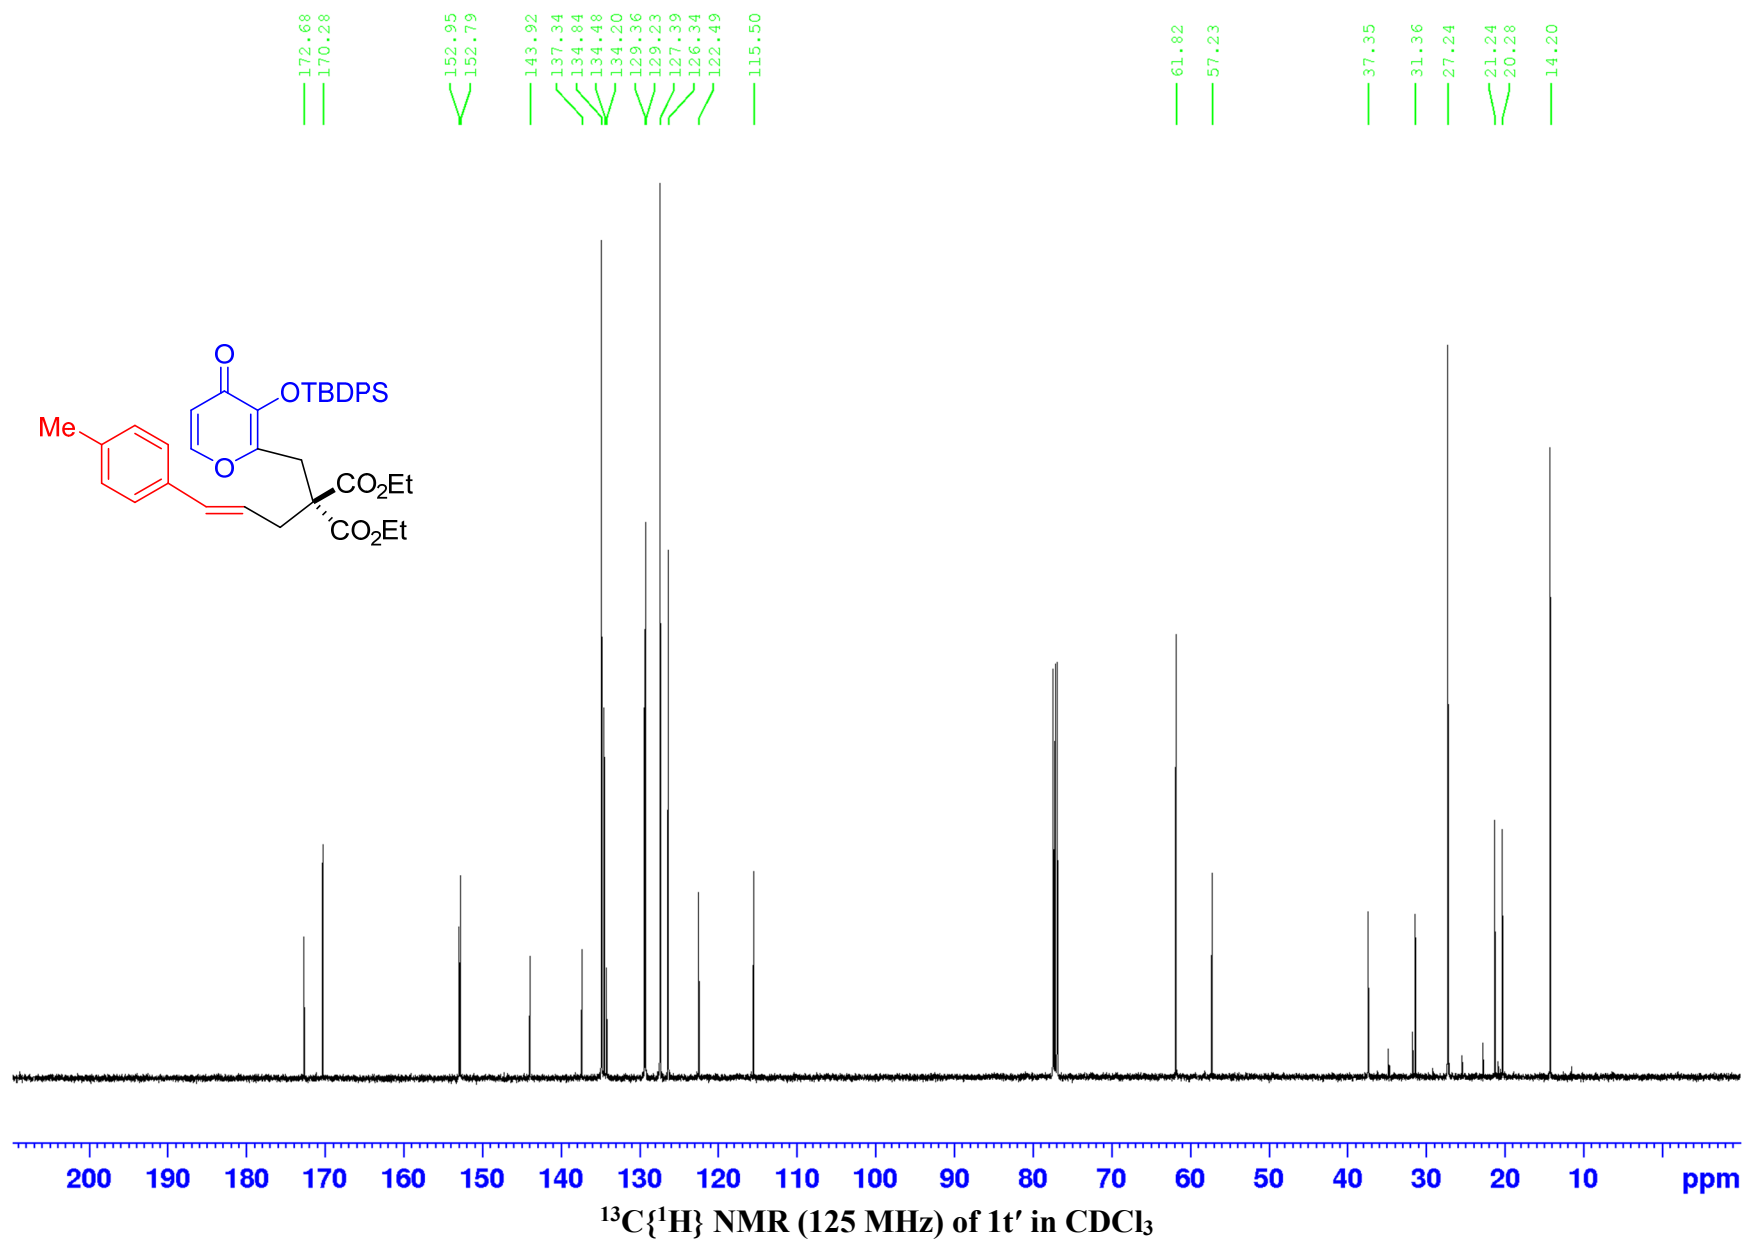

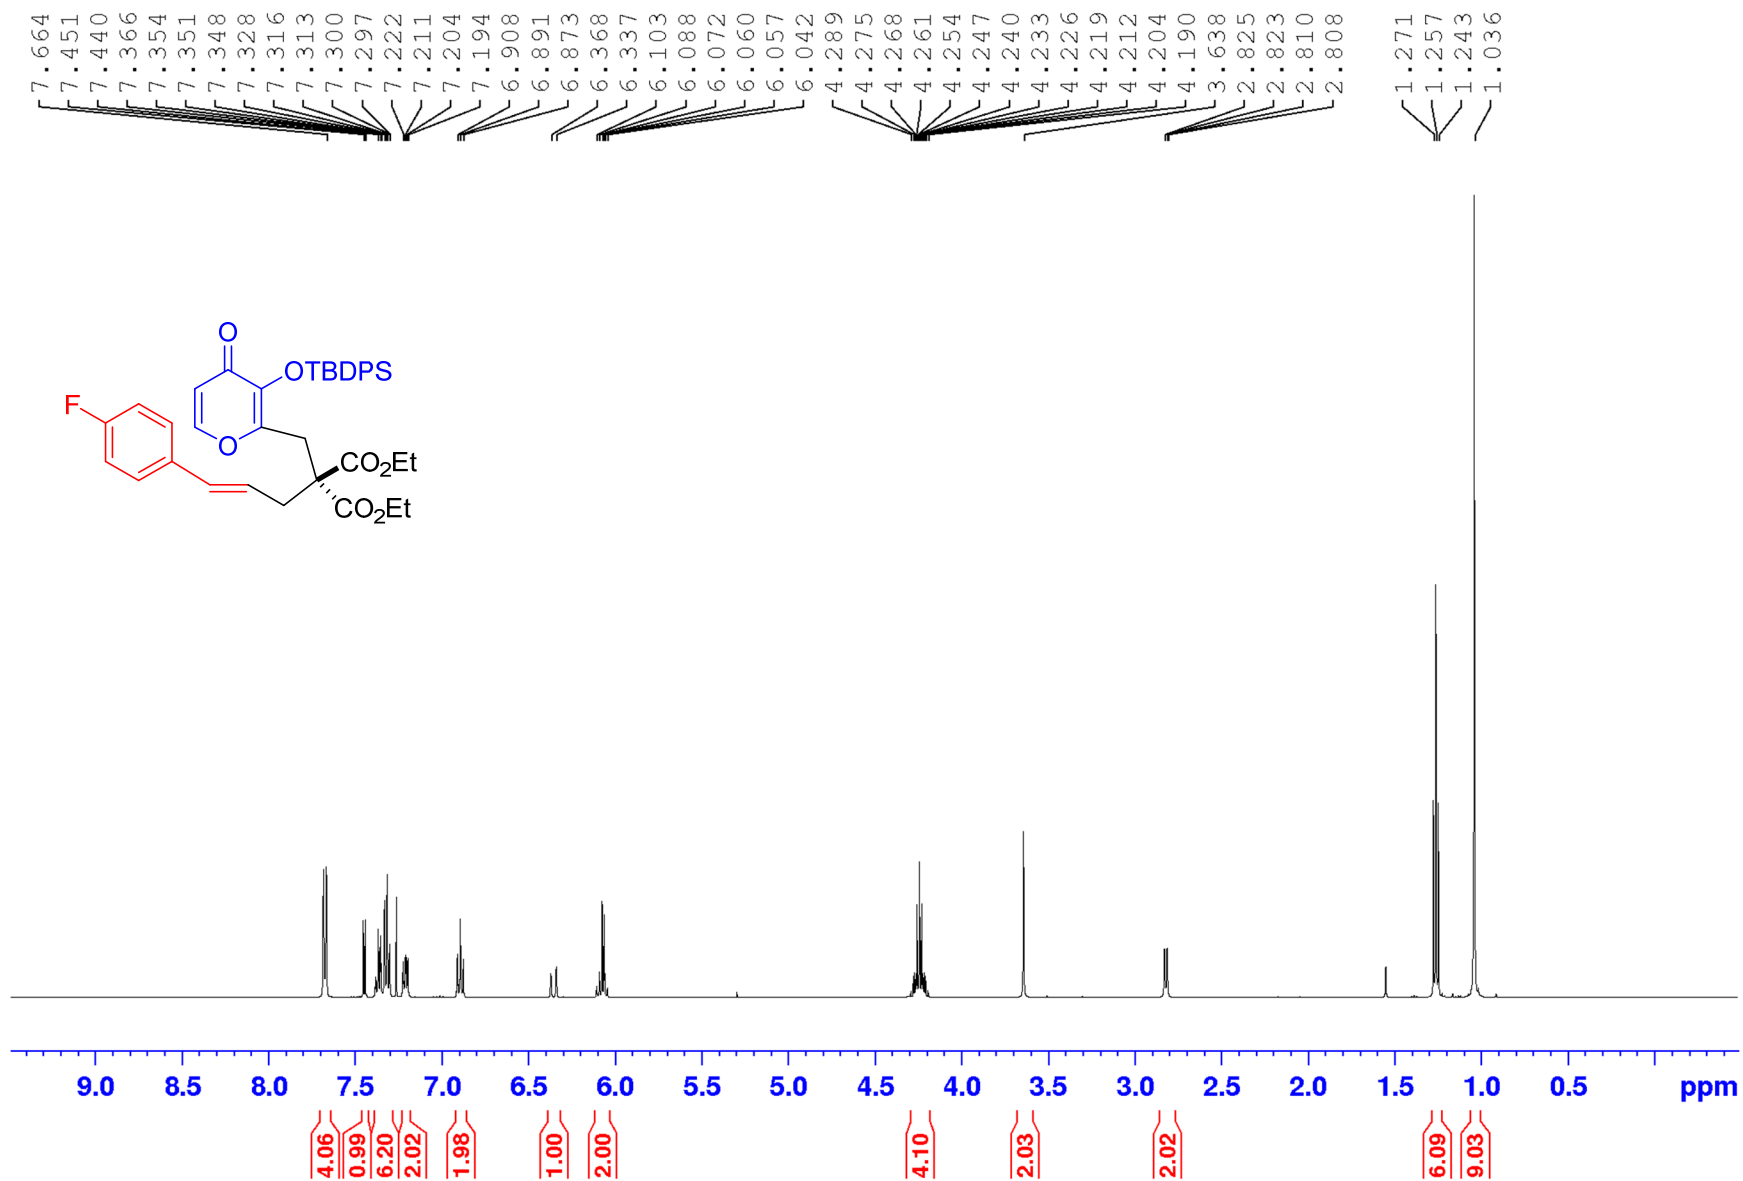

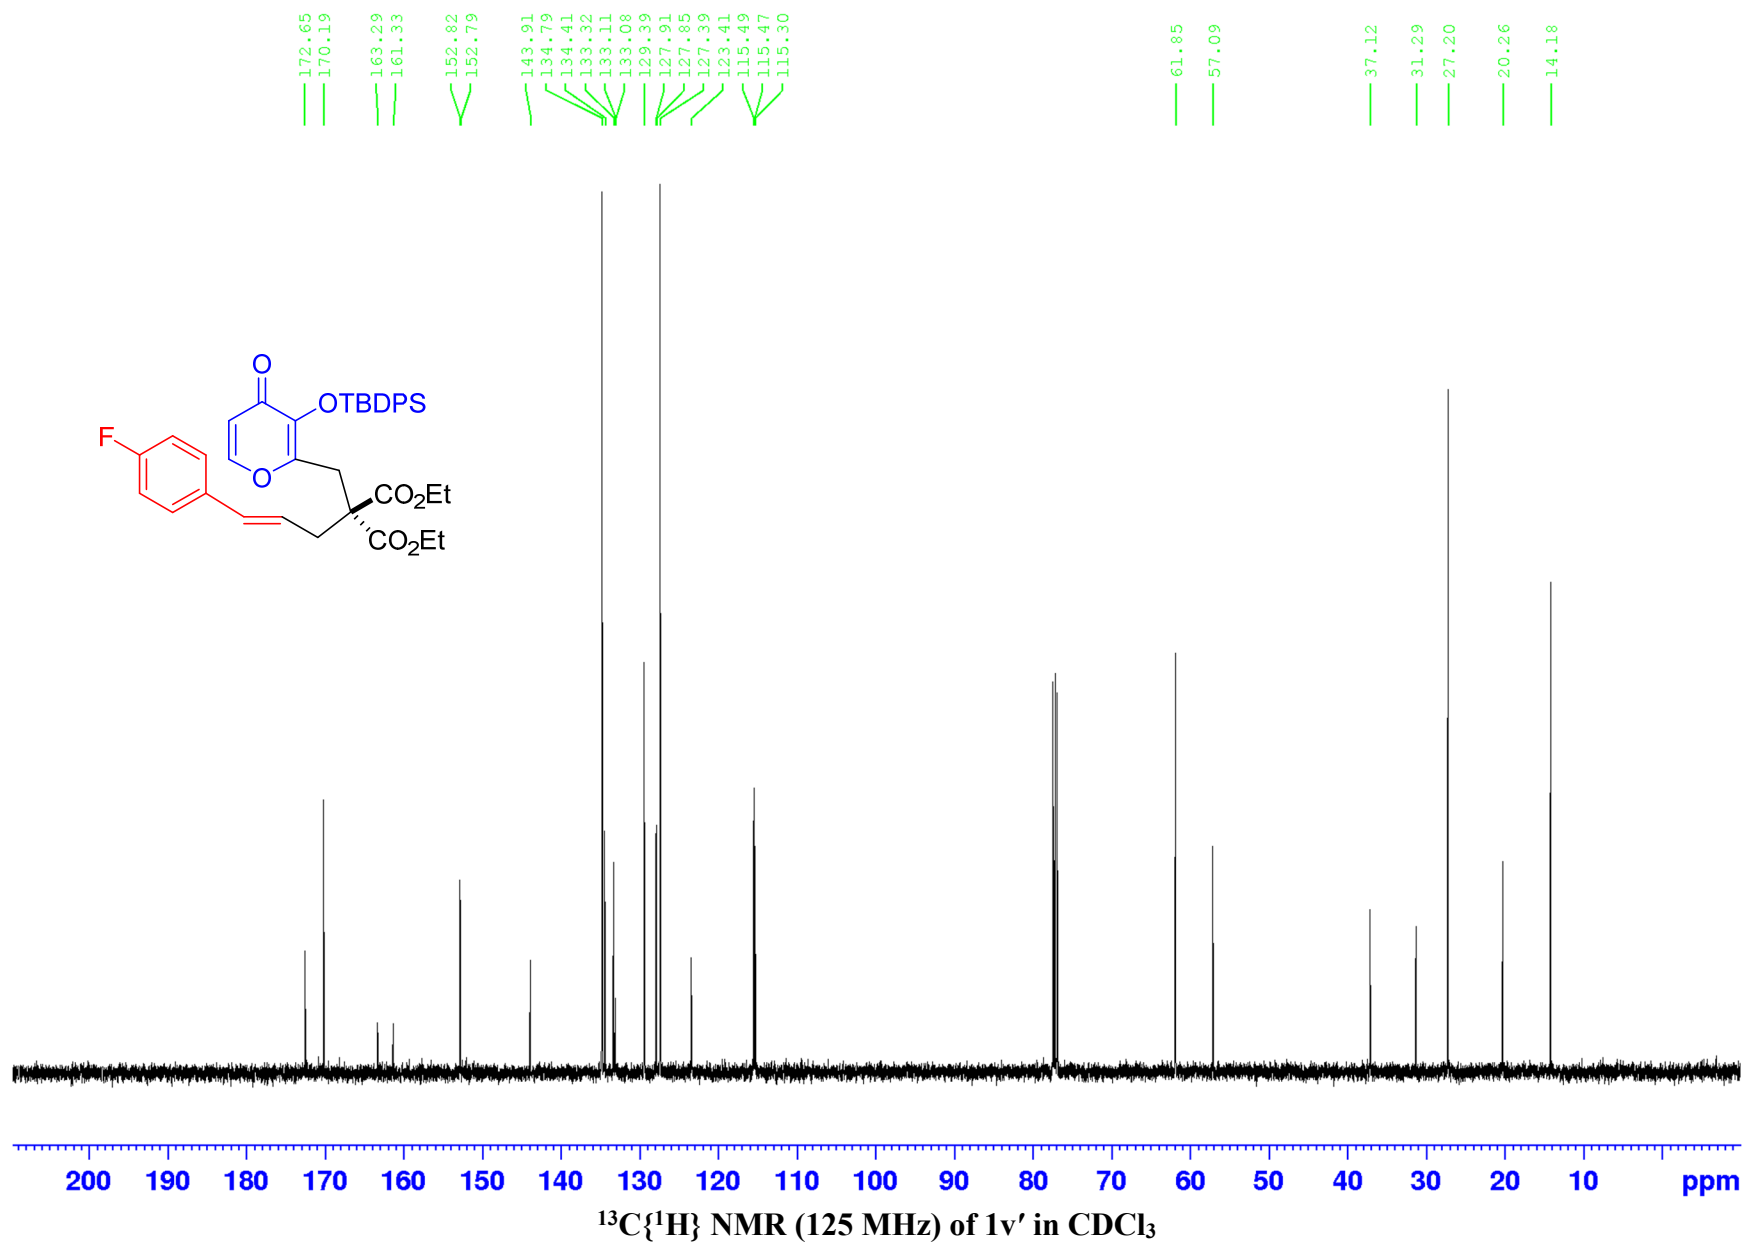

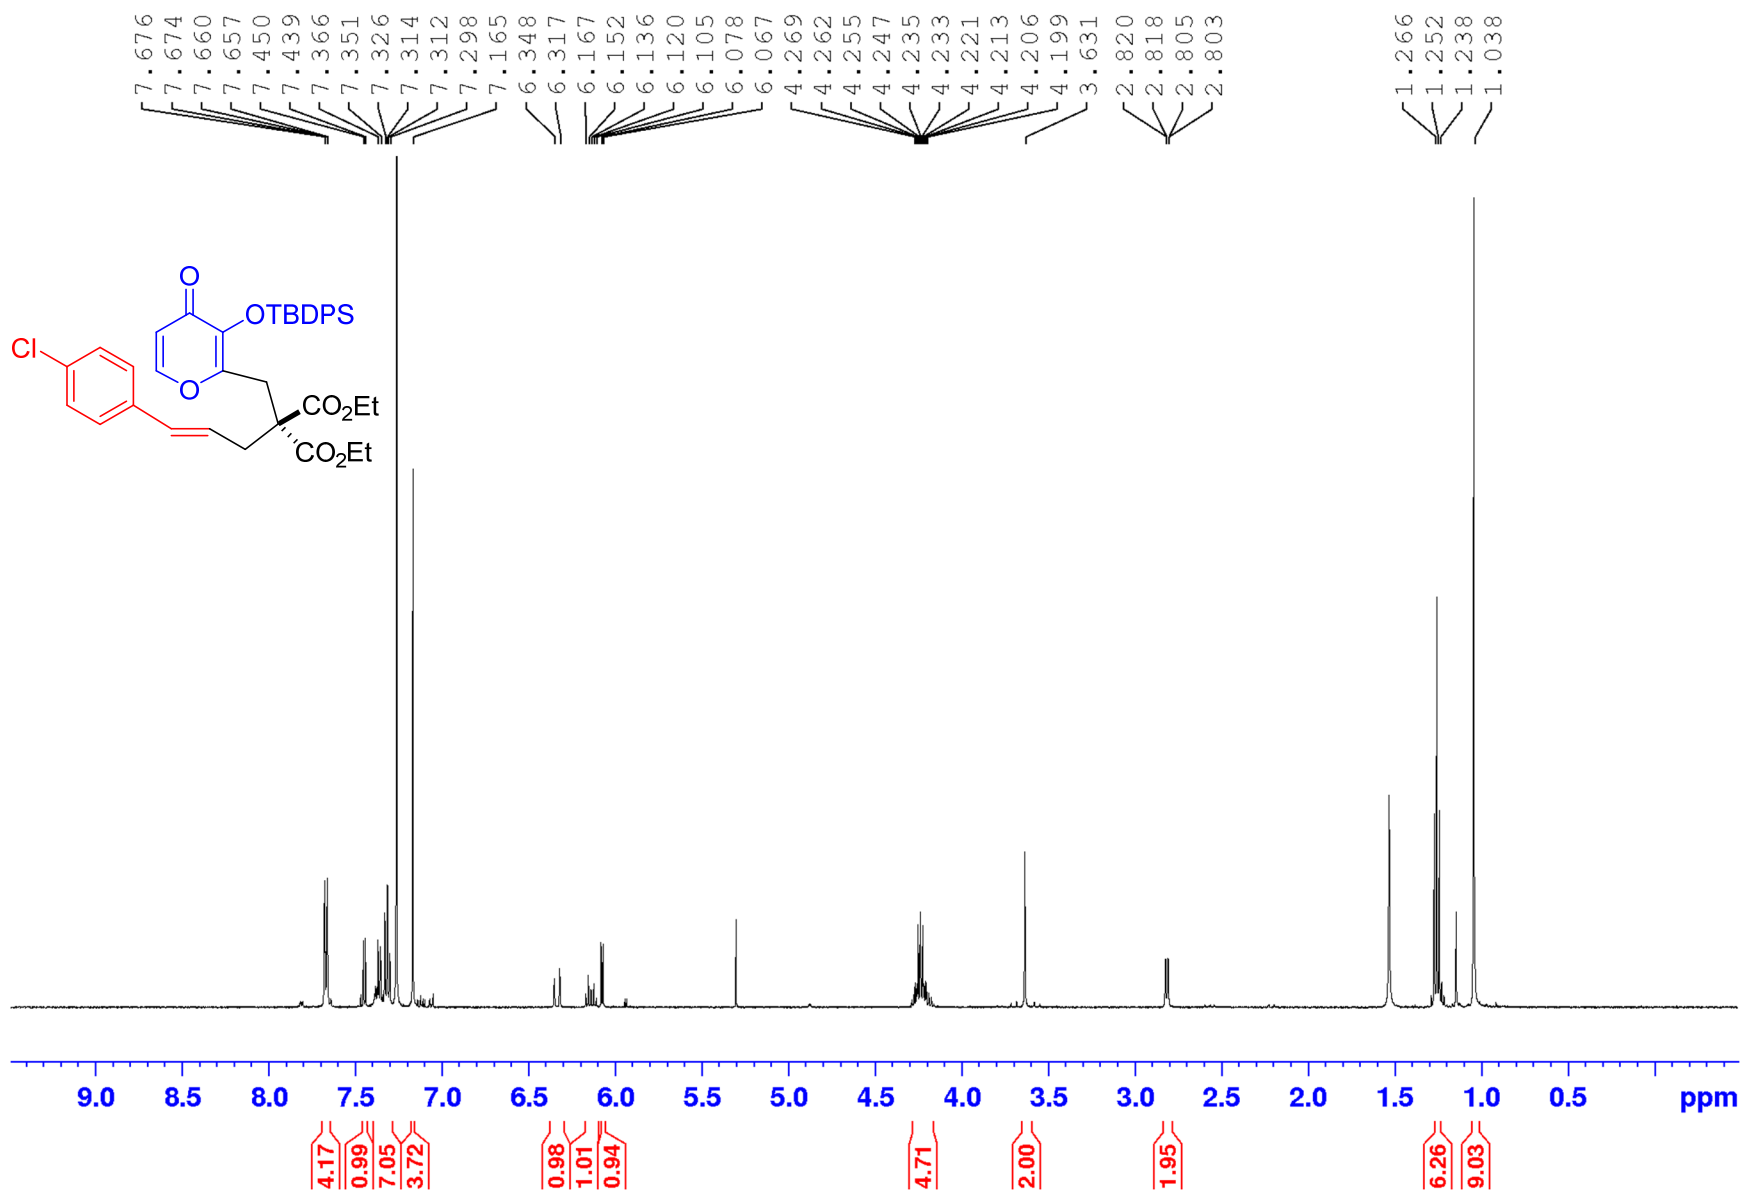

<sup>1</sup>H NMR (500 MHz) of 1w' in CDCl<sub>3</sub>

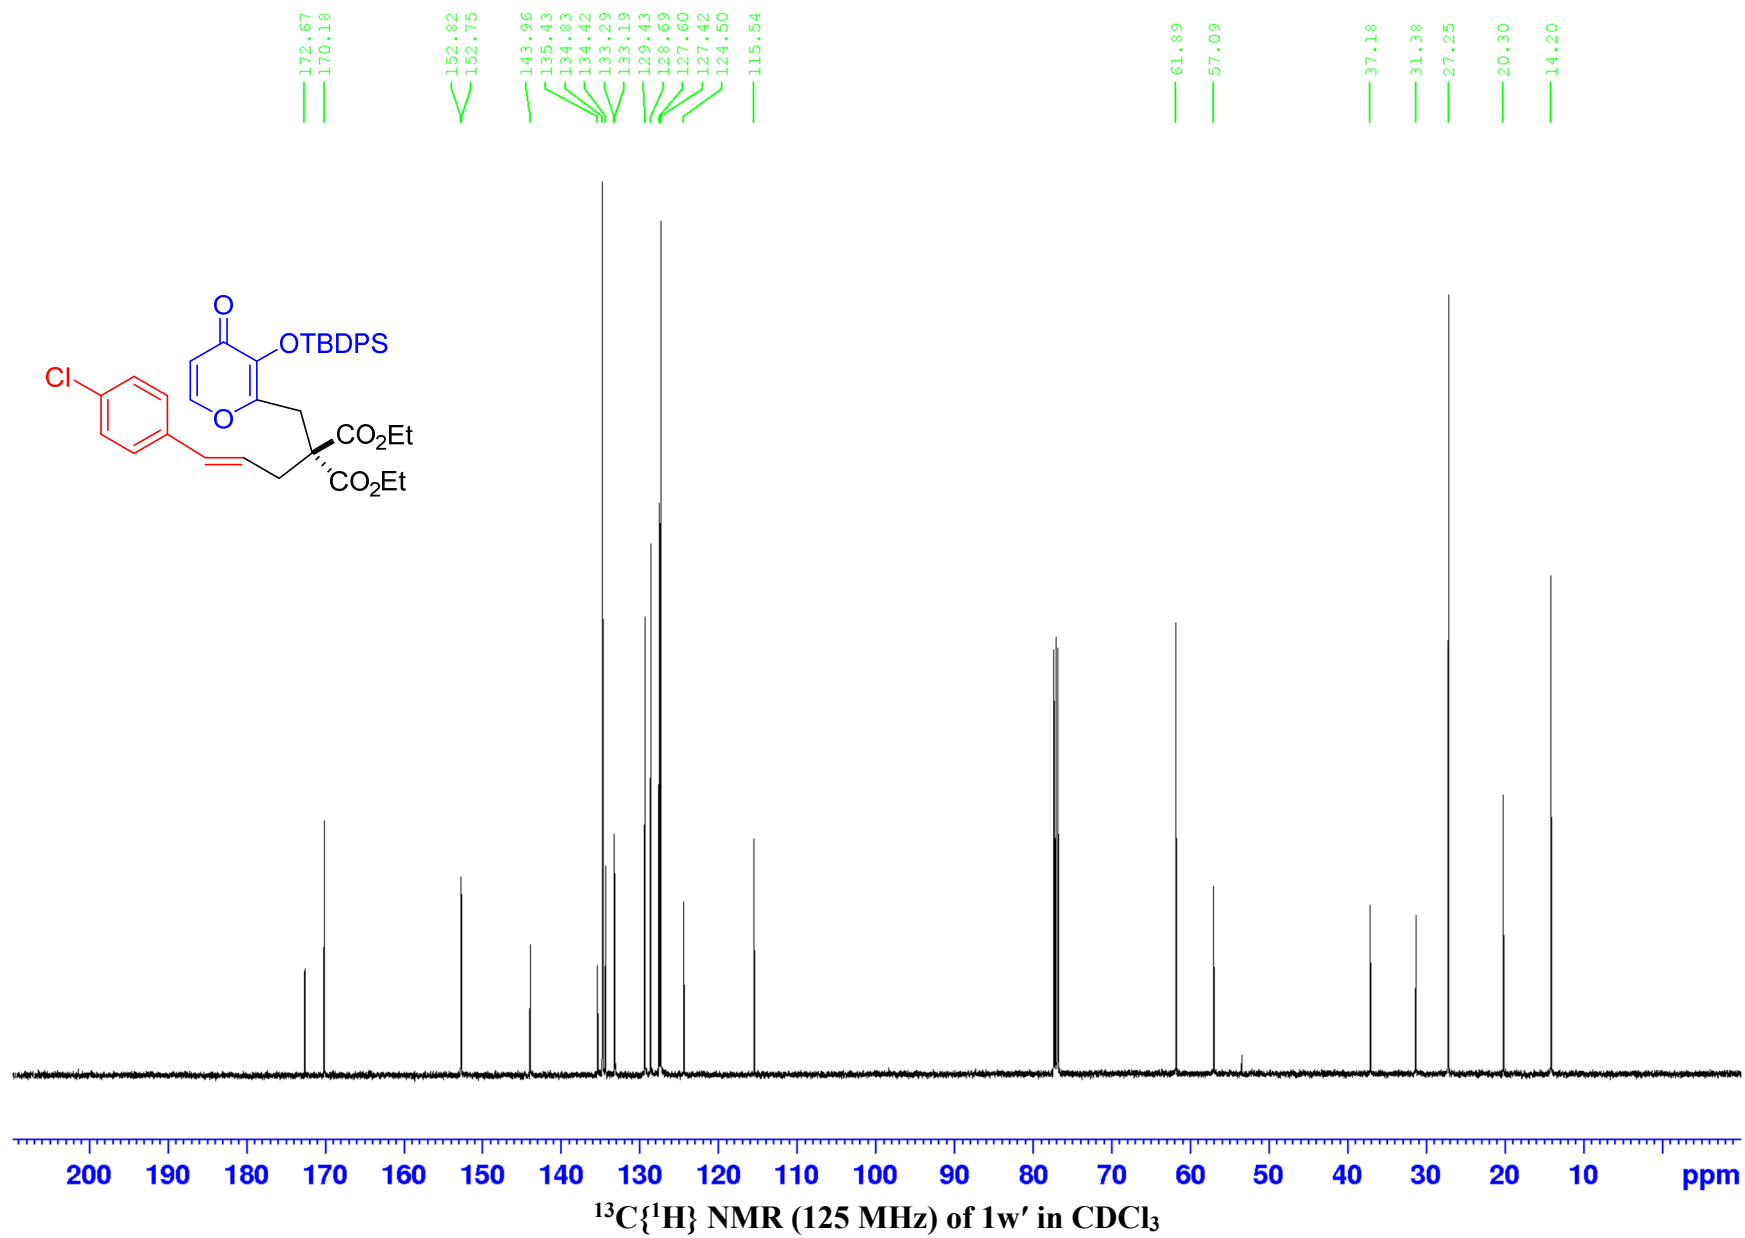

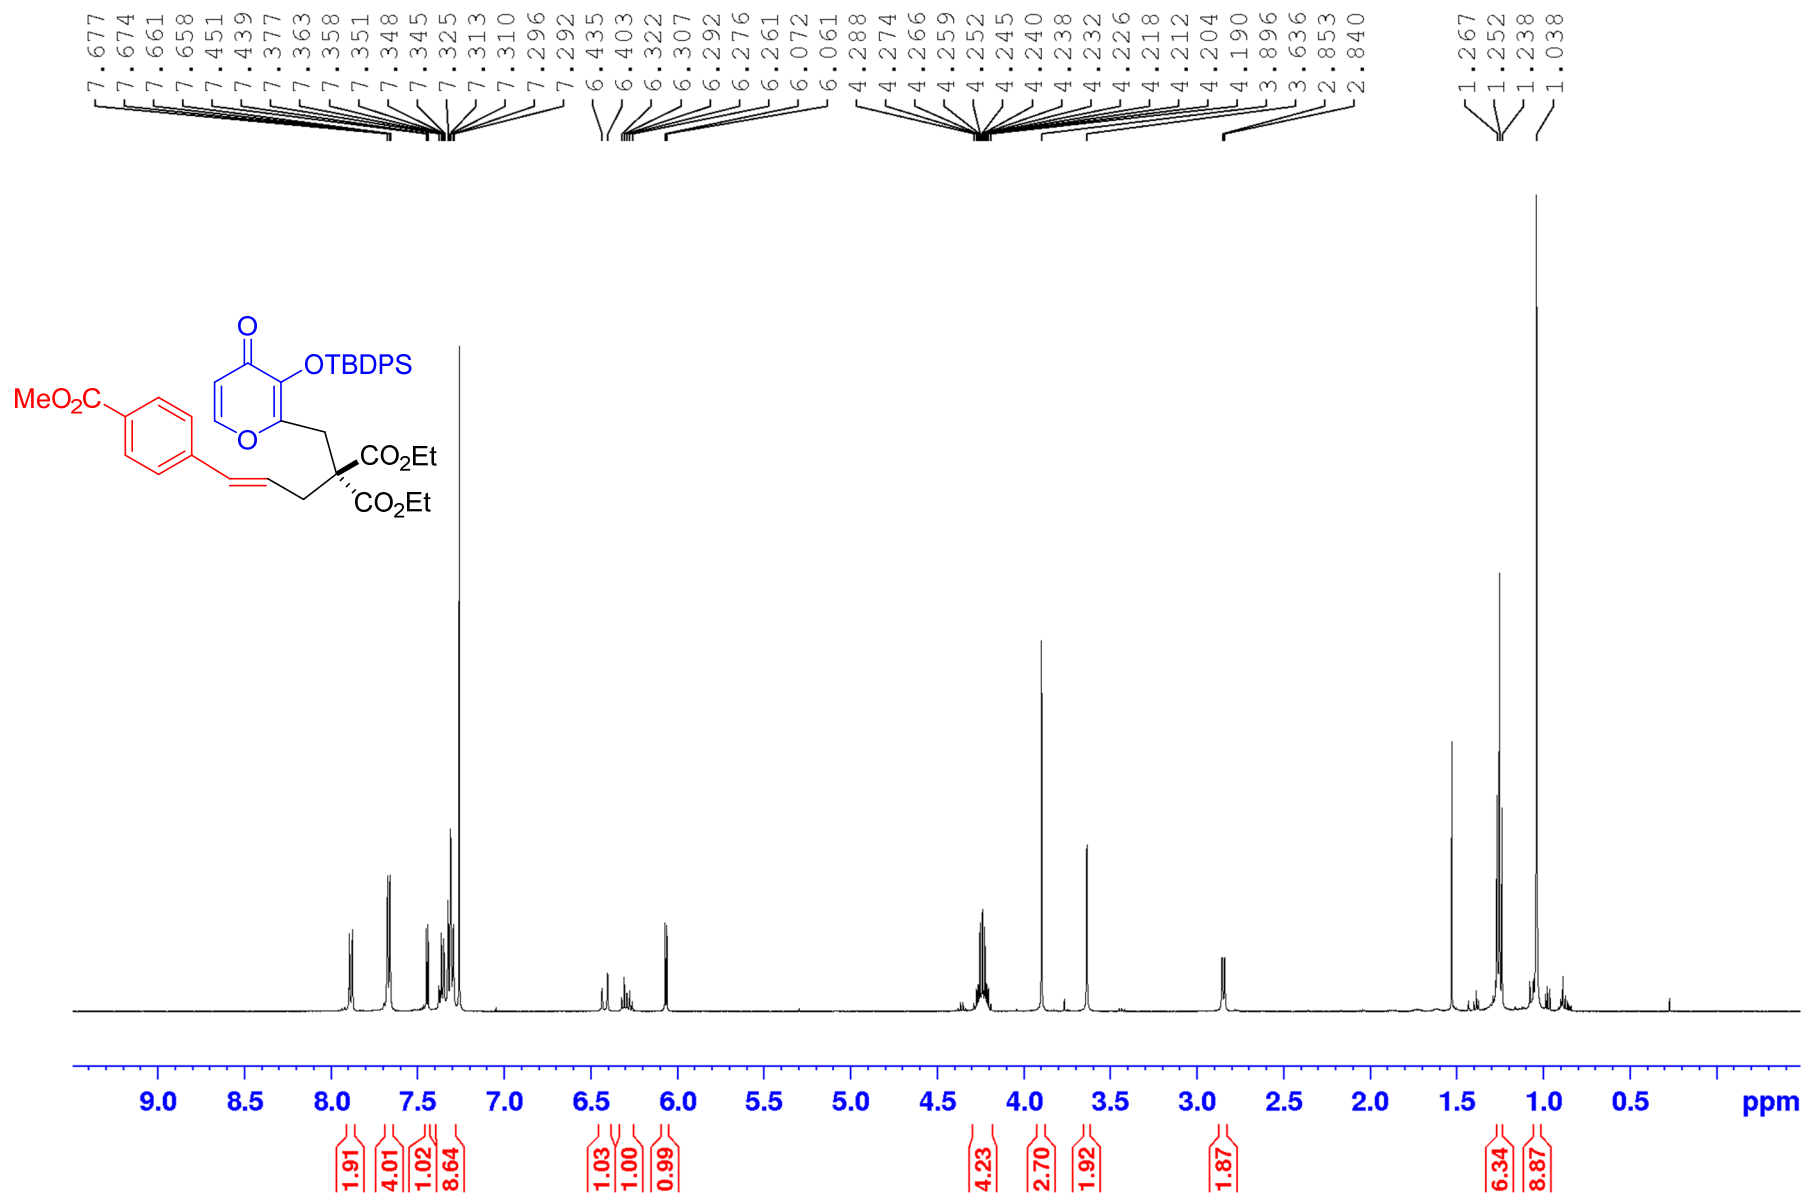

<sup>1</sup>H NMR (500 MHz) of **1x'** in CDCl<sub>3</sub>

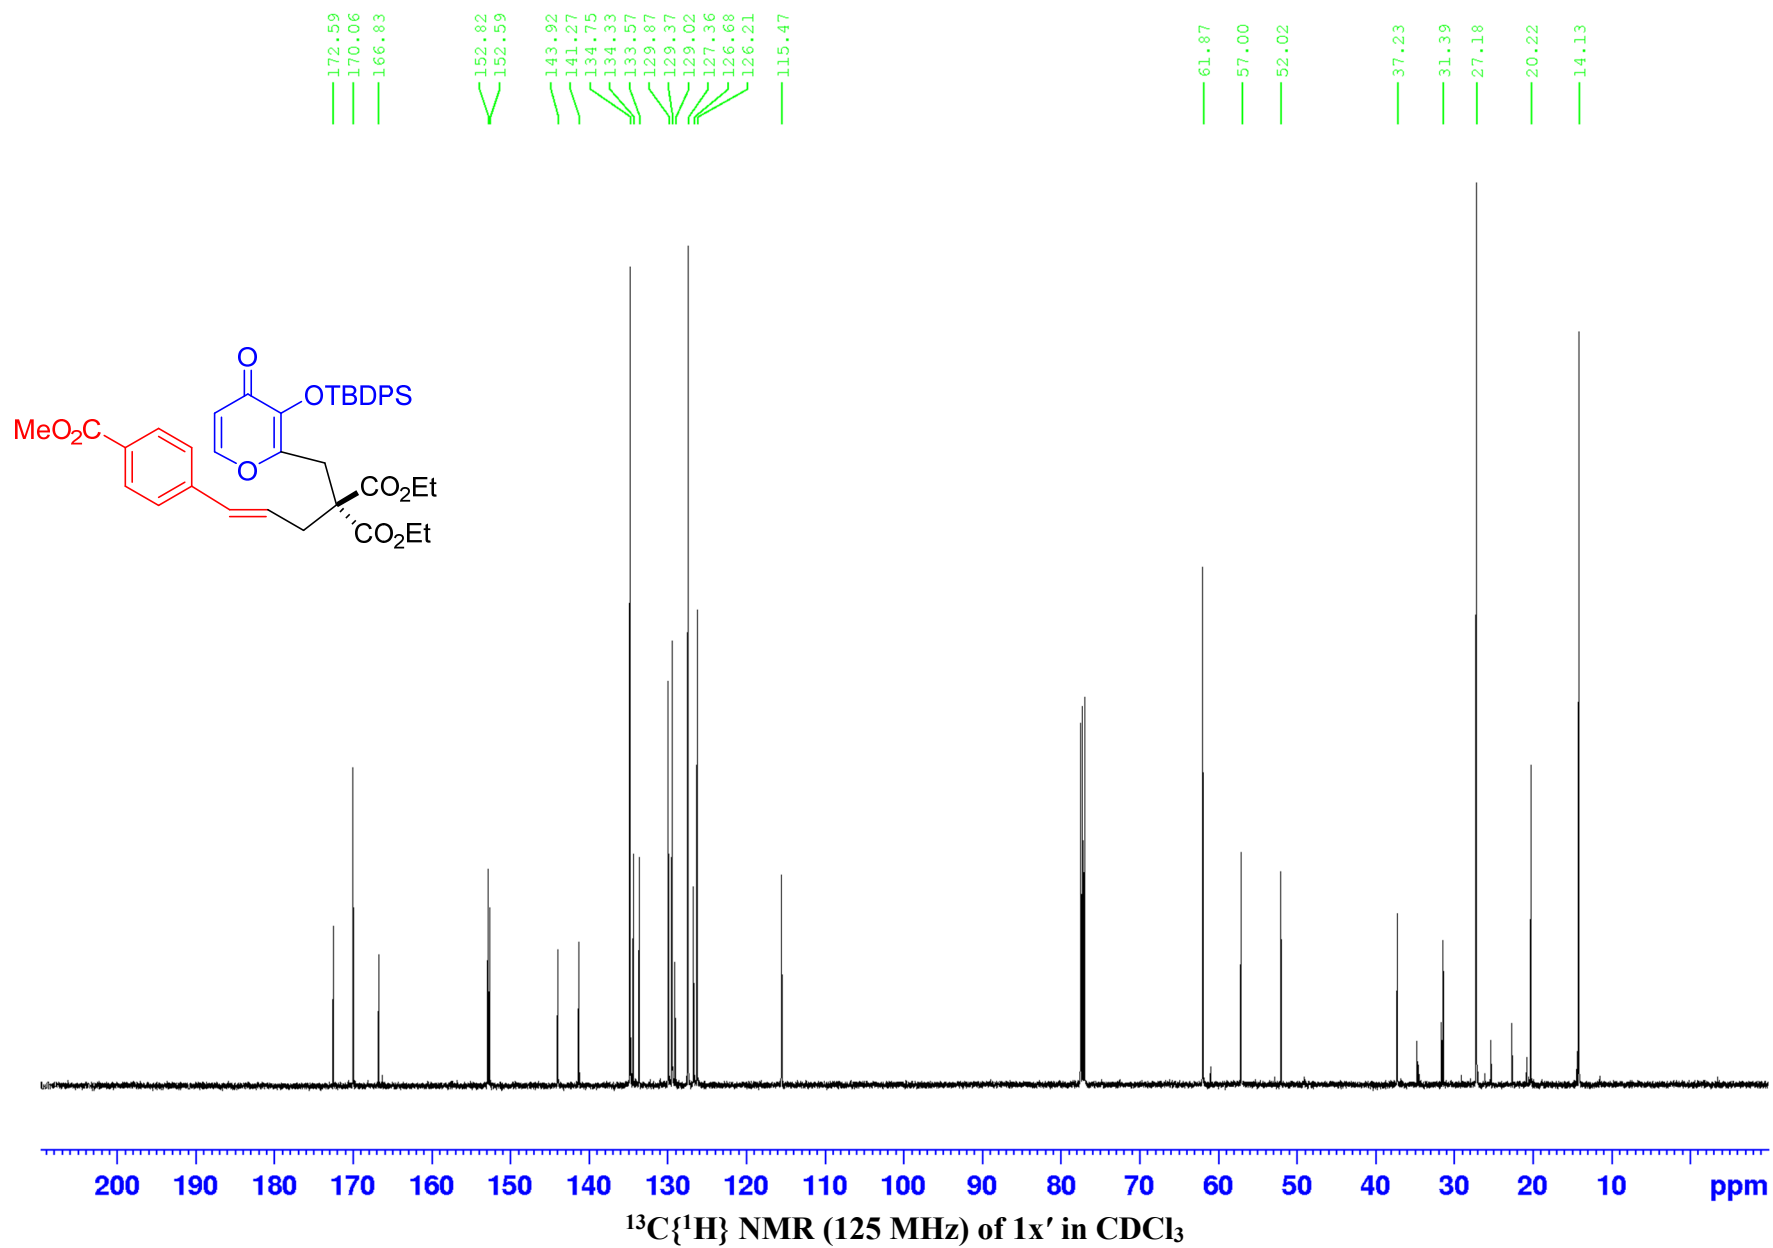

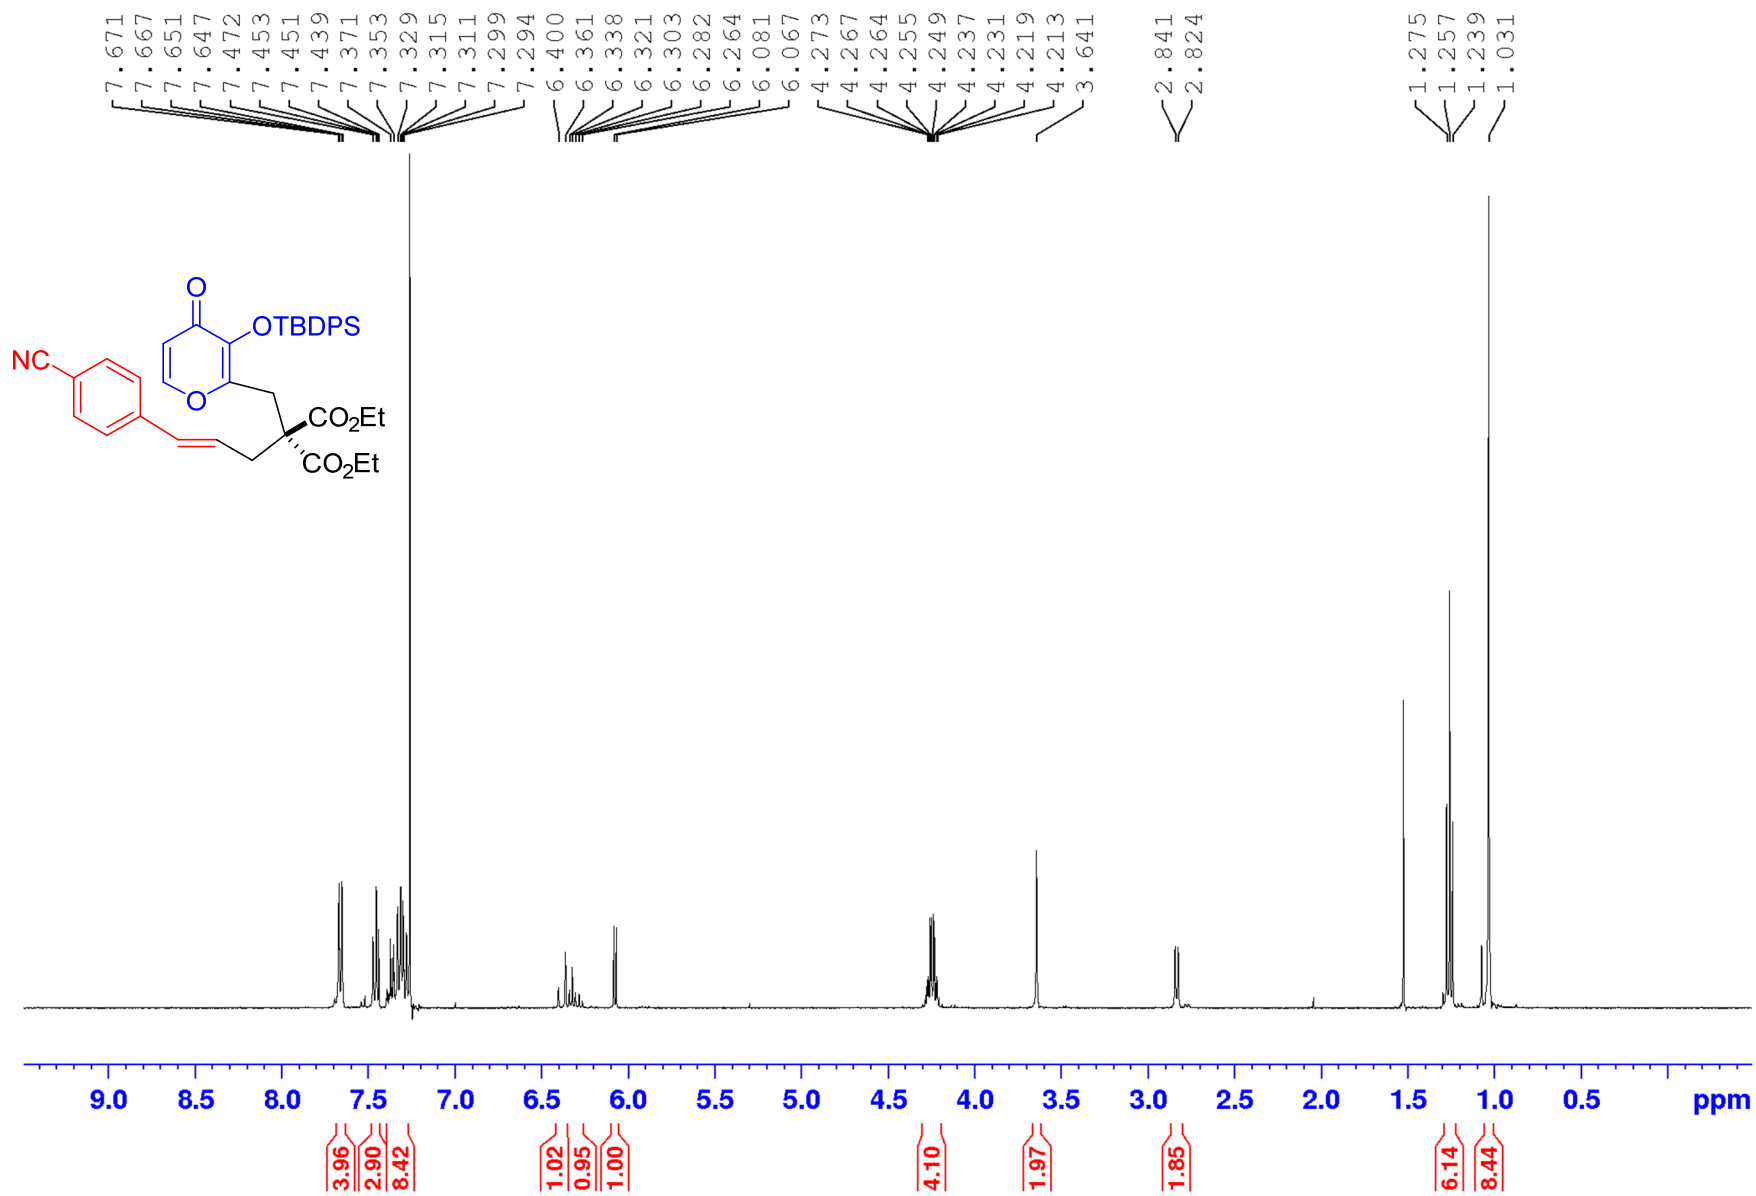

<sup>1</sup>H NMR (500 MHz) of **1y'** in CDCl<sub>3</sub>

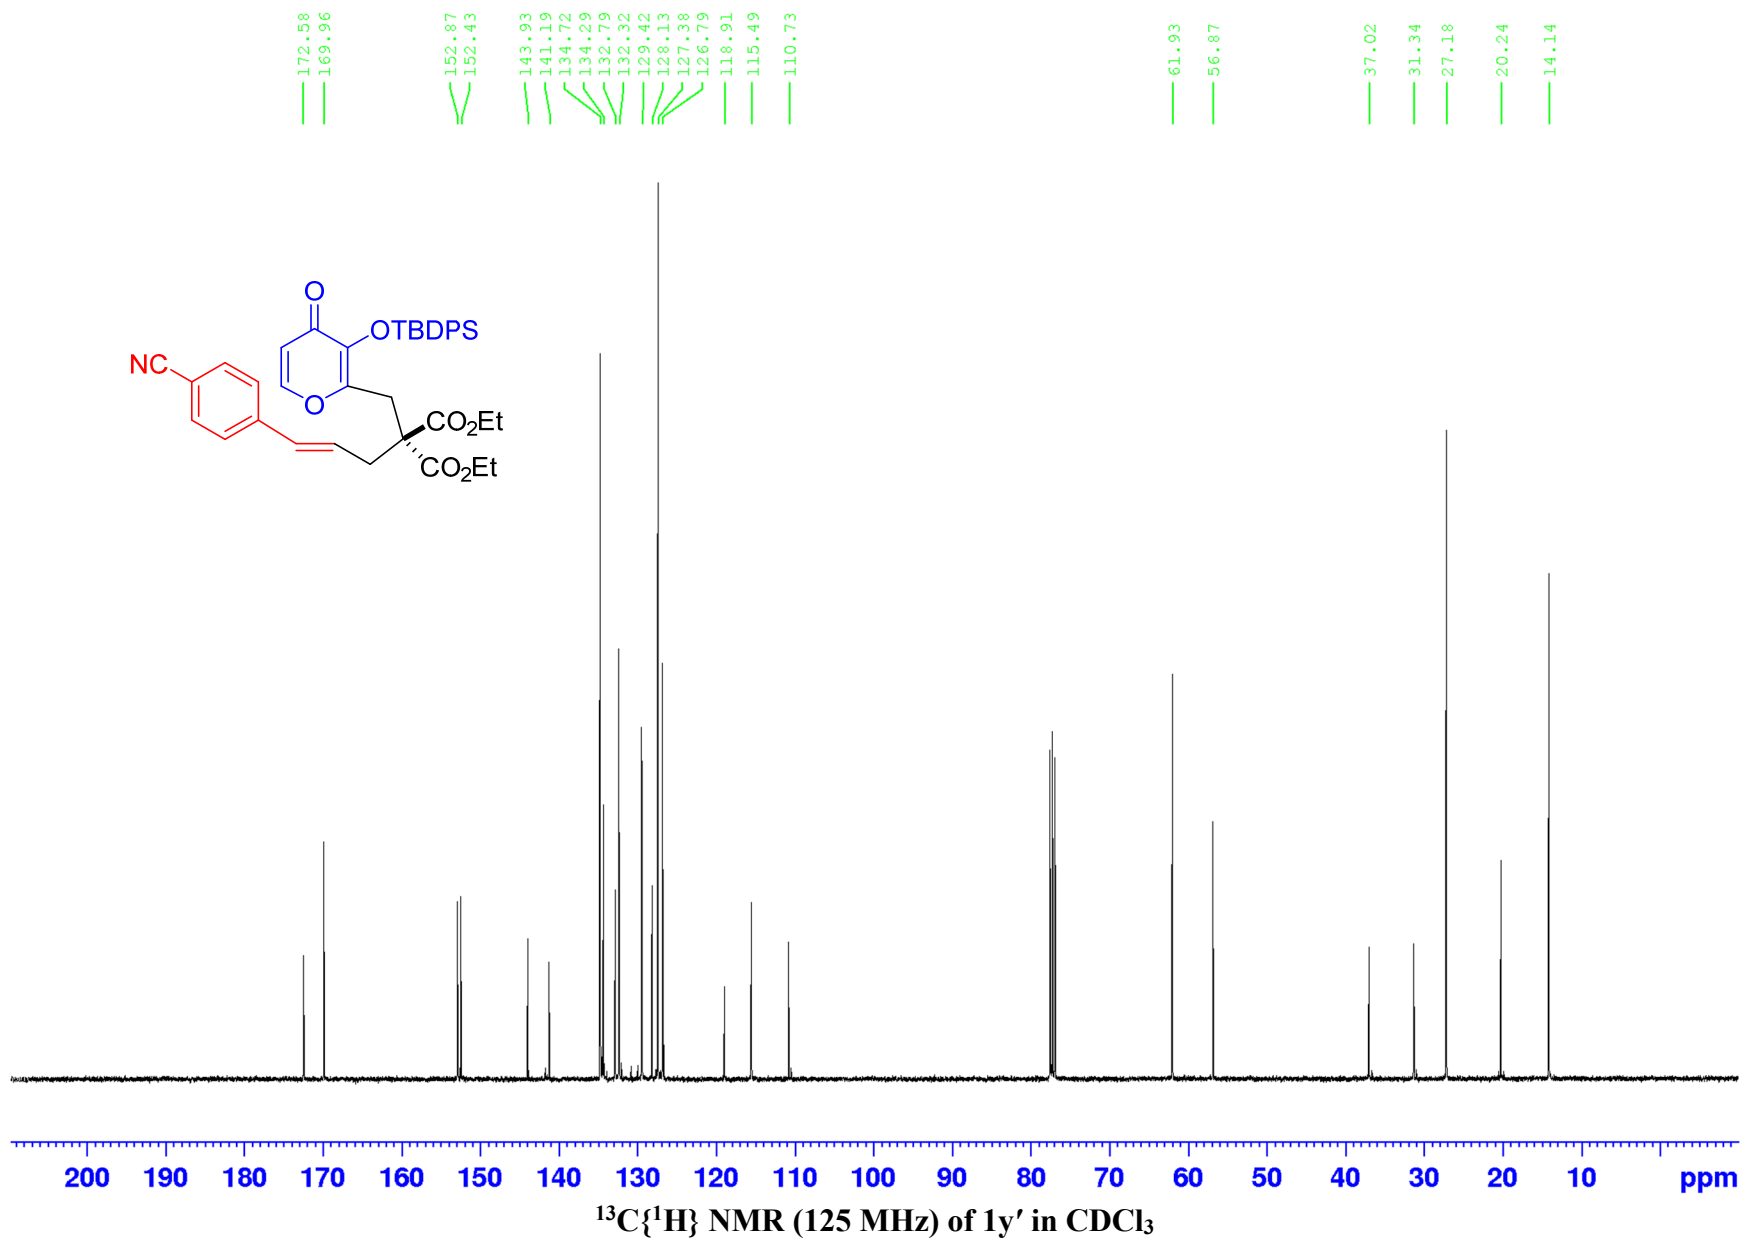

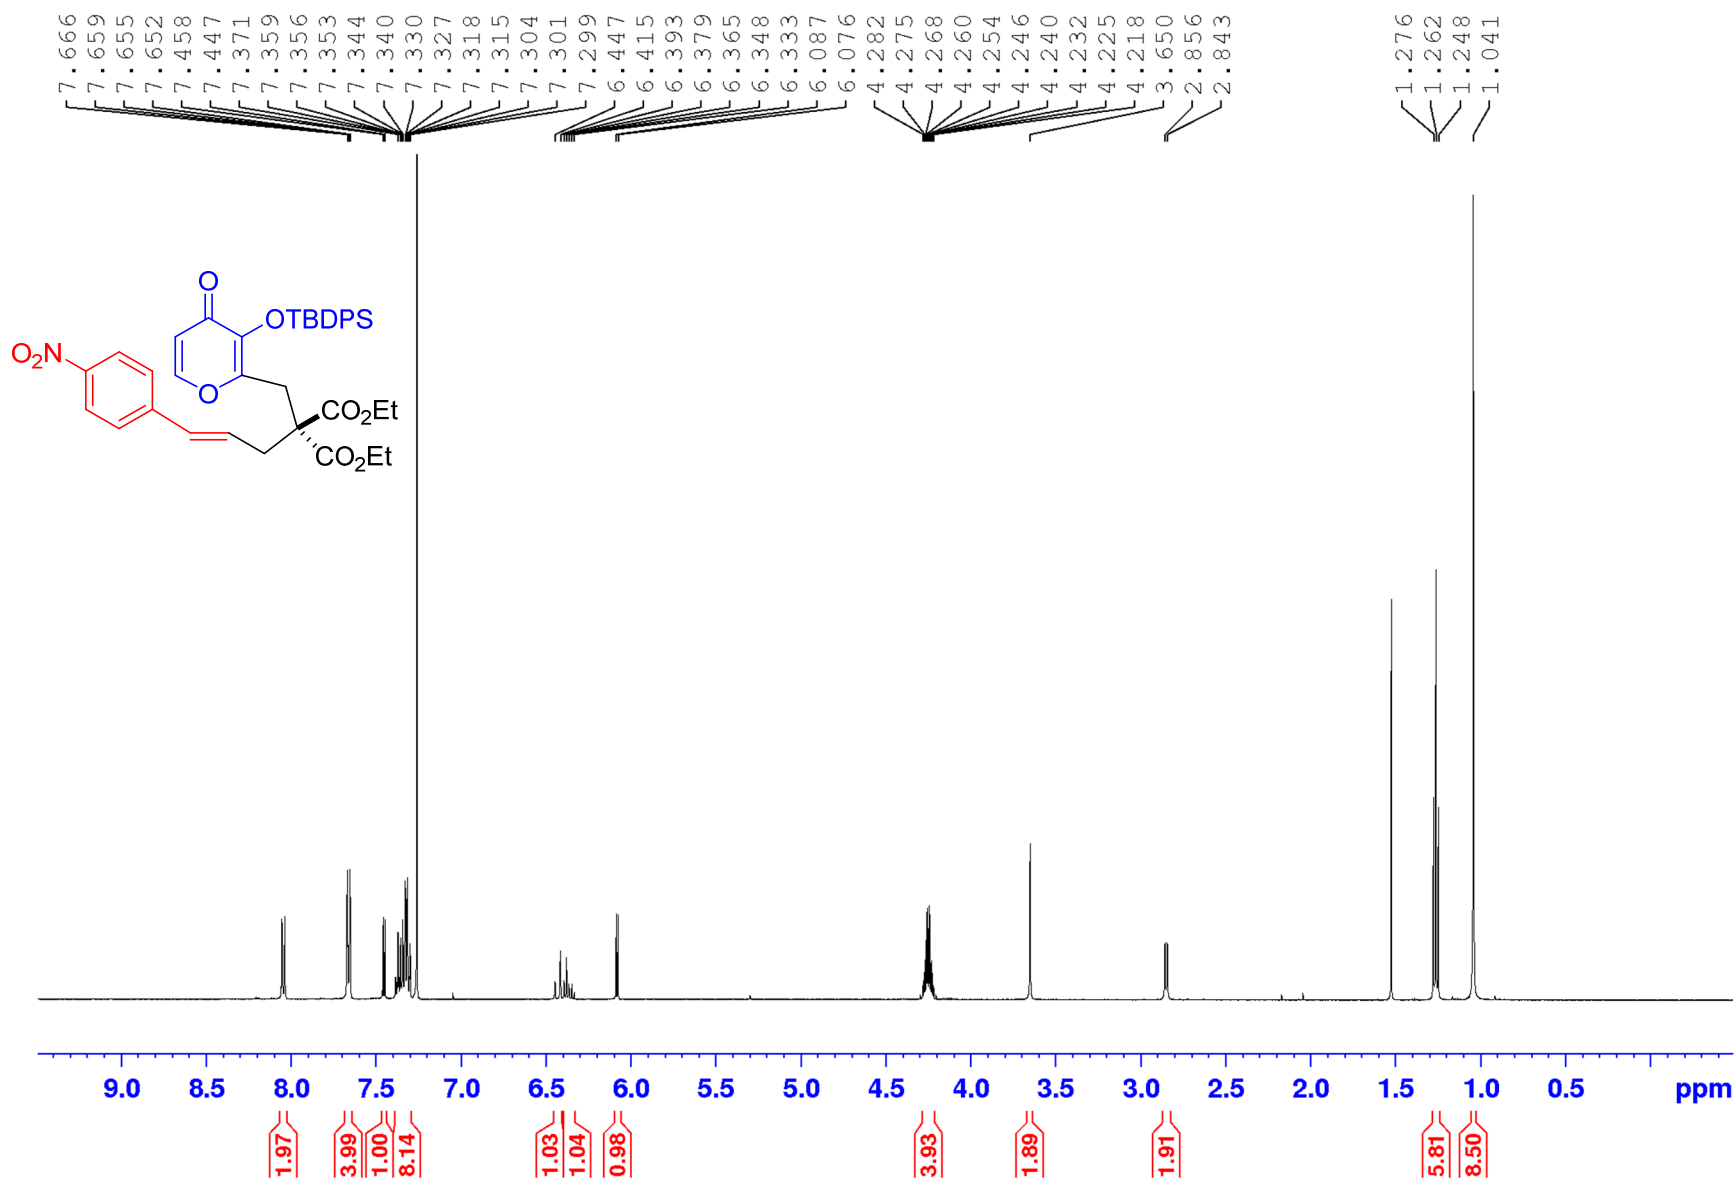

<sup>1</sup>H NMR (500 MHz) of 1z' in CDCl<sub>3</sub>

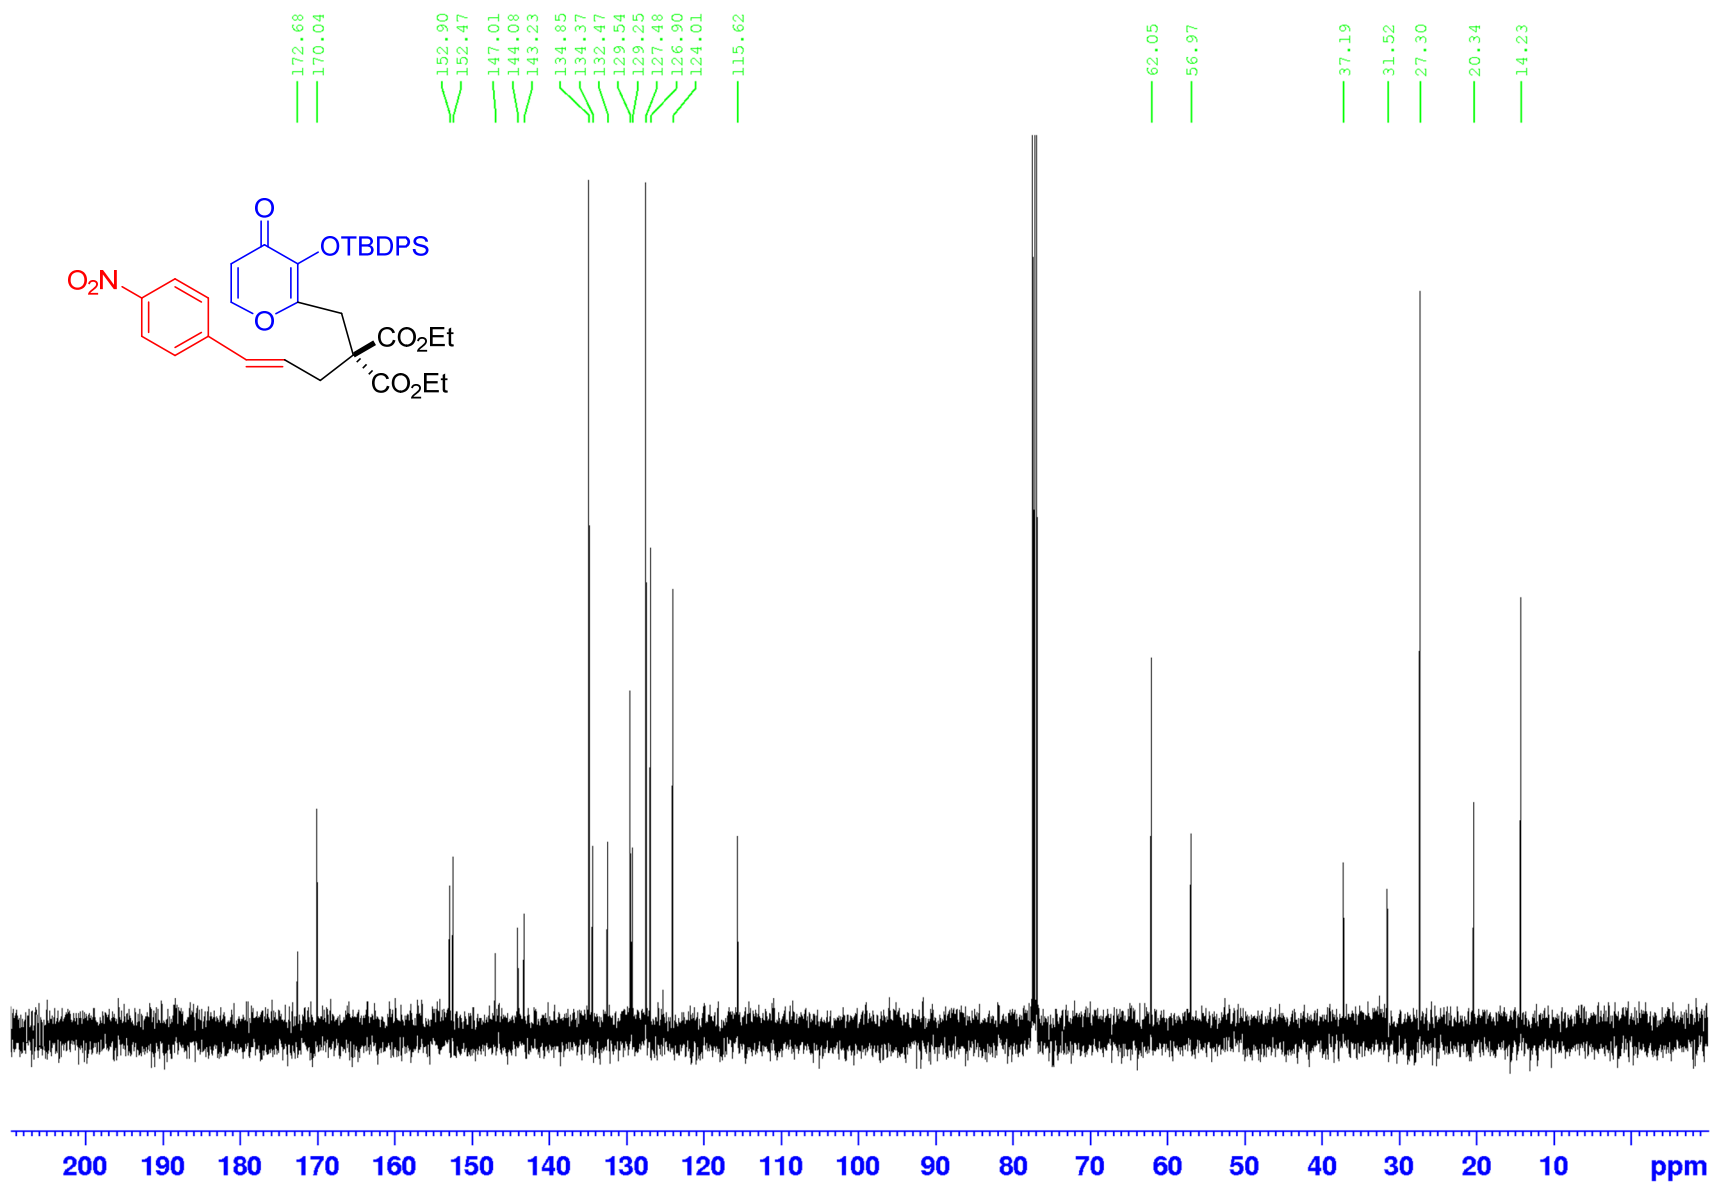

<sup>13</sup>C{<sup>1</sup>H} NMR (125 MHz) of 1z' in CDCl<sub>3</sub>

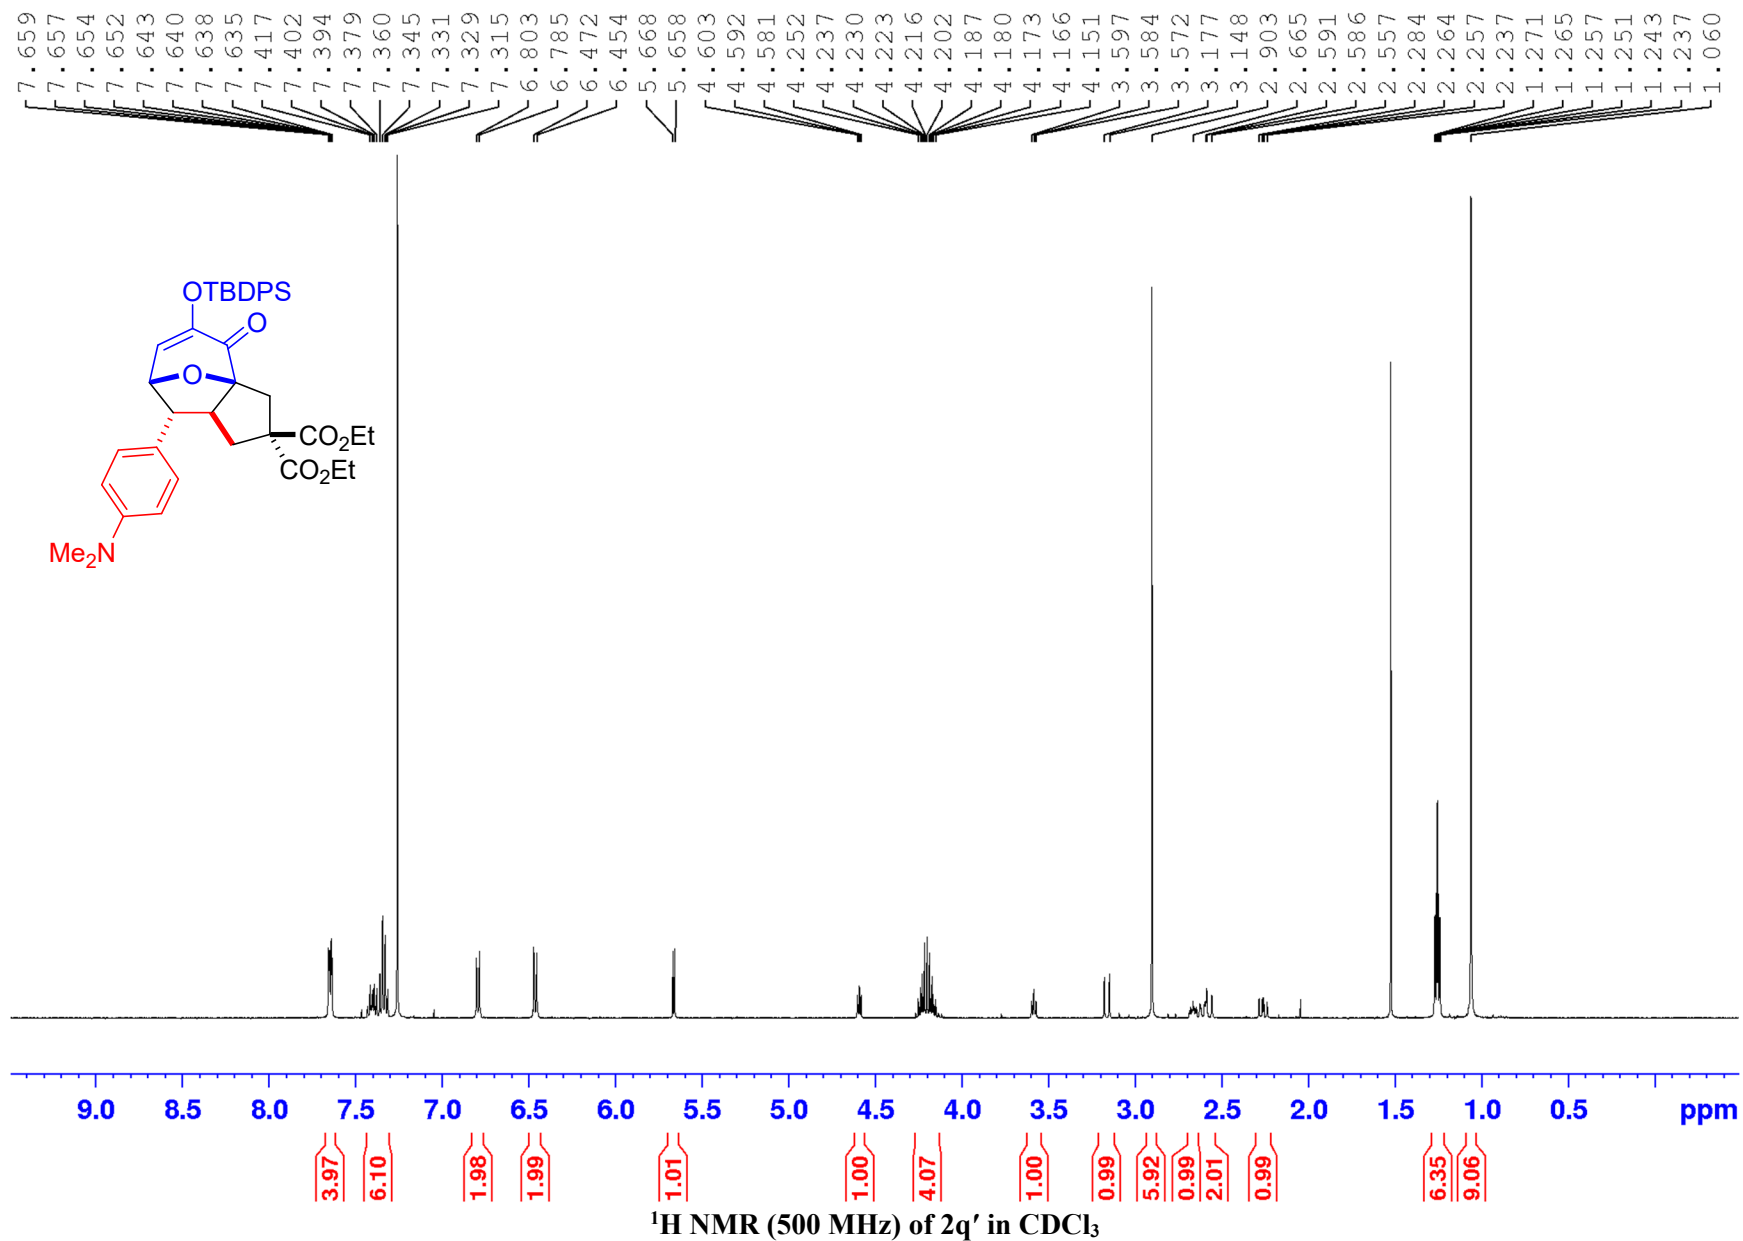

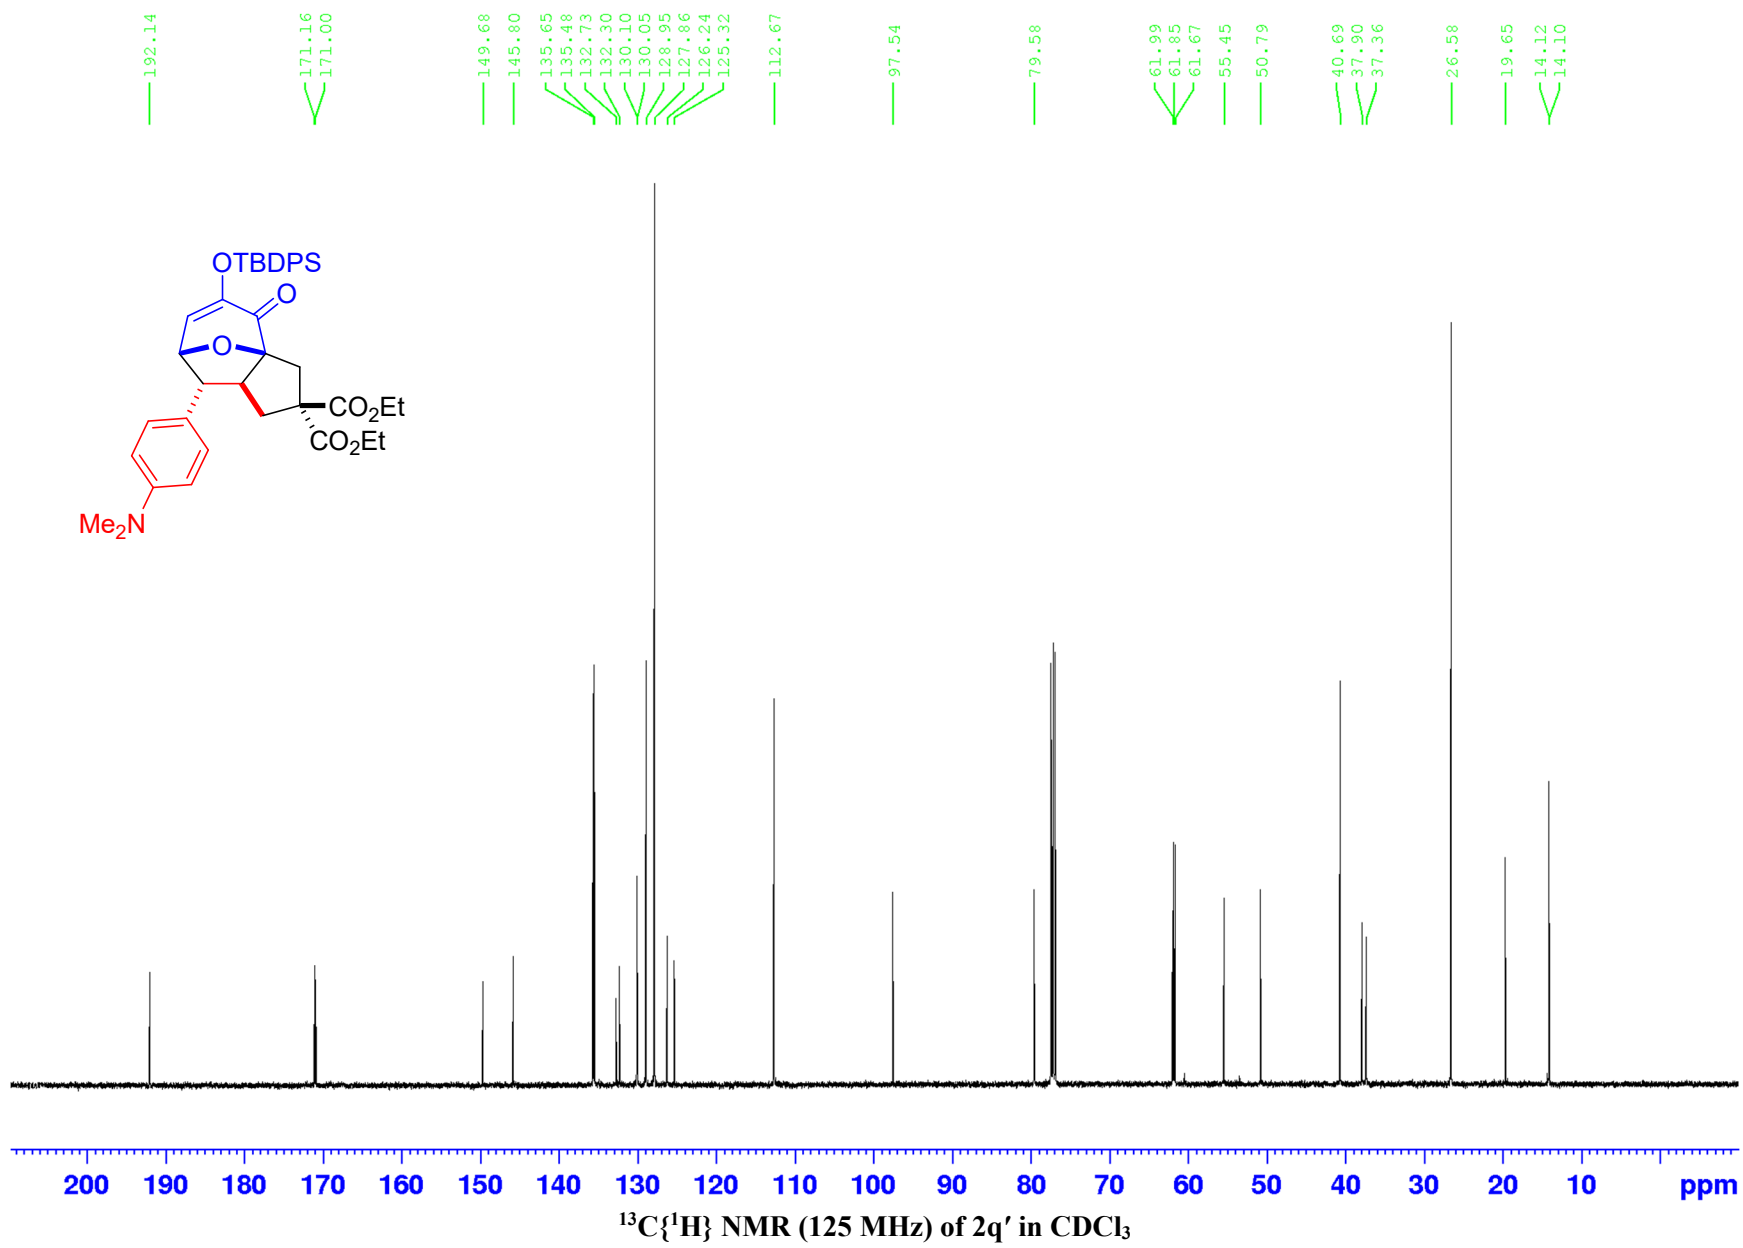

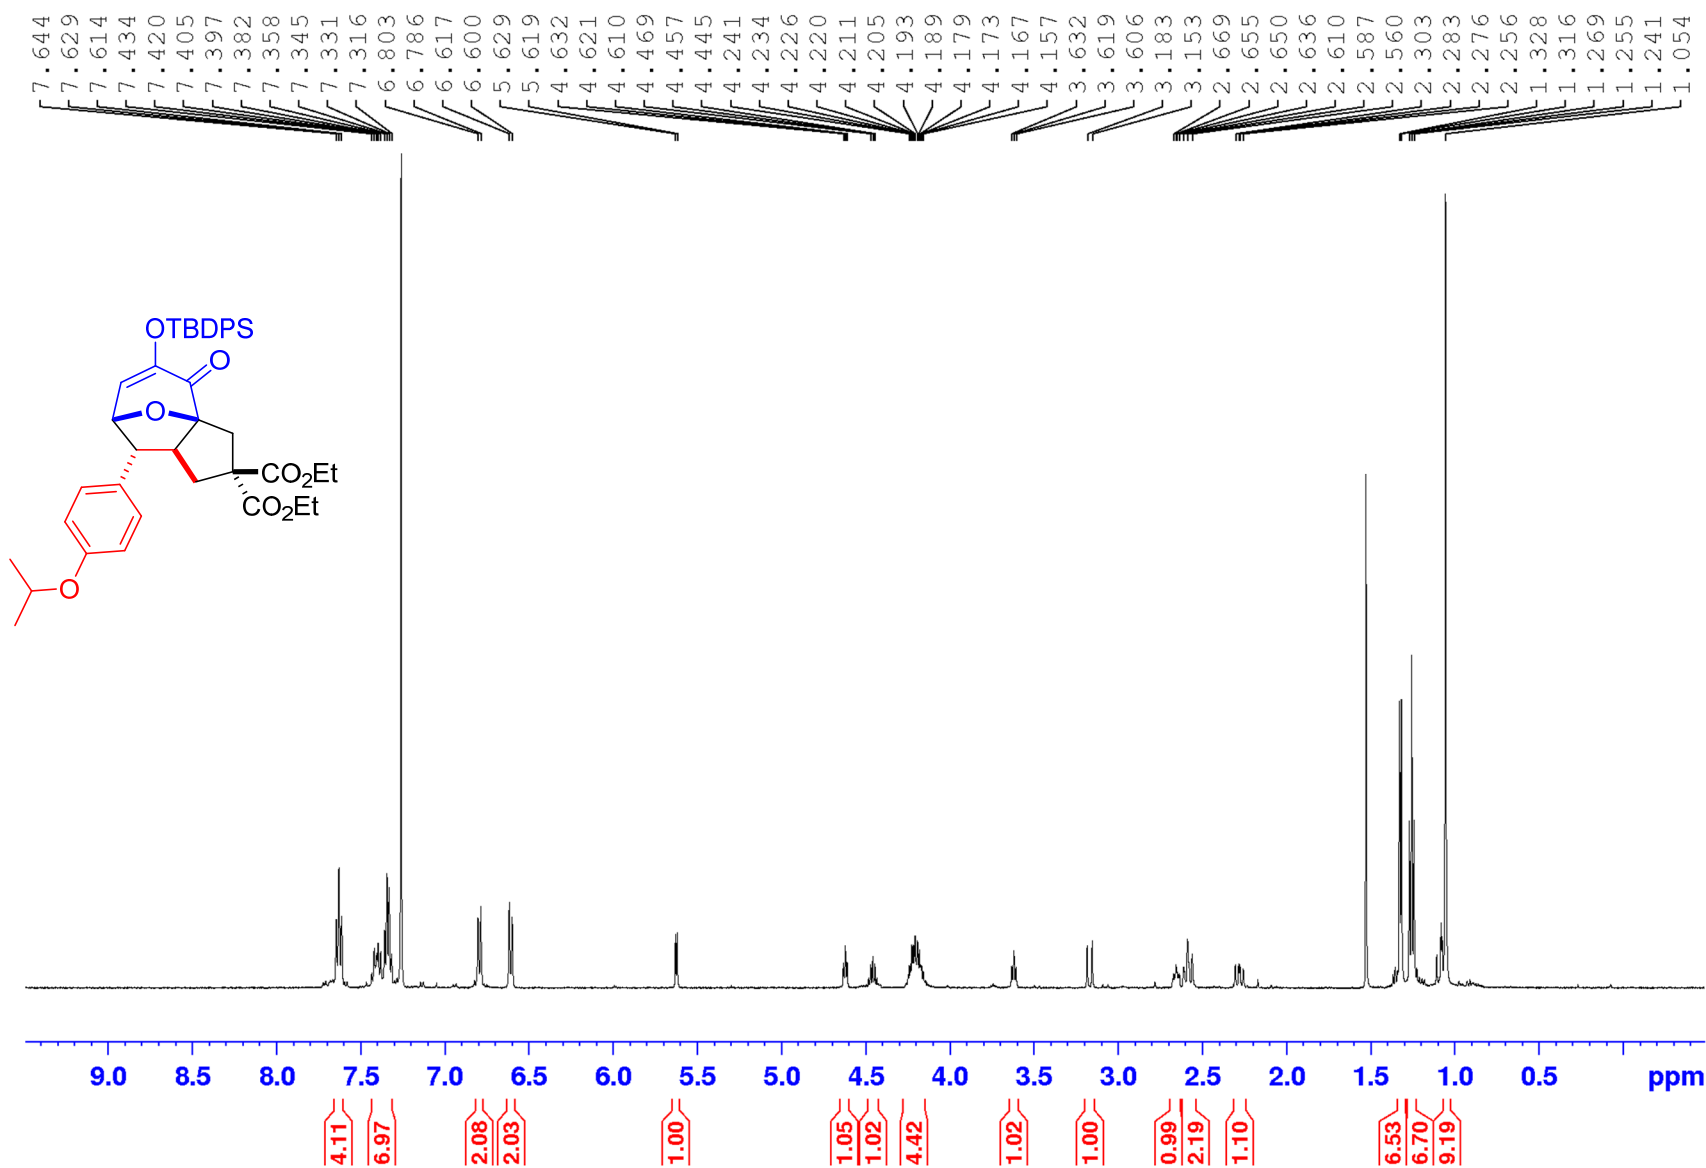

<sup>1</sup>H NMR (500 MHz) of 2r' in CDCl<sub>3</sub>

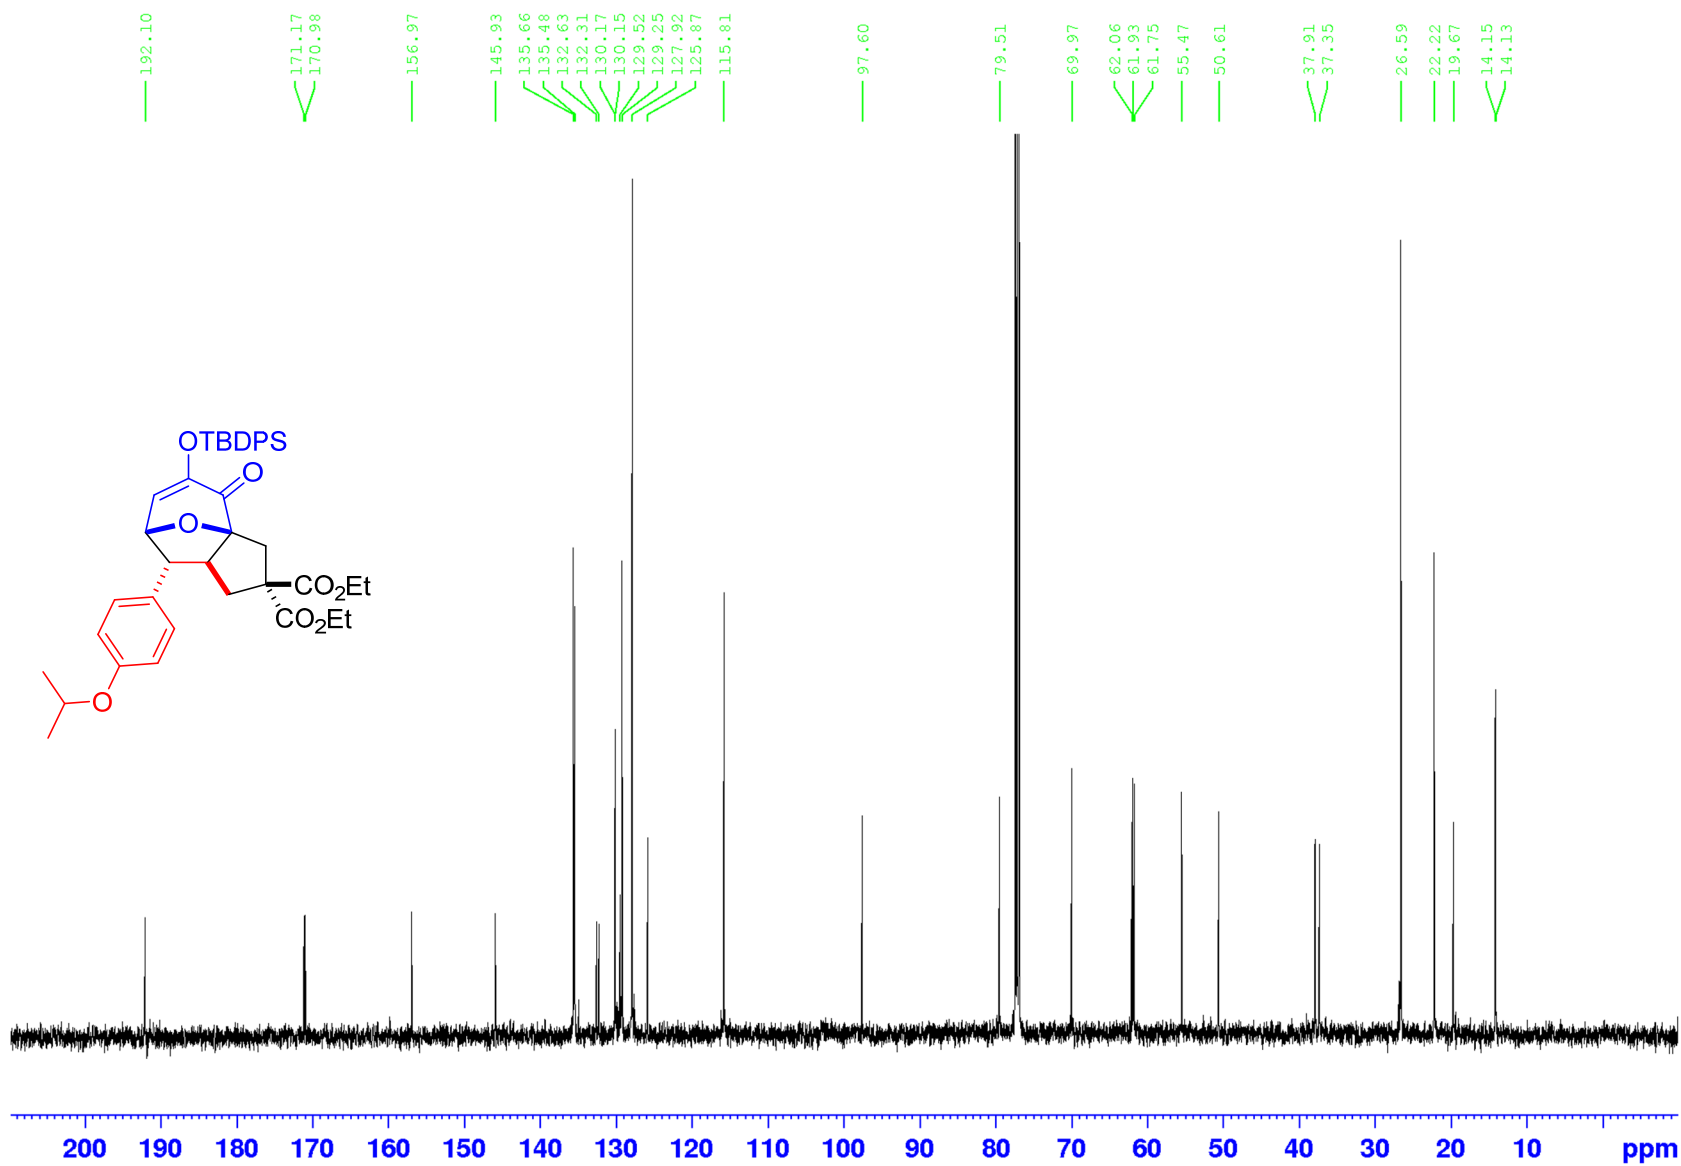

$^{13}\text{C}\{^1\text{H}\}$  NMR (125 MHz) of 2r' in  $\text{CDCl}_3$

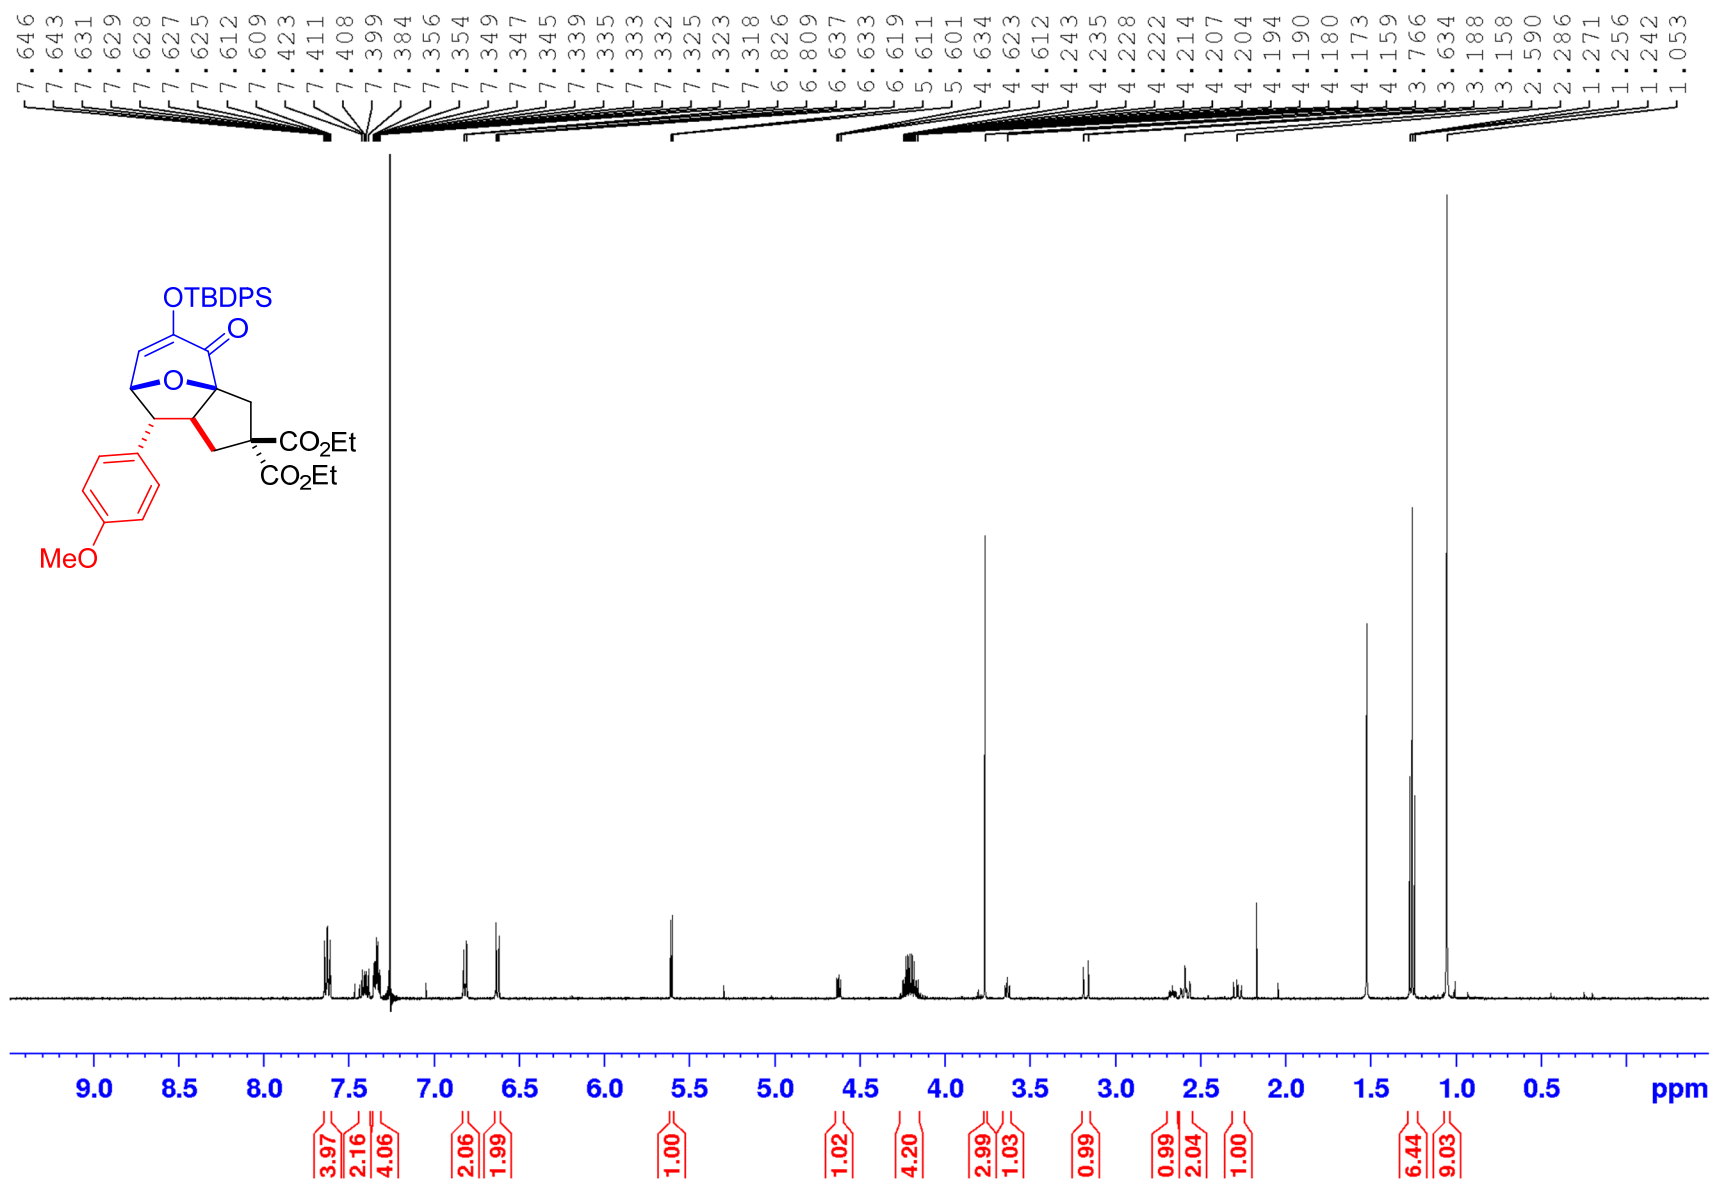

<sup>1</sup>H NMR (500 MHz) of **2s'** in CDCl<sub>3</sub>

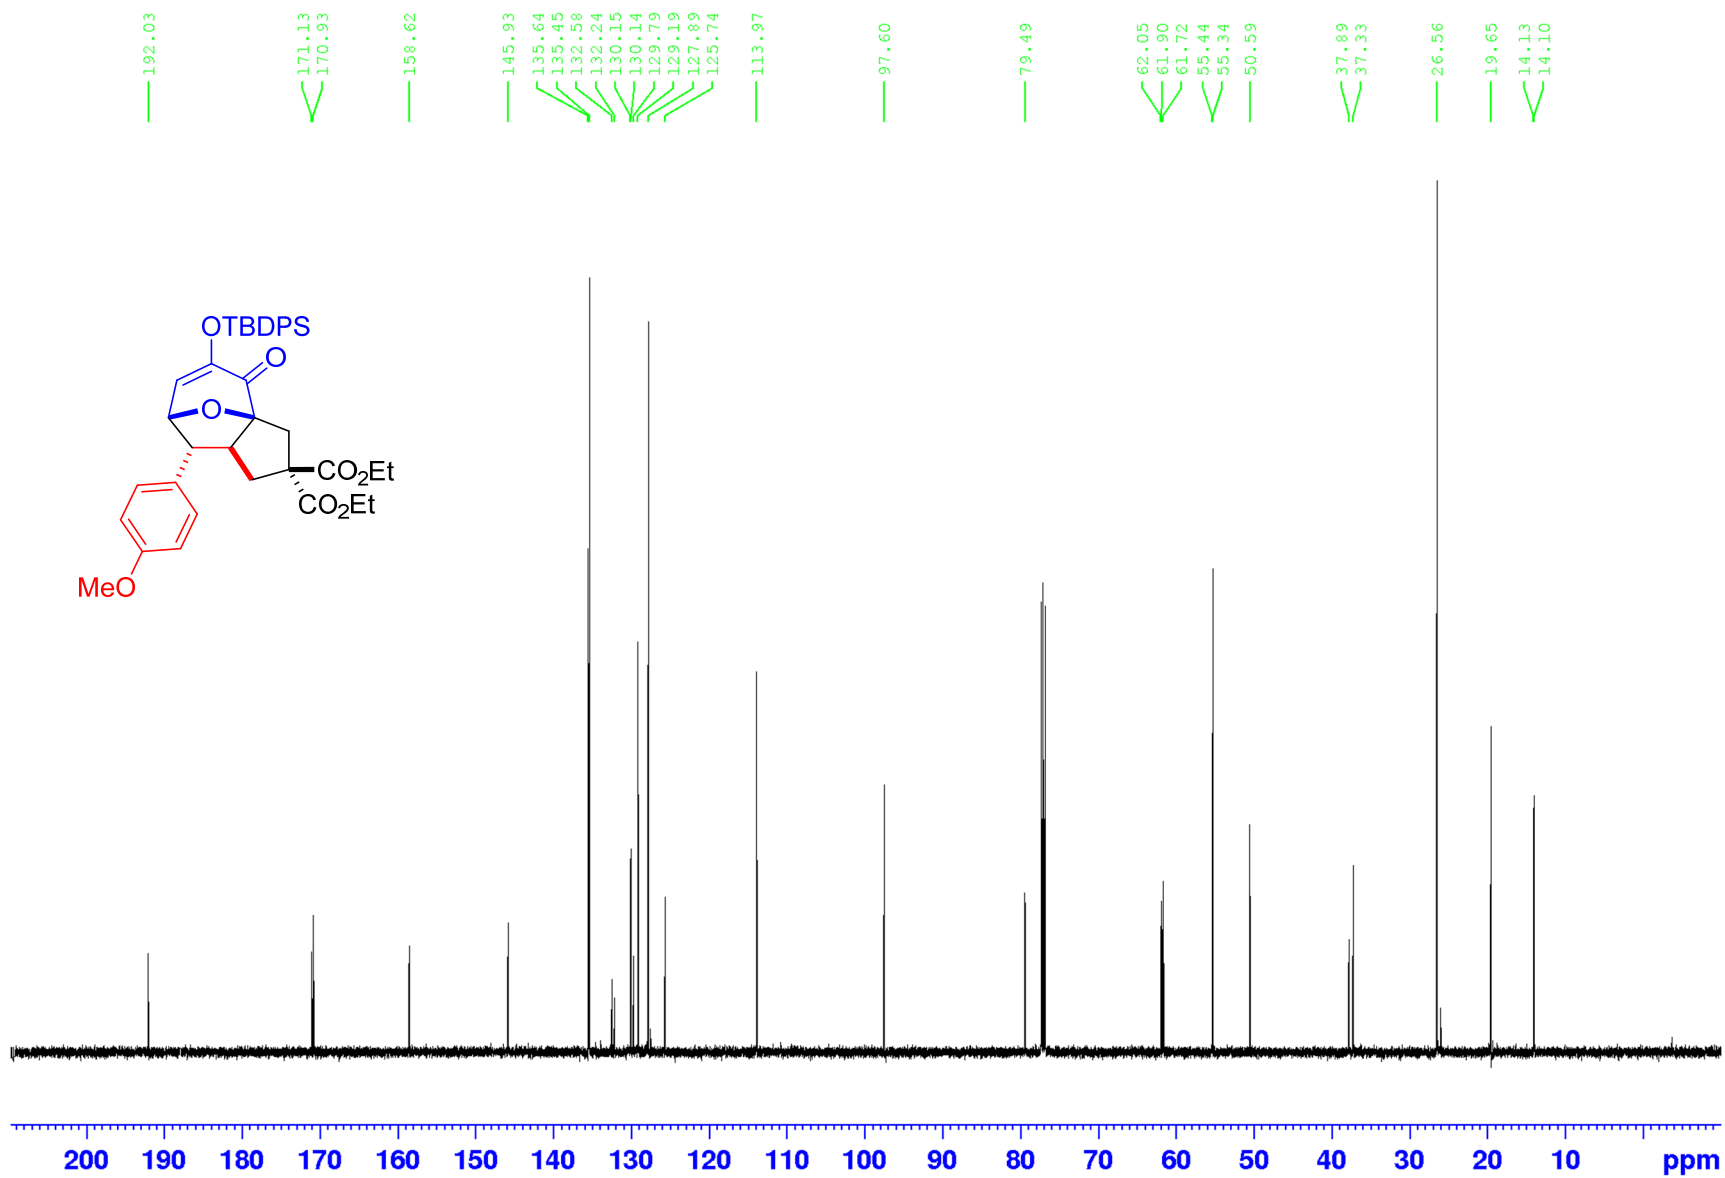

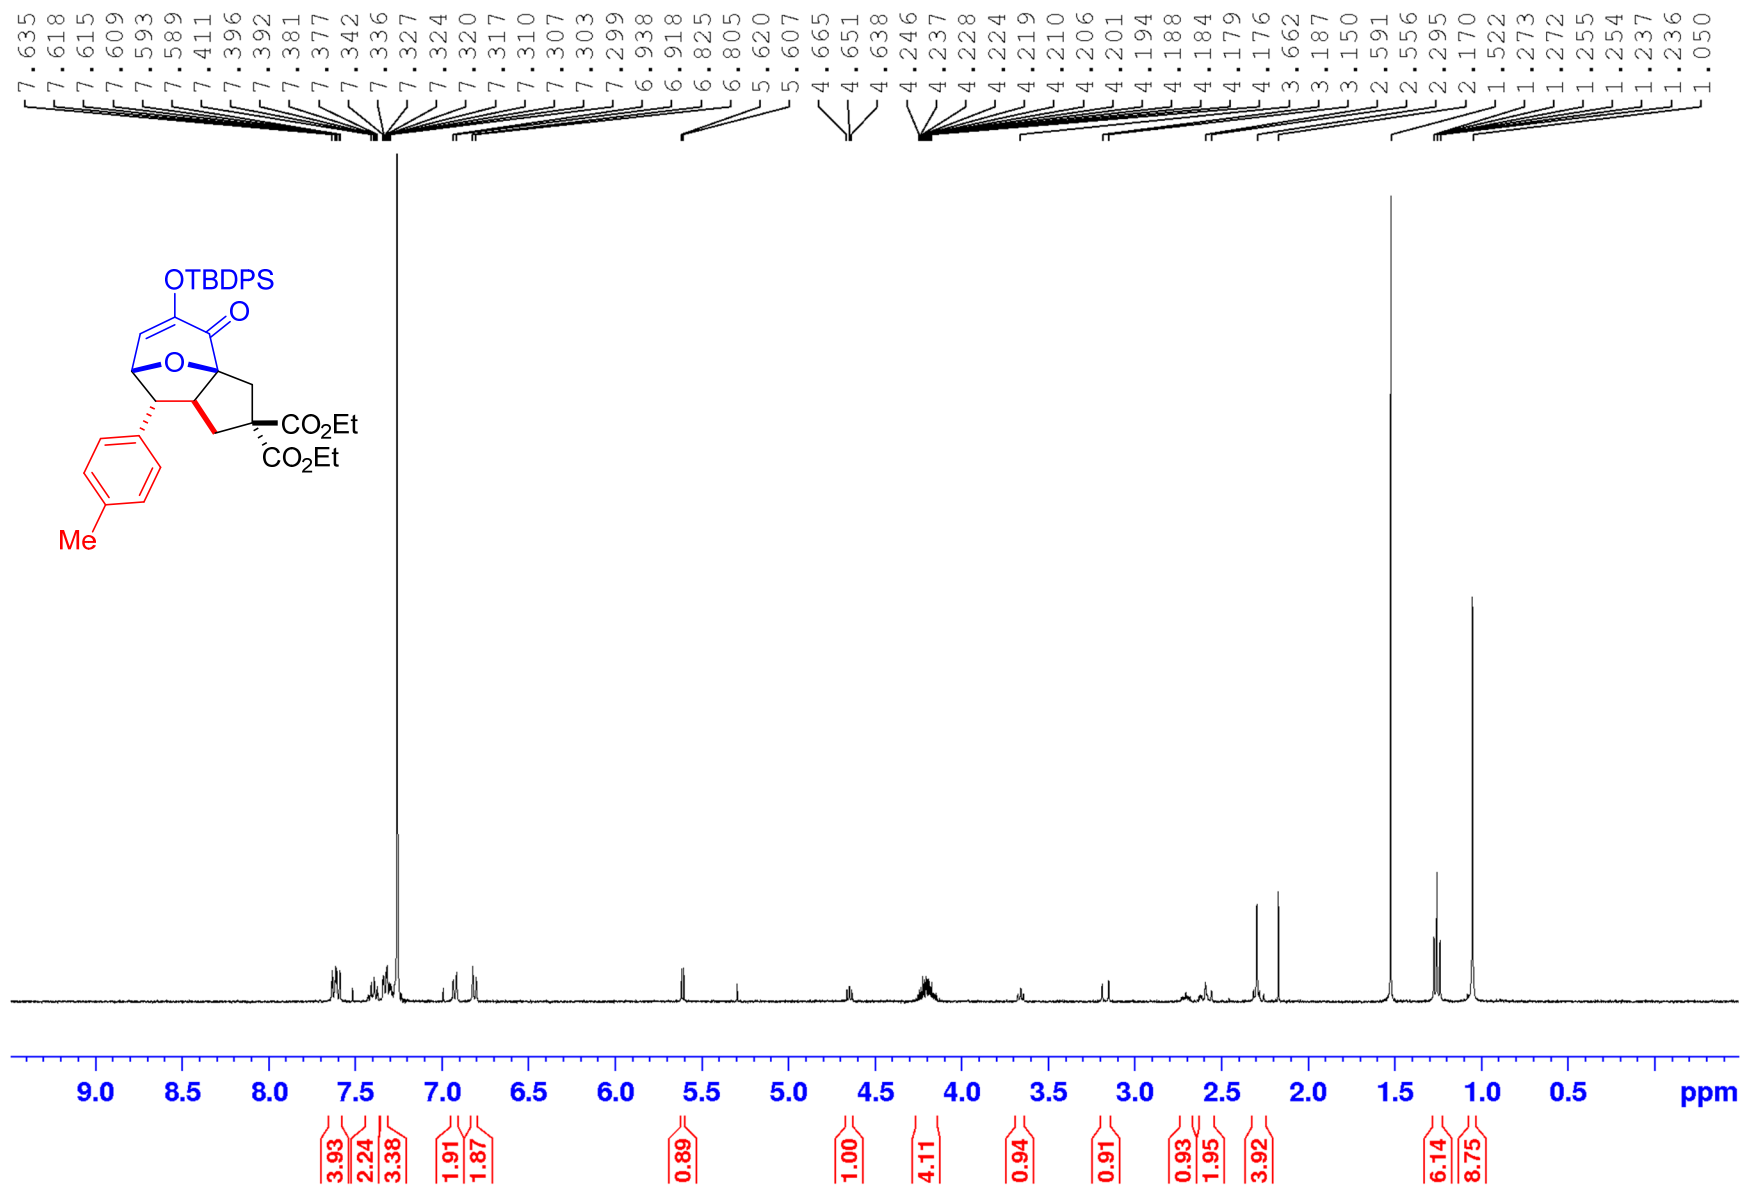

<sup>1</sup>H NMR (500 MHz) of 2t' in CDCl<sub>3</sub>

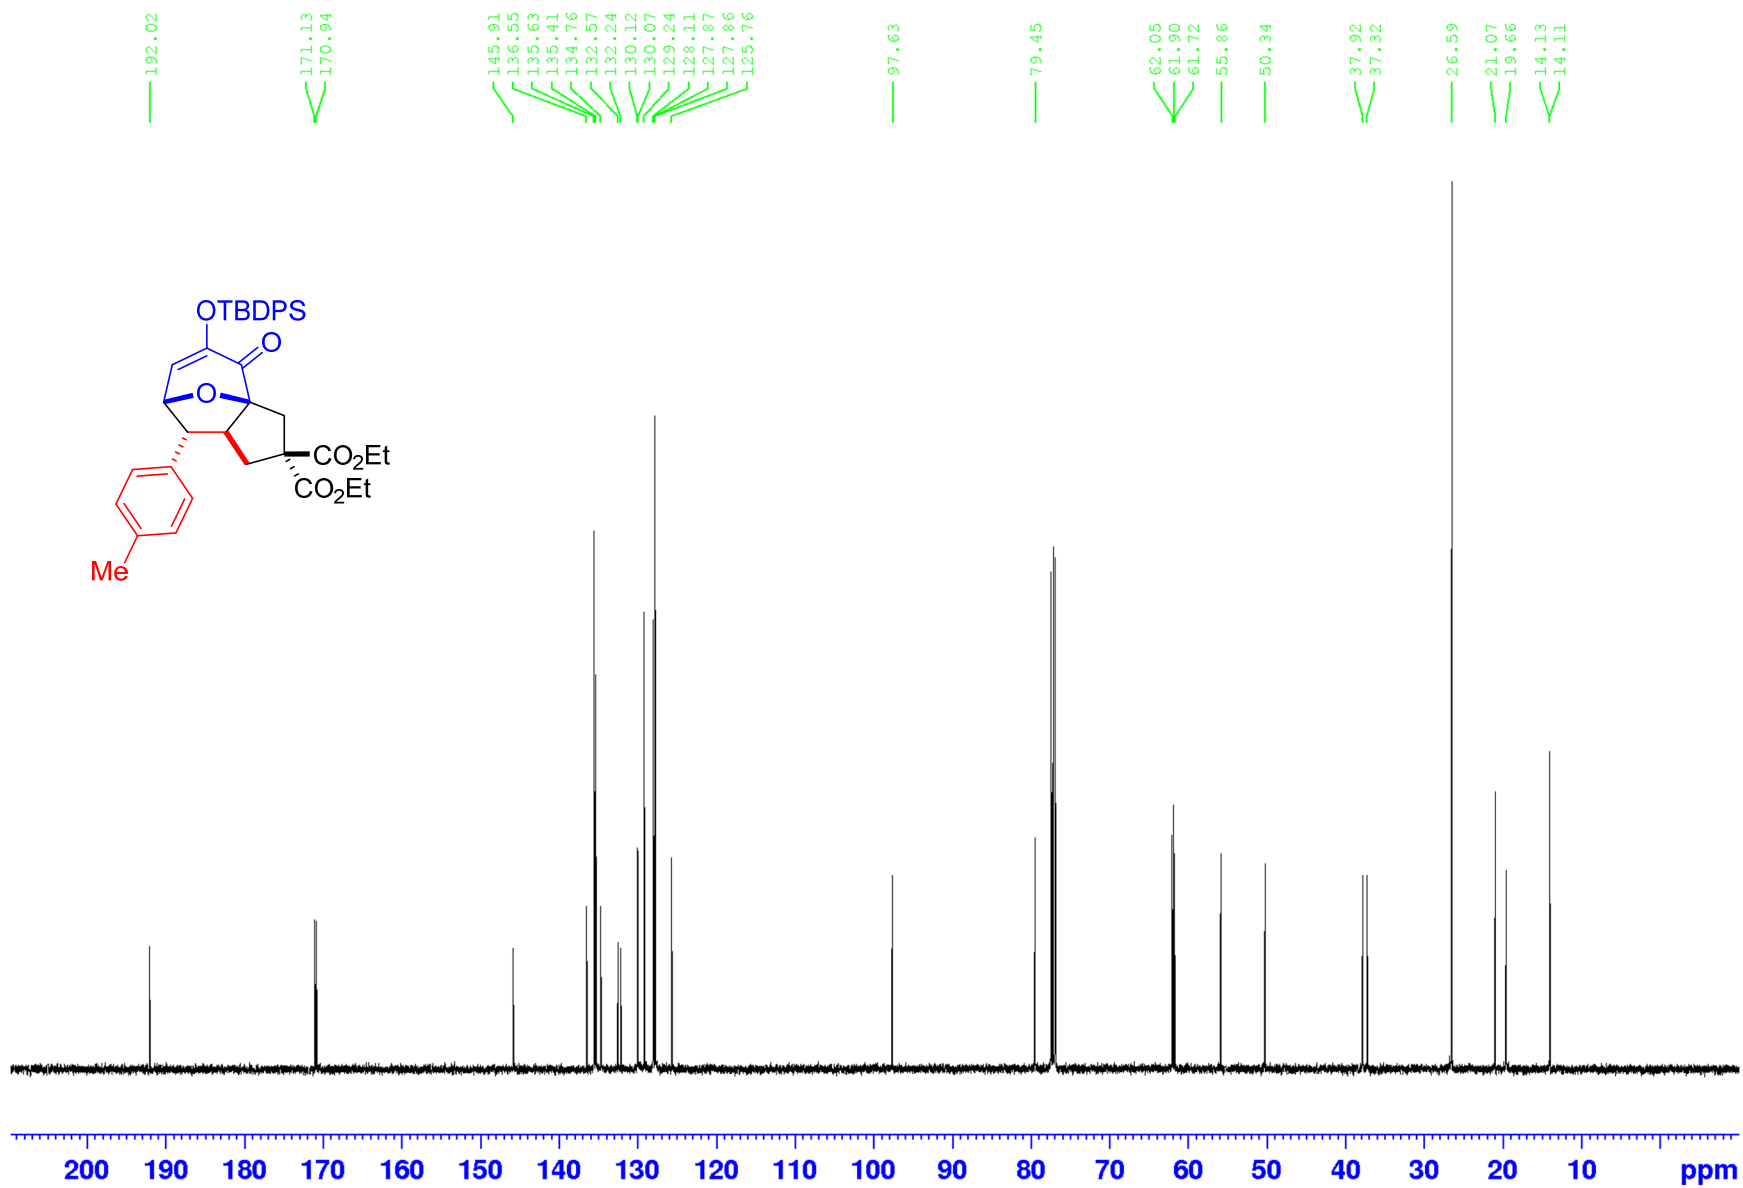

$^{13}\text{C}\{^1\text{H}\}$  NMR (125 MHz) of 2t' in  $\text{CDCl}_3$

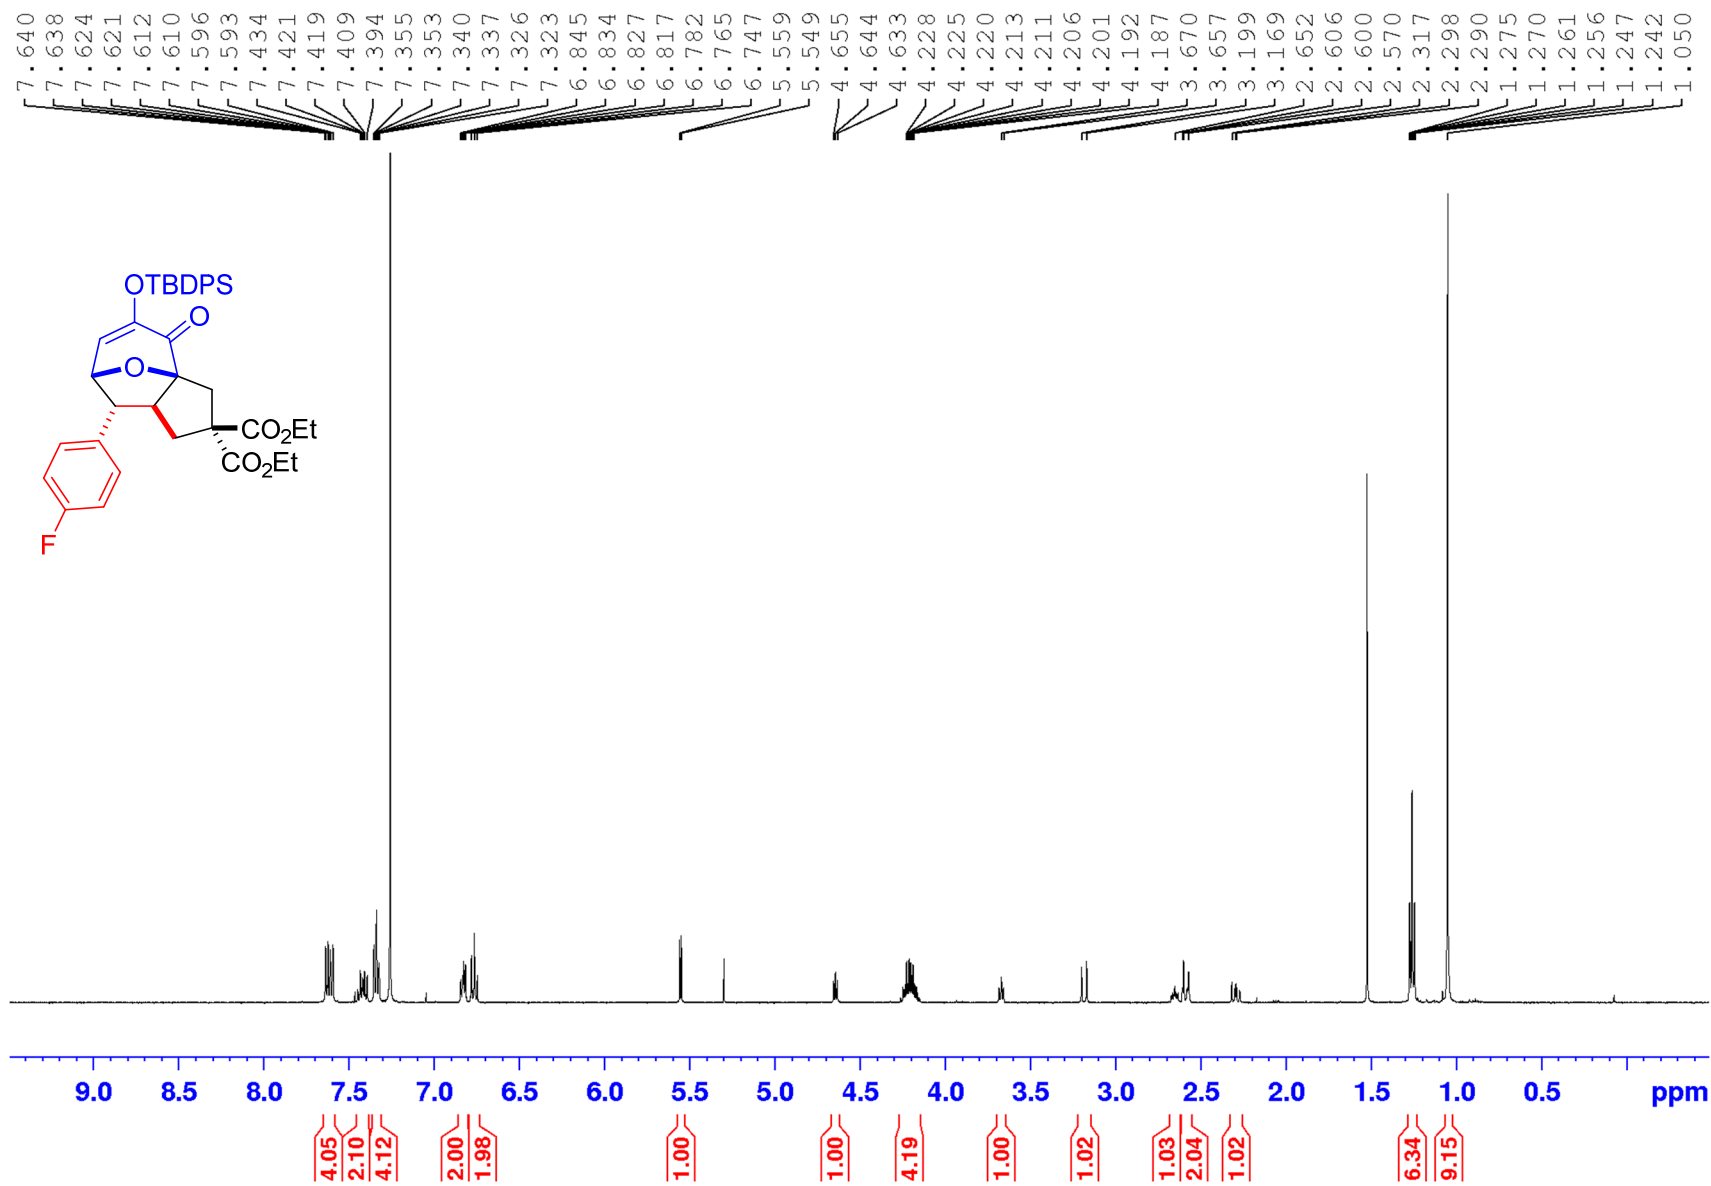

<sup>1</sup>H NMR (500 MHz) of **2v'** in CDCl<sub>3</sub>

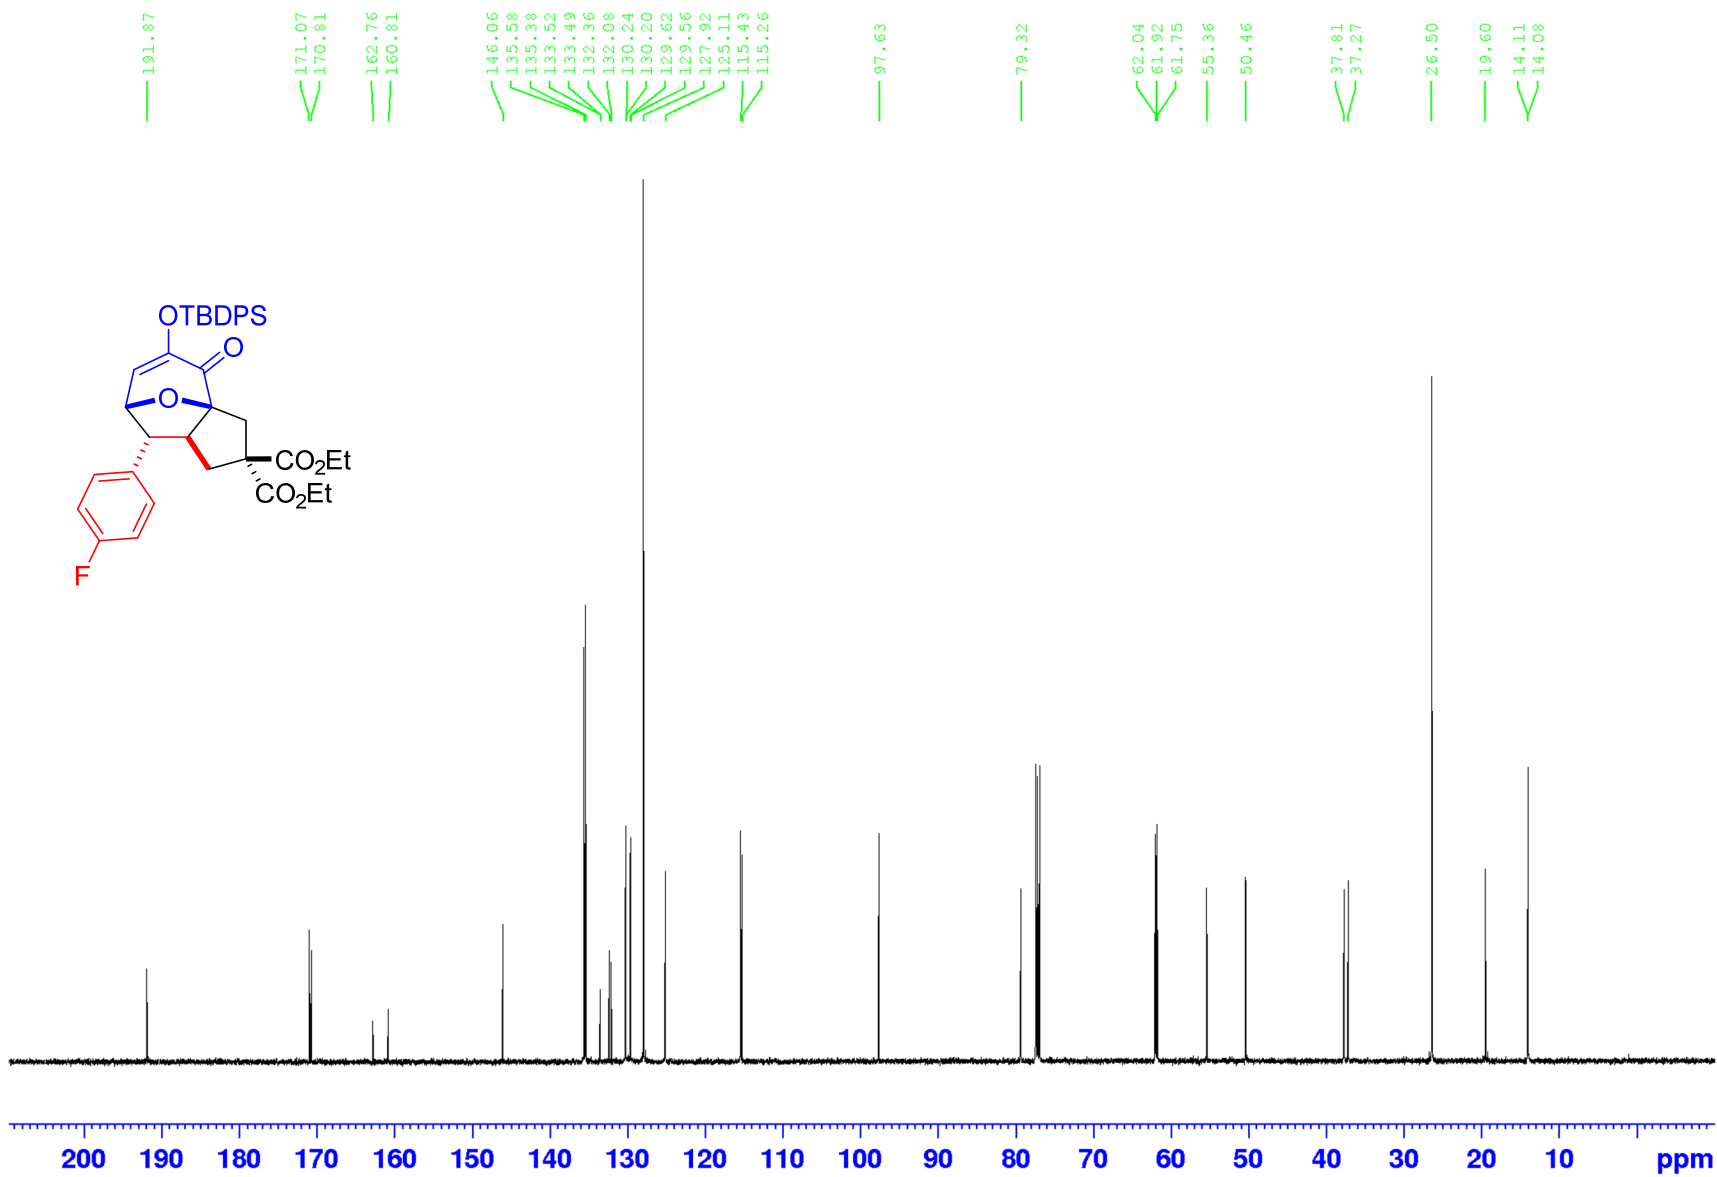

<sup>13</sup>C{<sup>1</sup>H} NMR (125 MHz) of 2v' in CDCl<sub>3</sub>

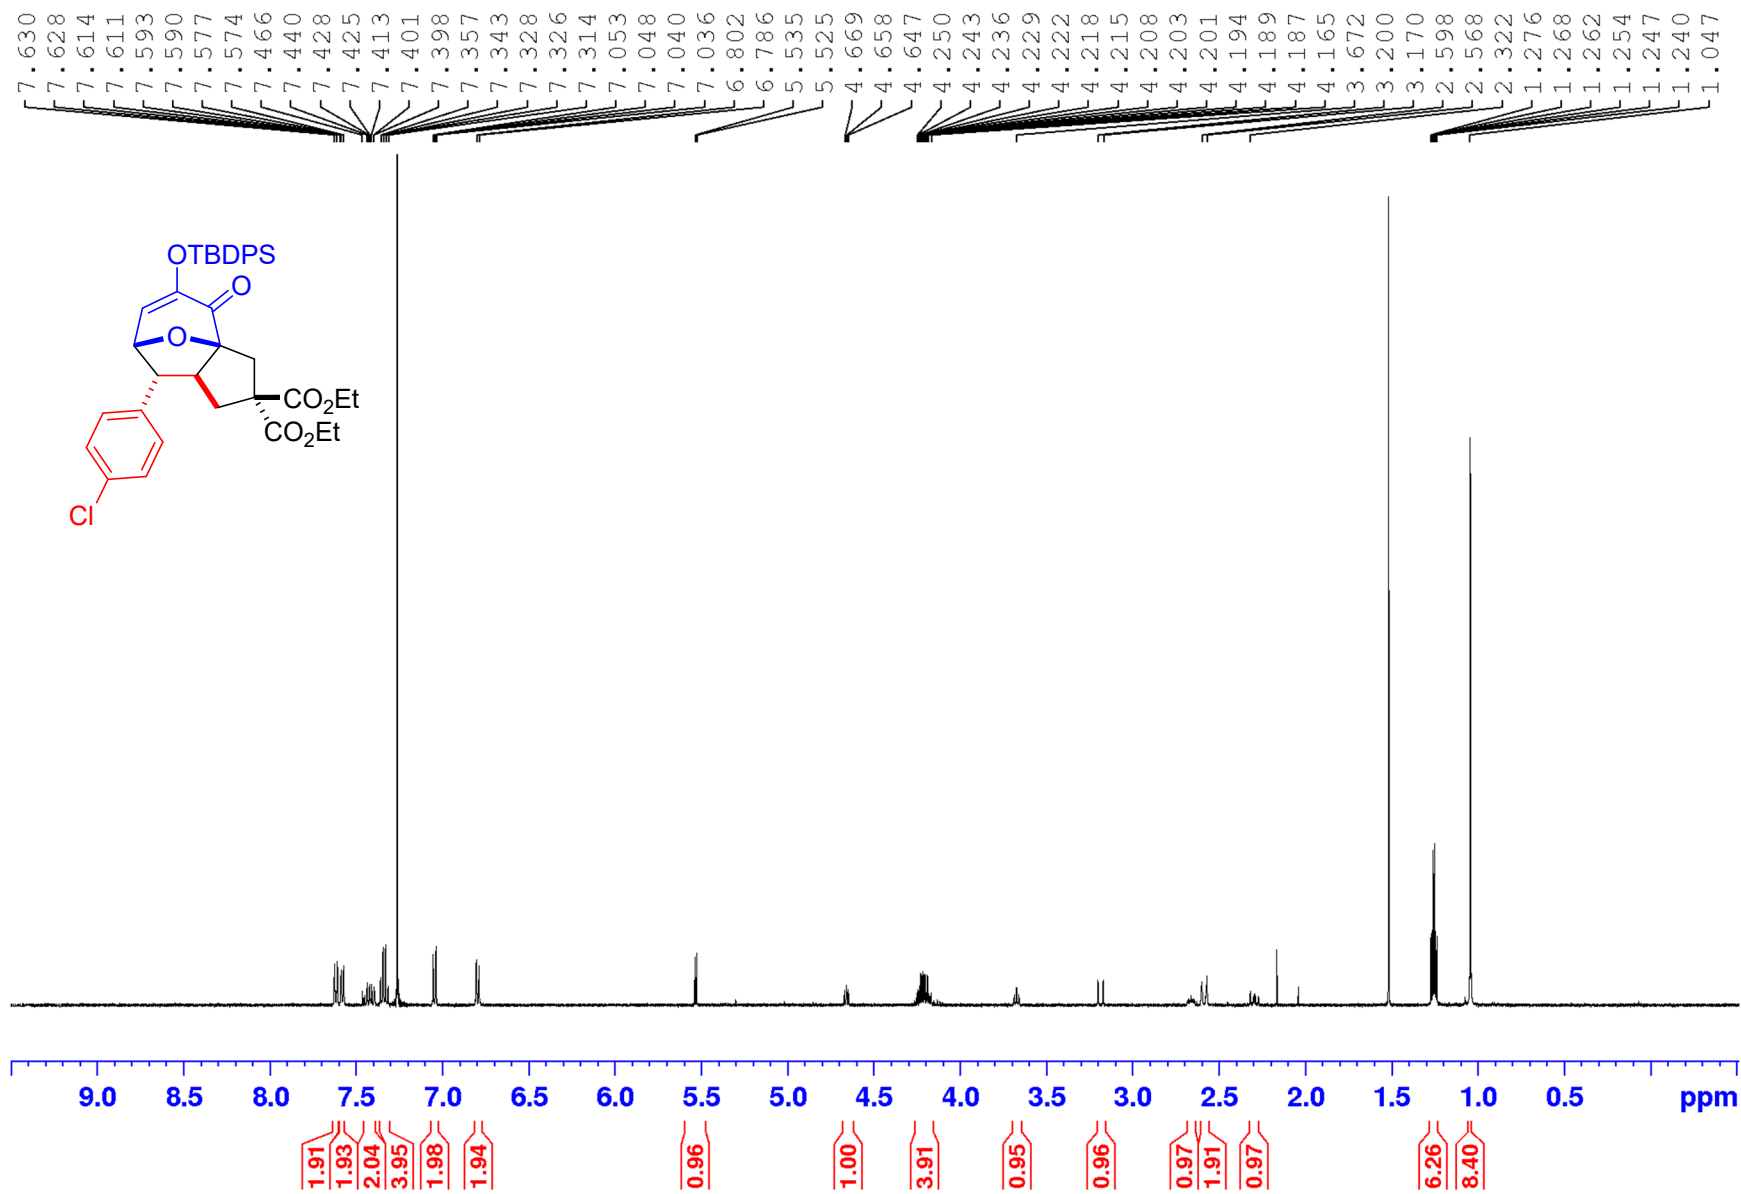

<sup>1</sup>H NMR (500 MHz) of 2w' in CDCl<sub>3</sub>

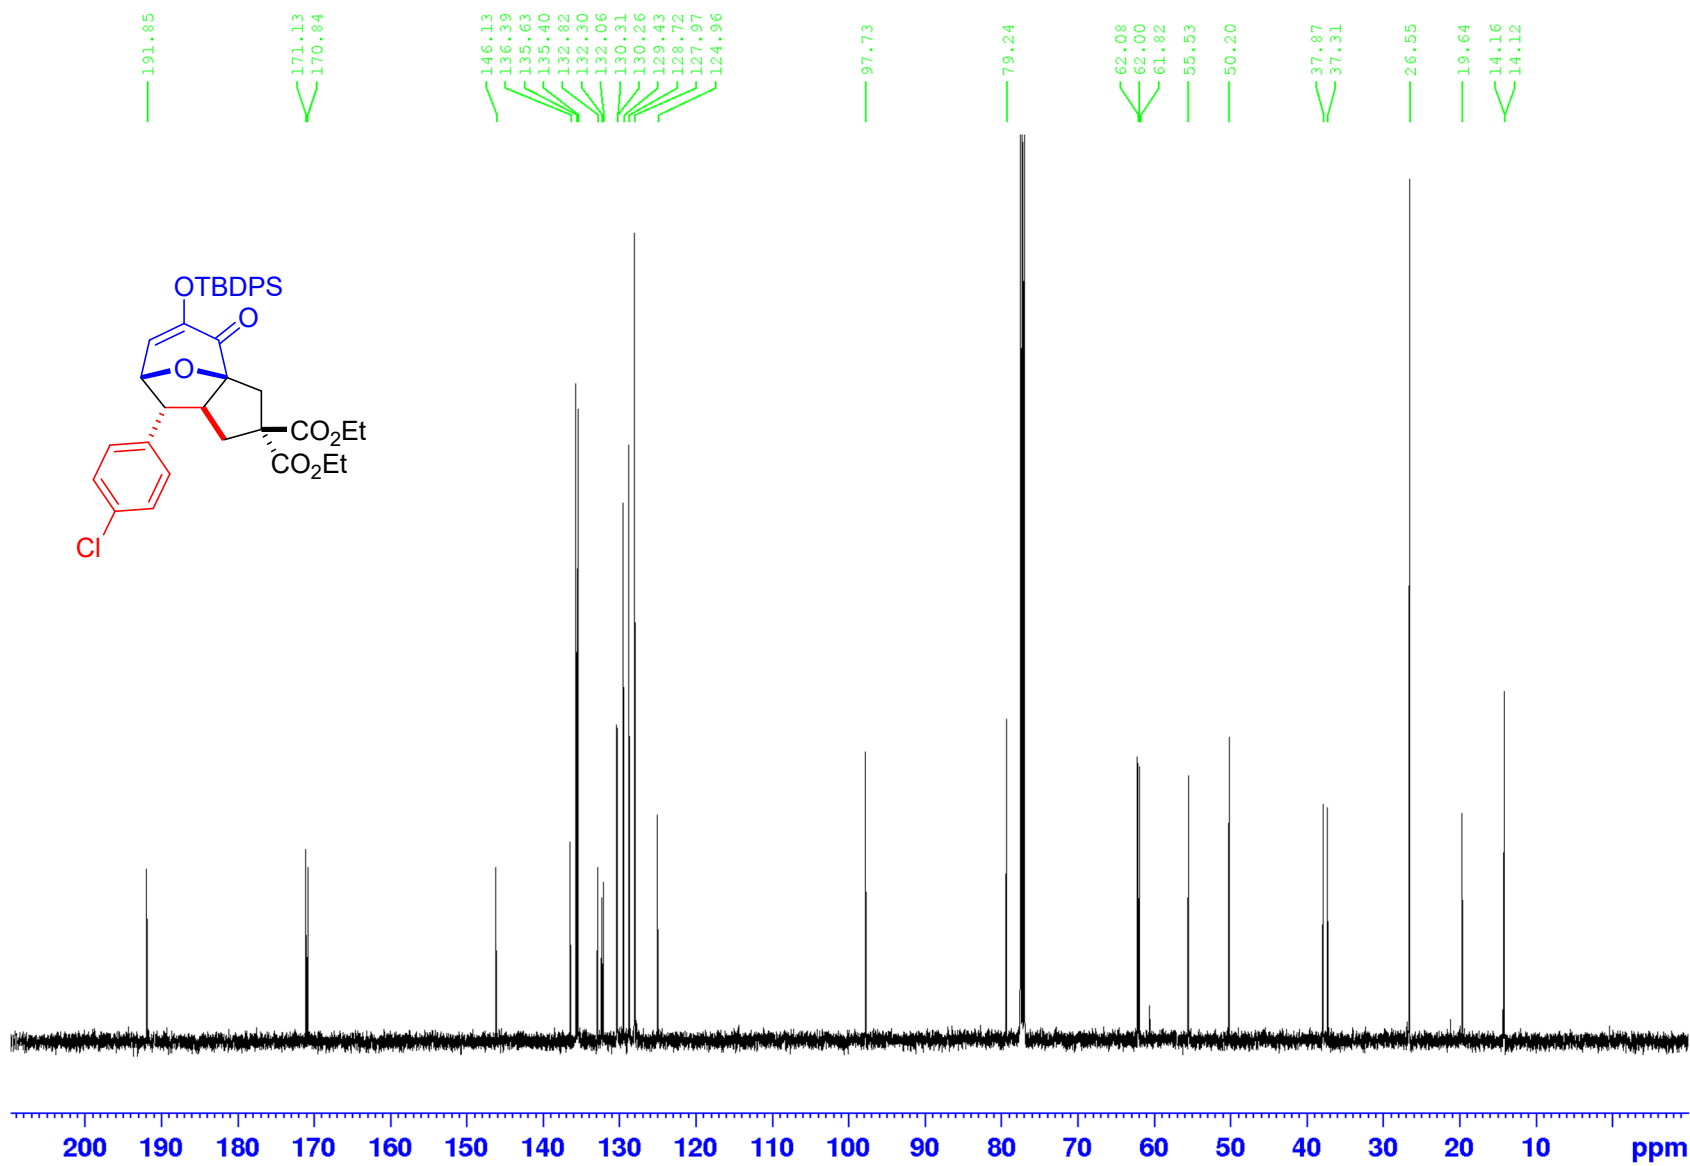

<sup>13</sup>C{<sup>1</sup>H} NMR (125 MHz) of 2w' in CDCl<sub>3</sub>

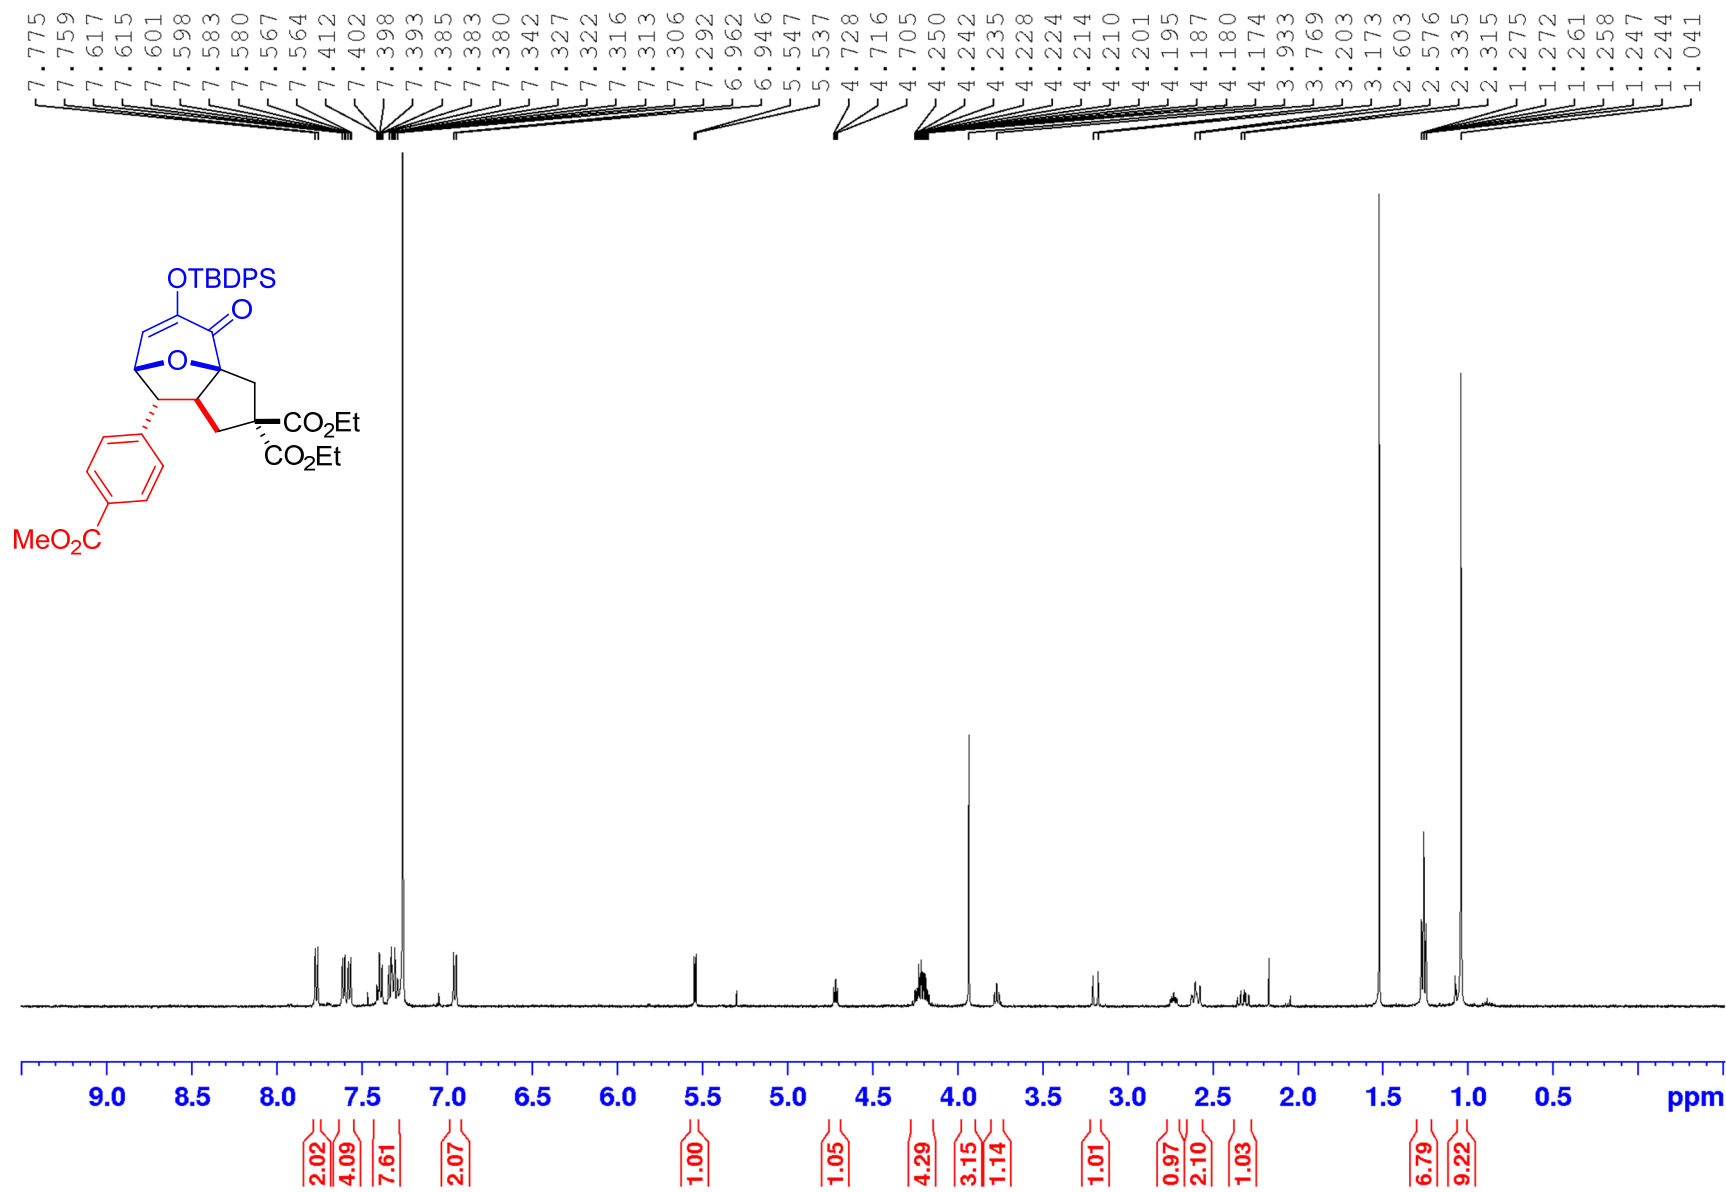

<sup>1</sup>H NMR (500 MHz) of 2x' in CDCl<sub>3</sub>

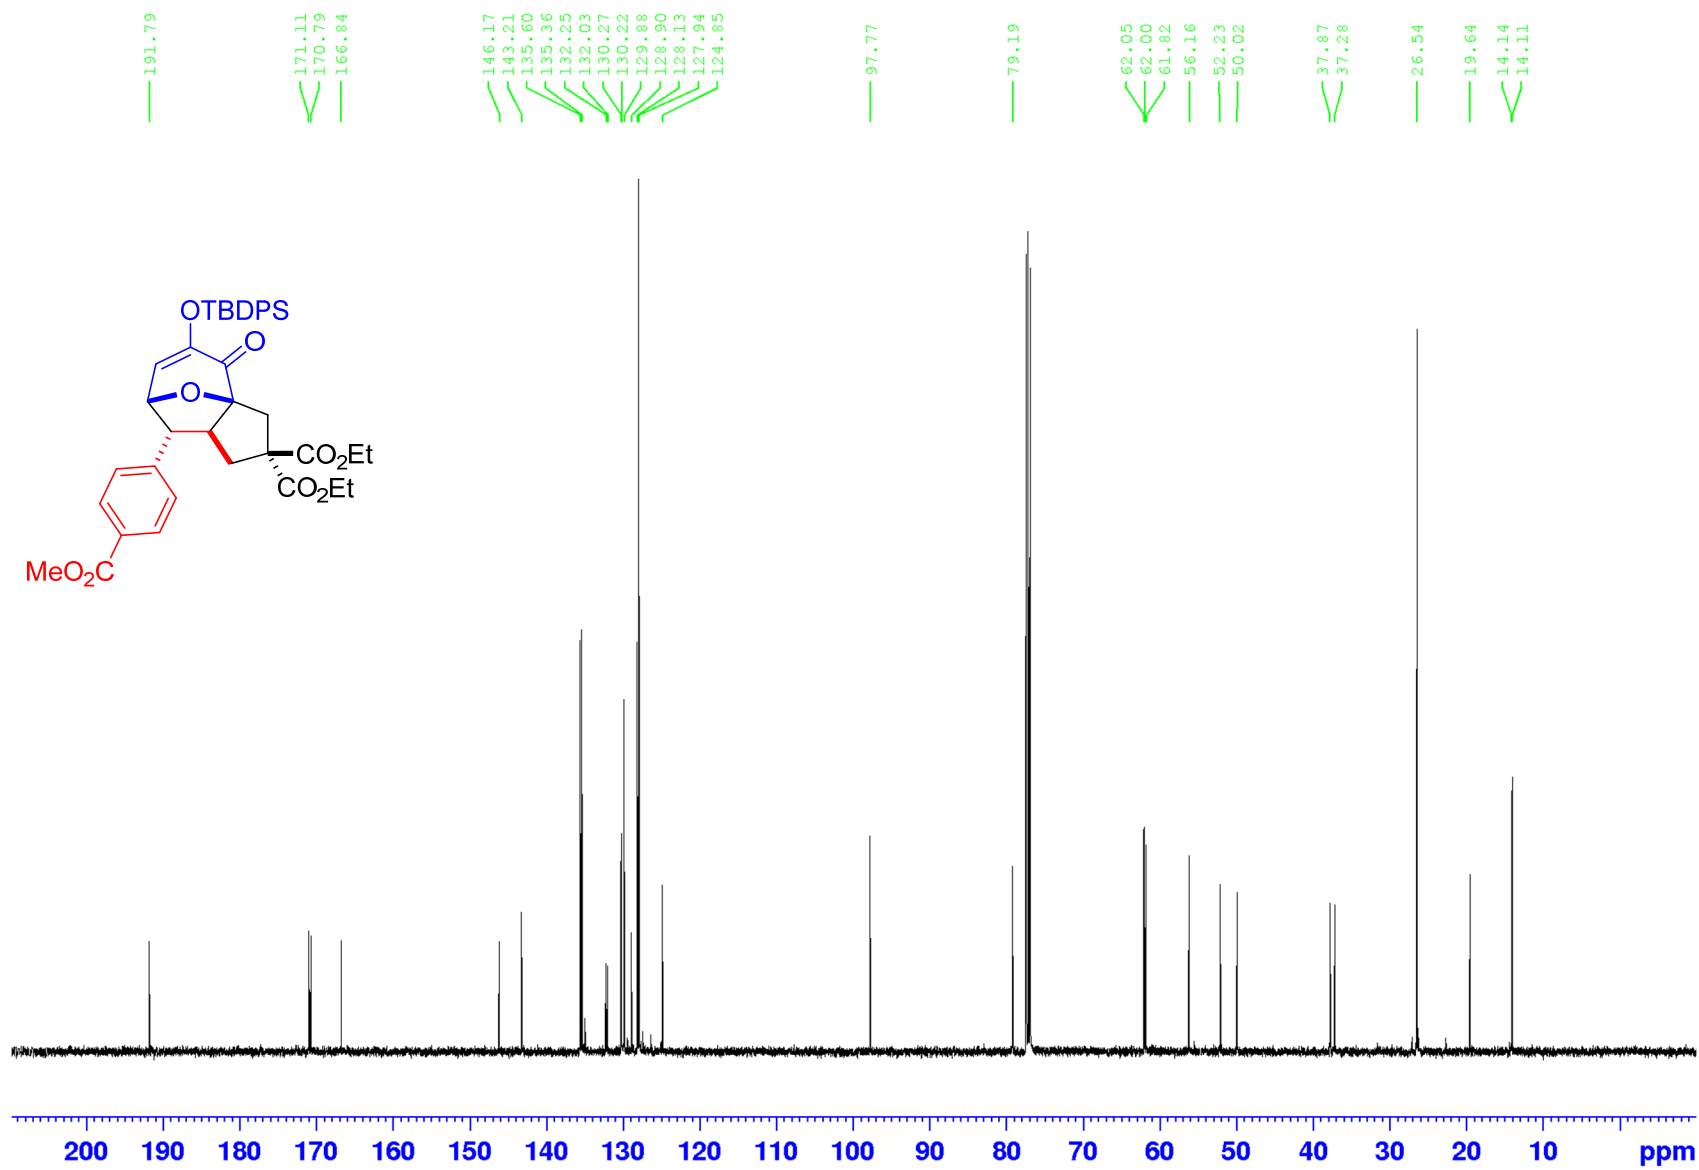

$^{13}\text{C}\{^1\text{H}\}$  NMR (125 MHz) of **2x'** in  $\text{CDCl}_3$

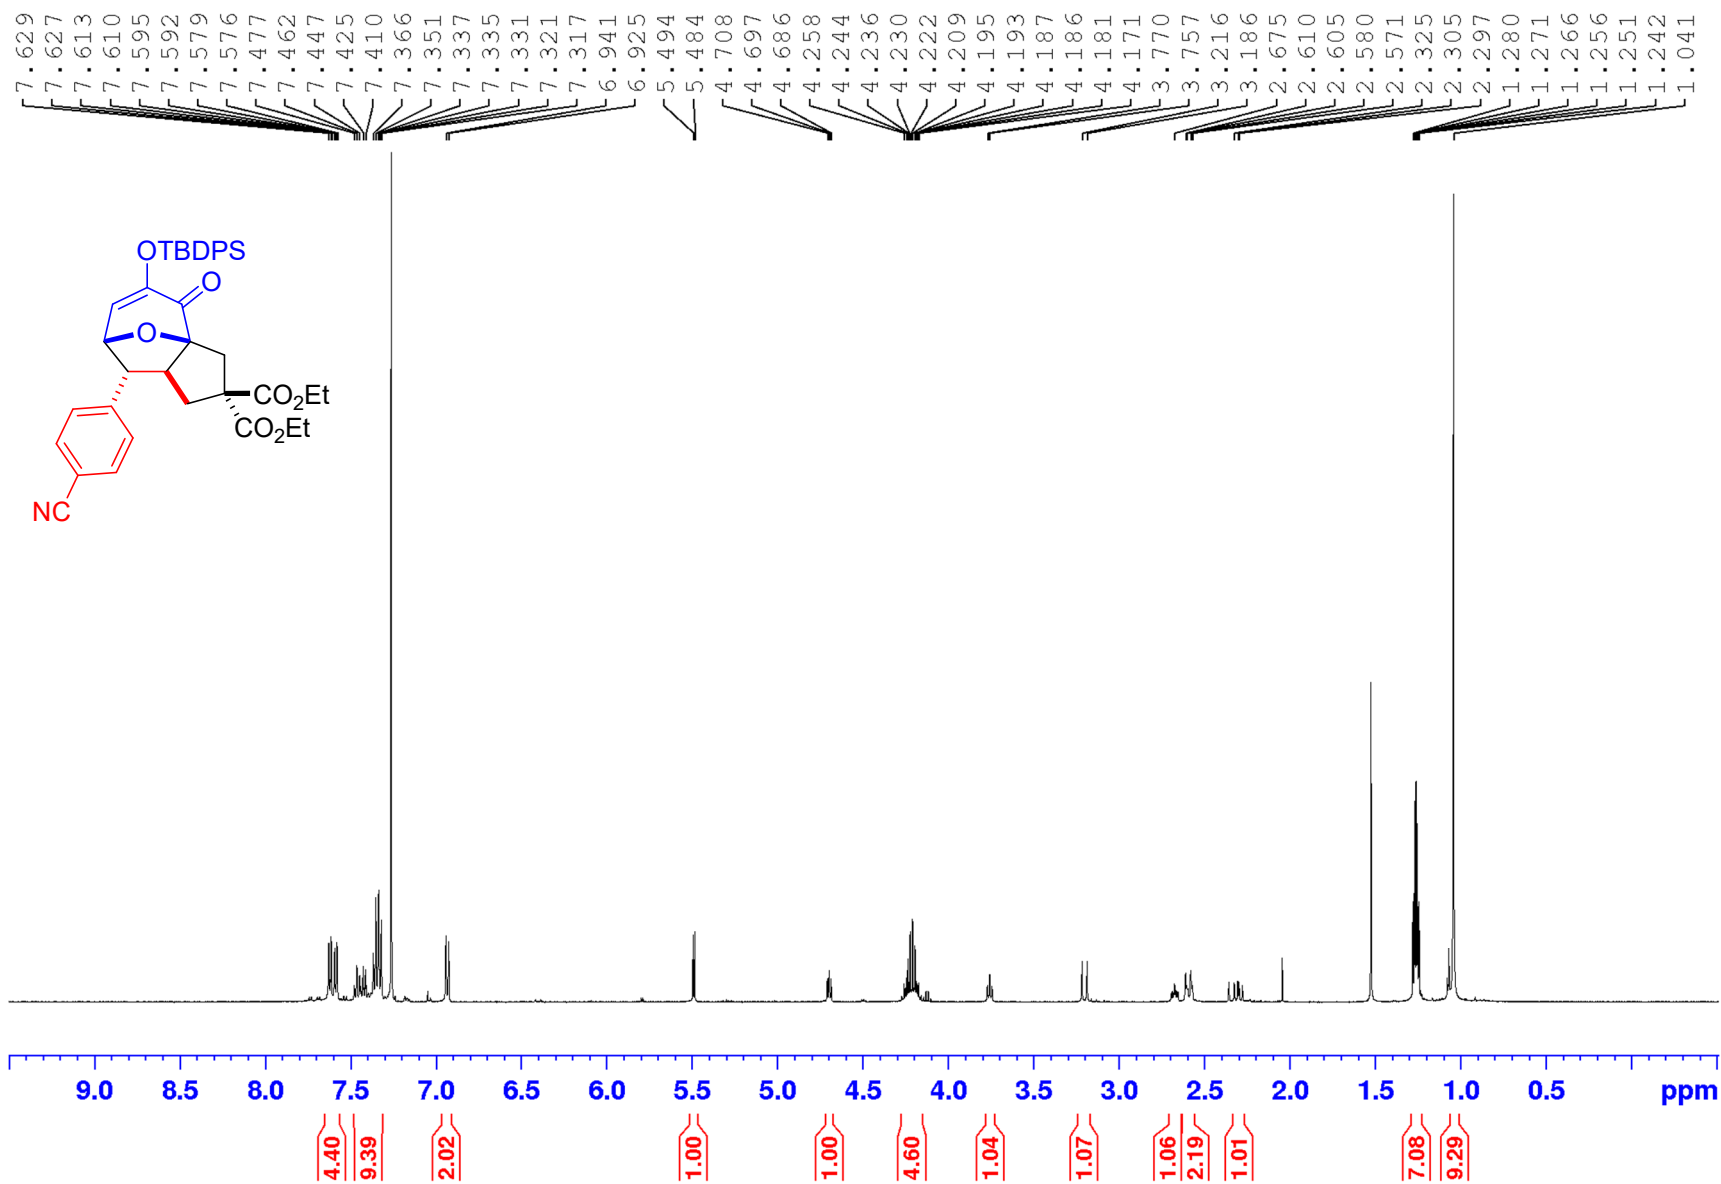

<sup>1</sup>H NMR (500 MHz) of 2y' in CDCl<sub>3</sub>

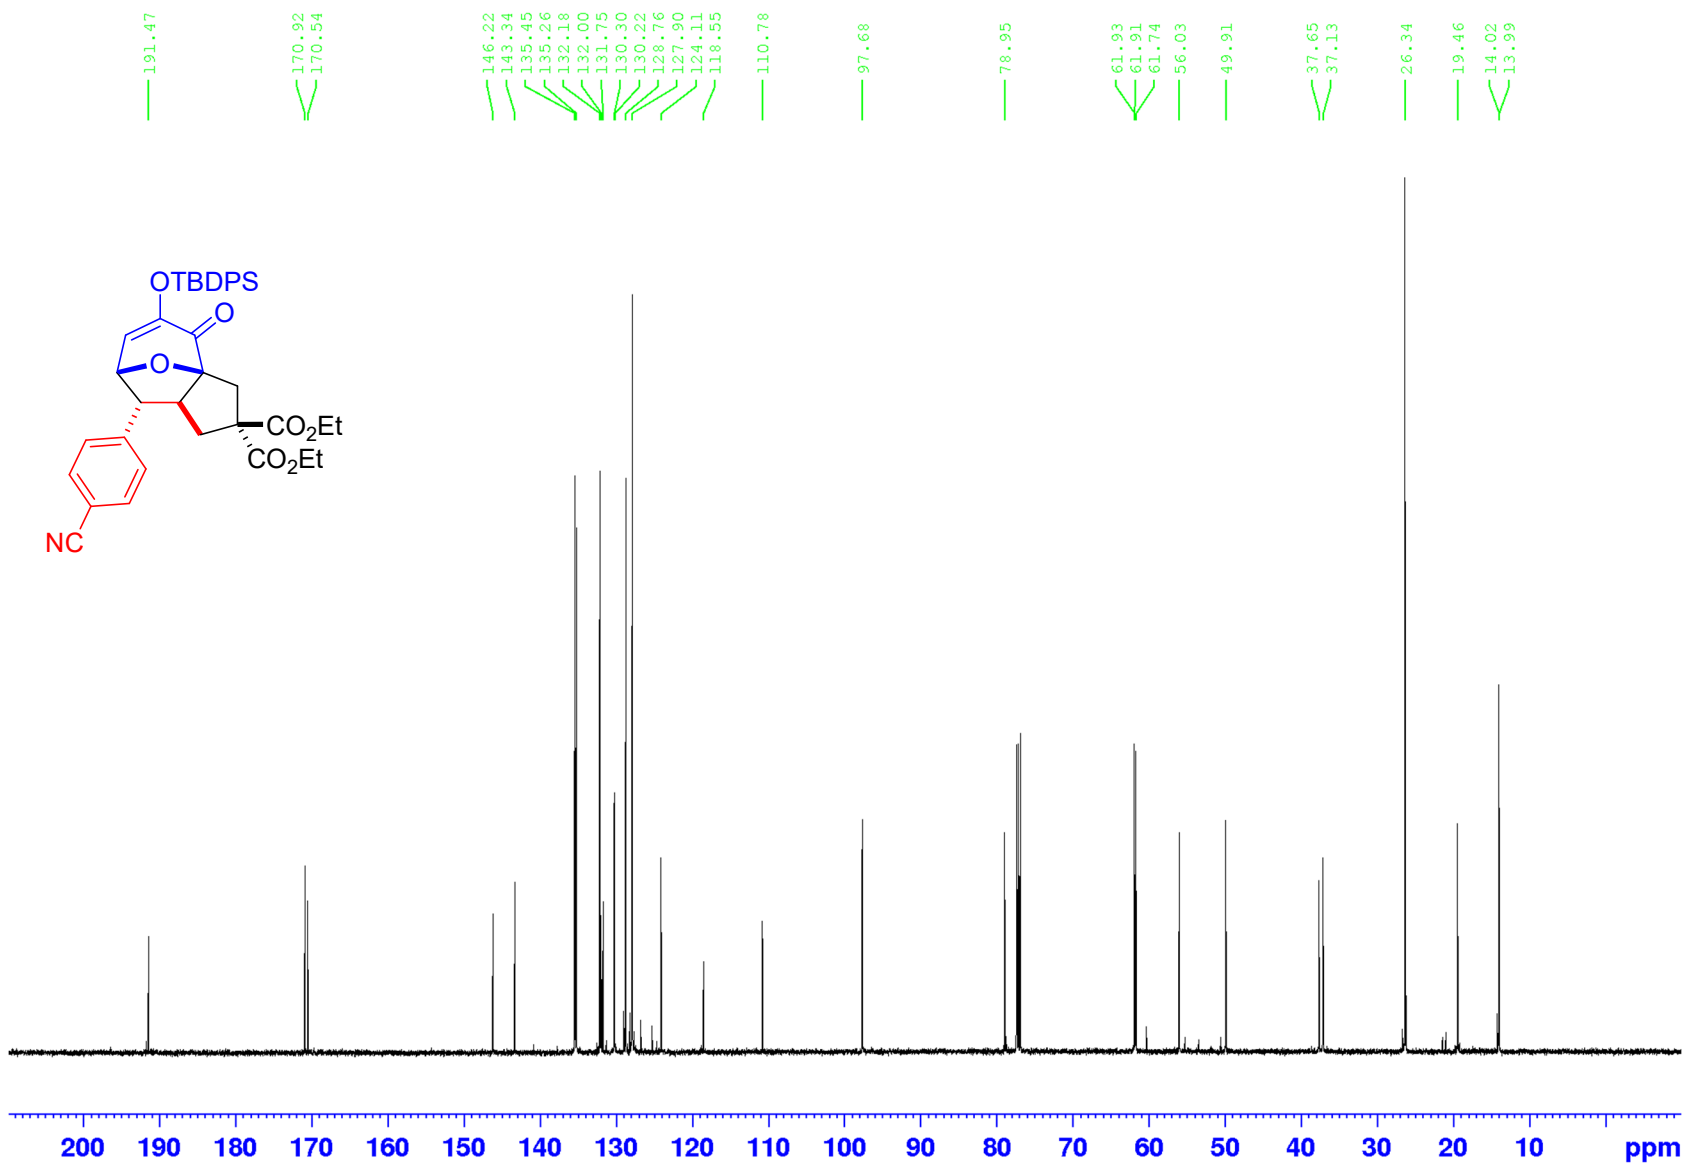

$^{13}\text{C}\{^1\text{H}\}$  NMR (125 MHz) of 2y' in  $\text{CDCl}_3$

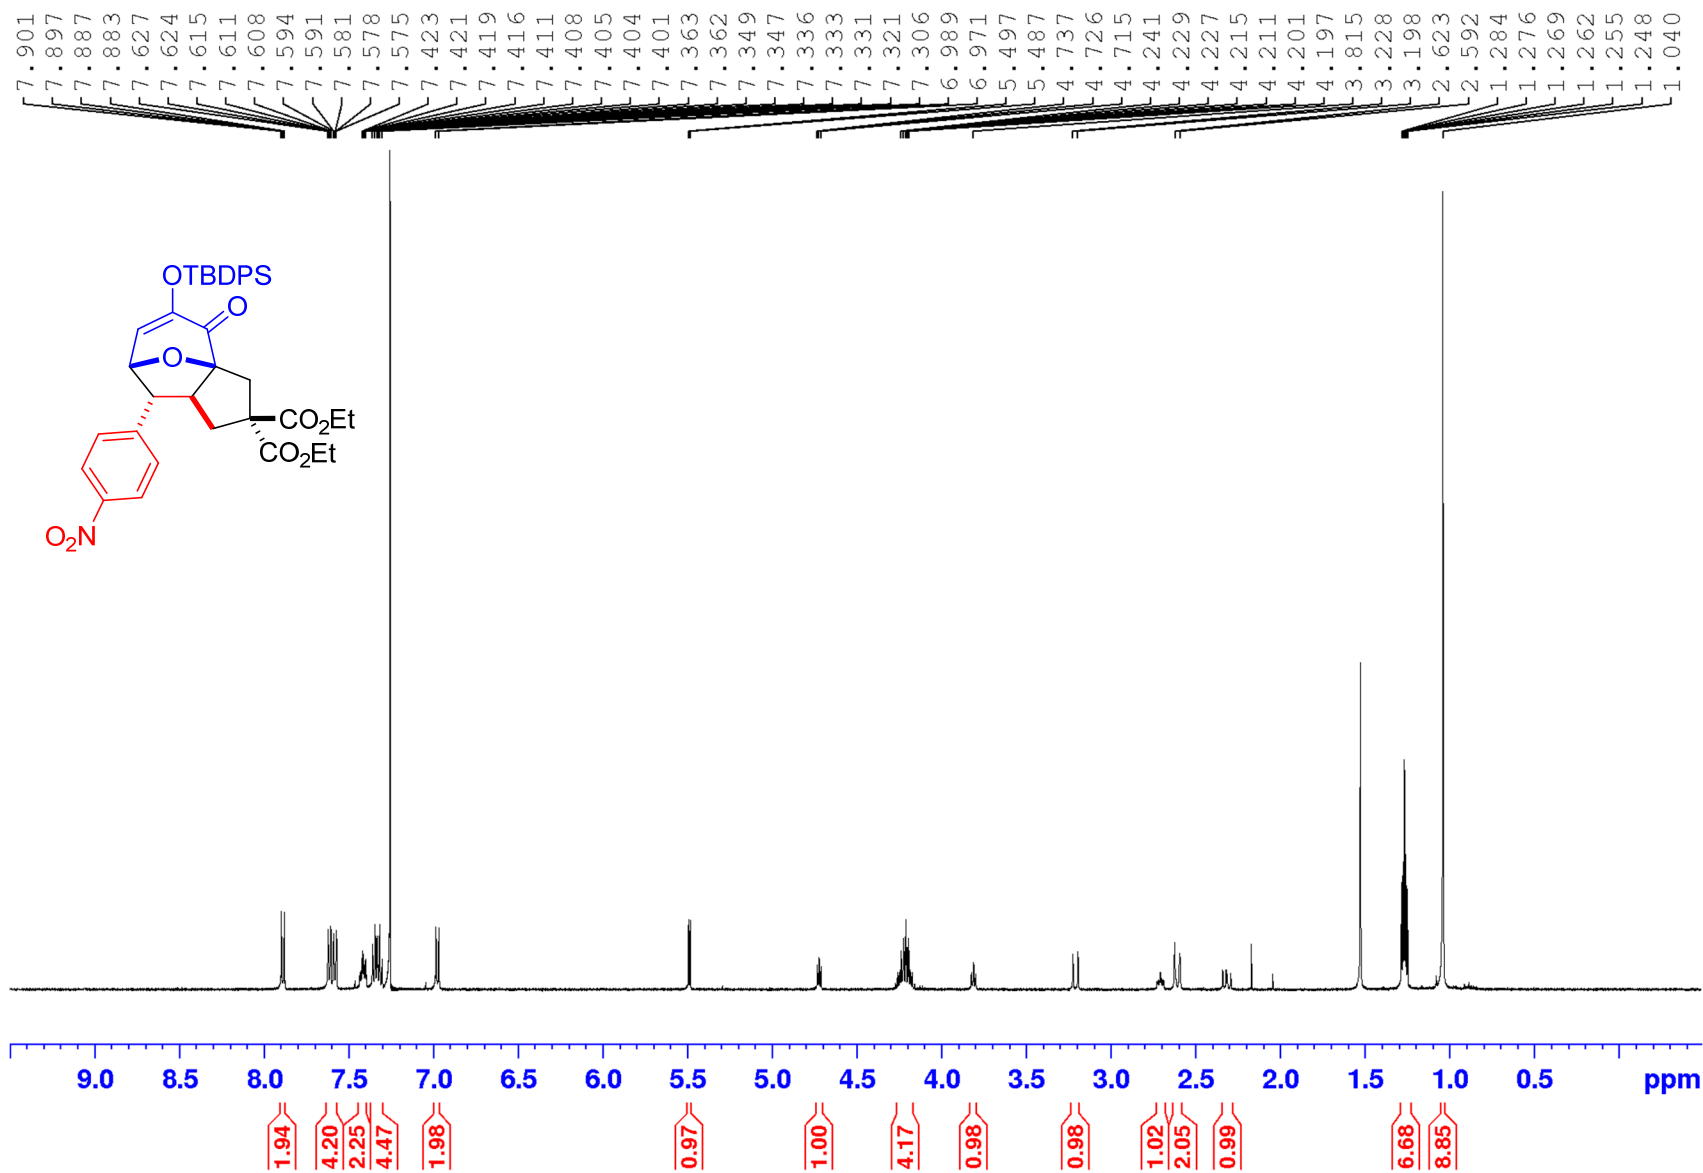

<sup>1</sup>H NMR (500 MHz) of 2z' in CDCl<sub>3</sub>

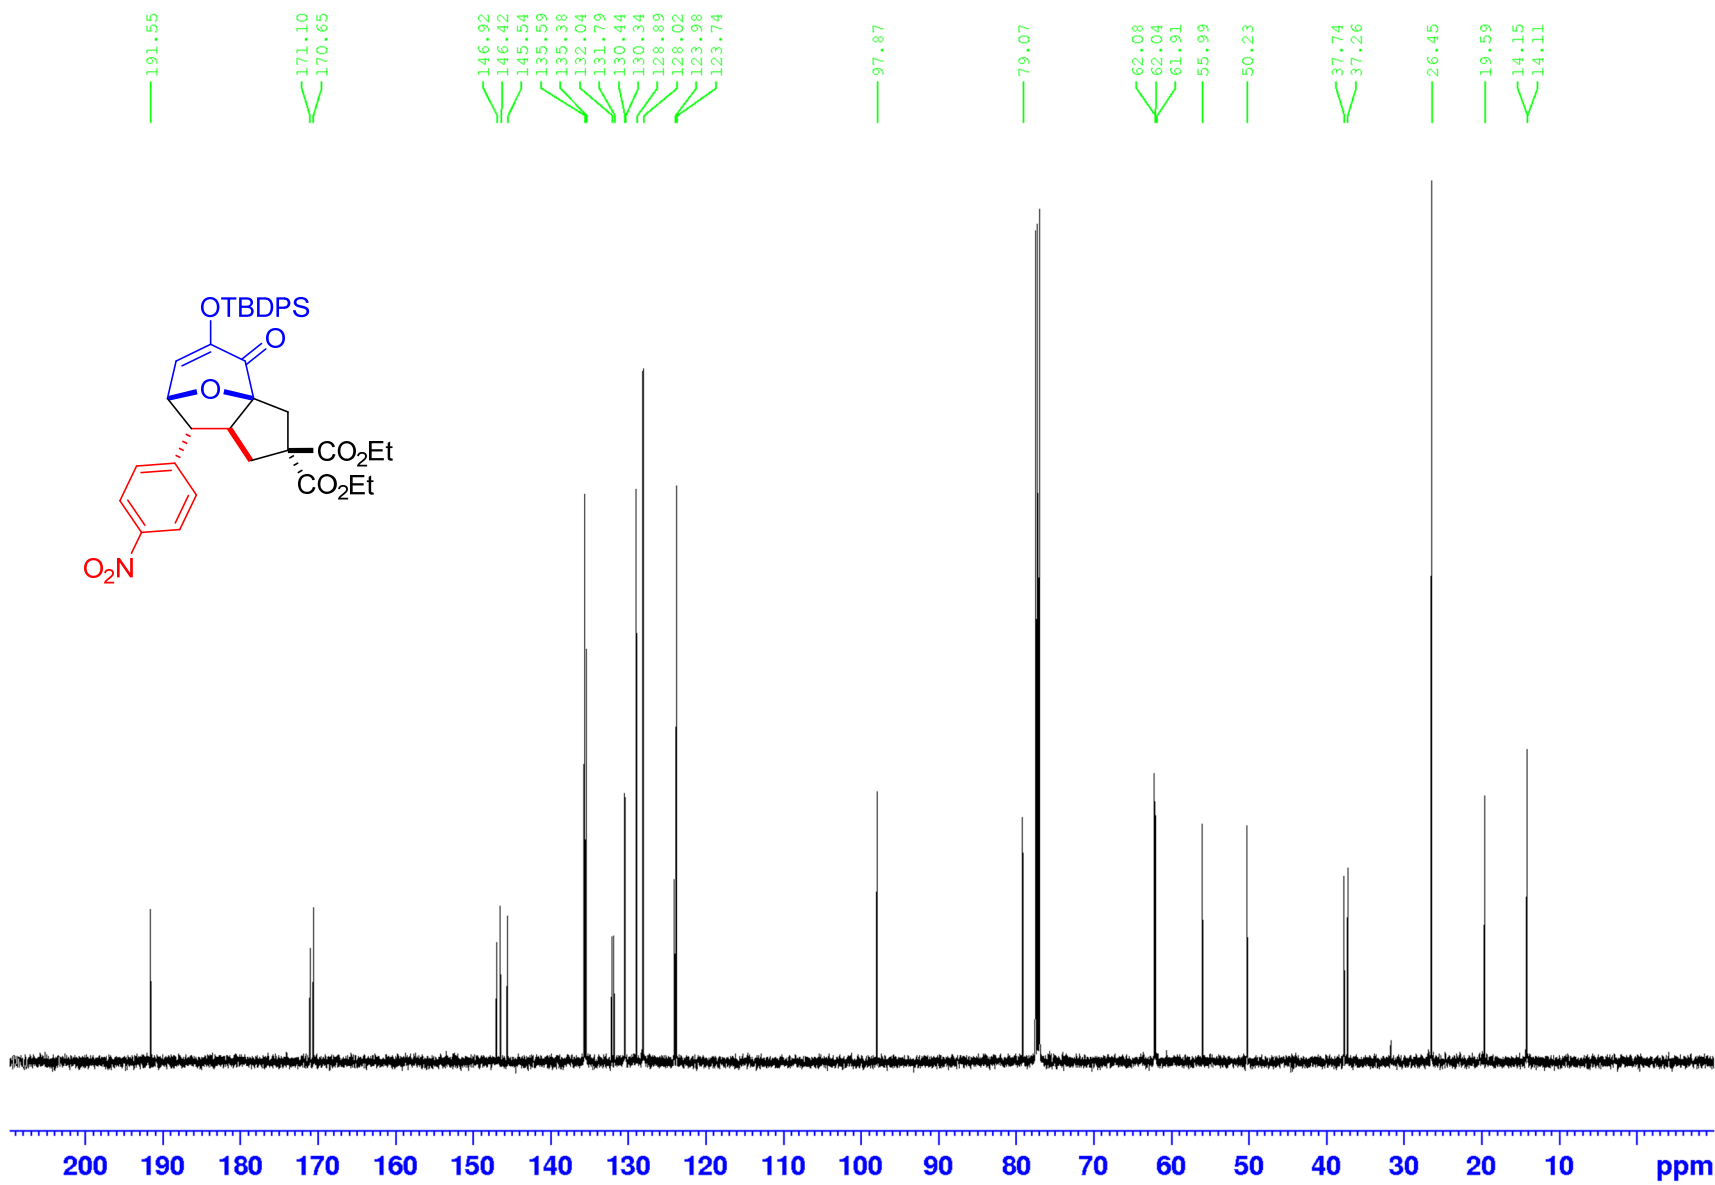

<sup>13</sup>C{<sup>1</sup>H} NMR (125 MHz) of 2z' in CDCl<sub>3</sub>

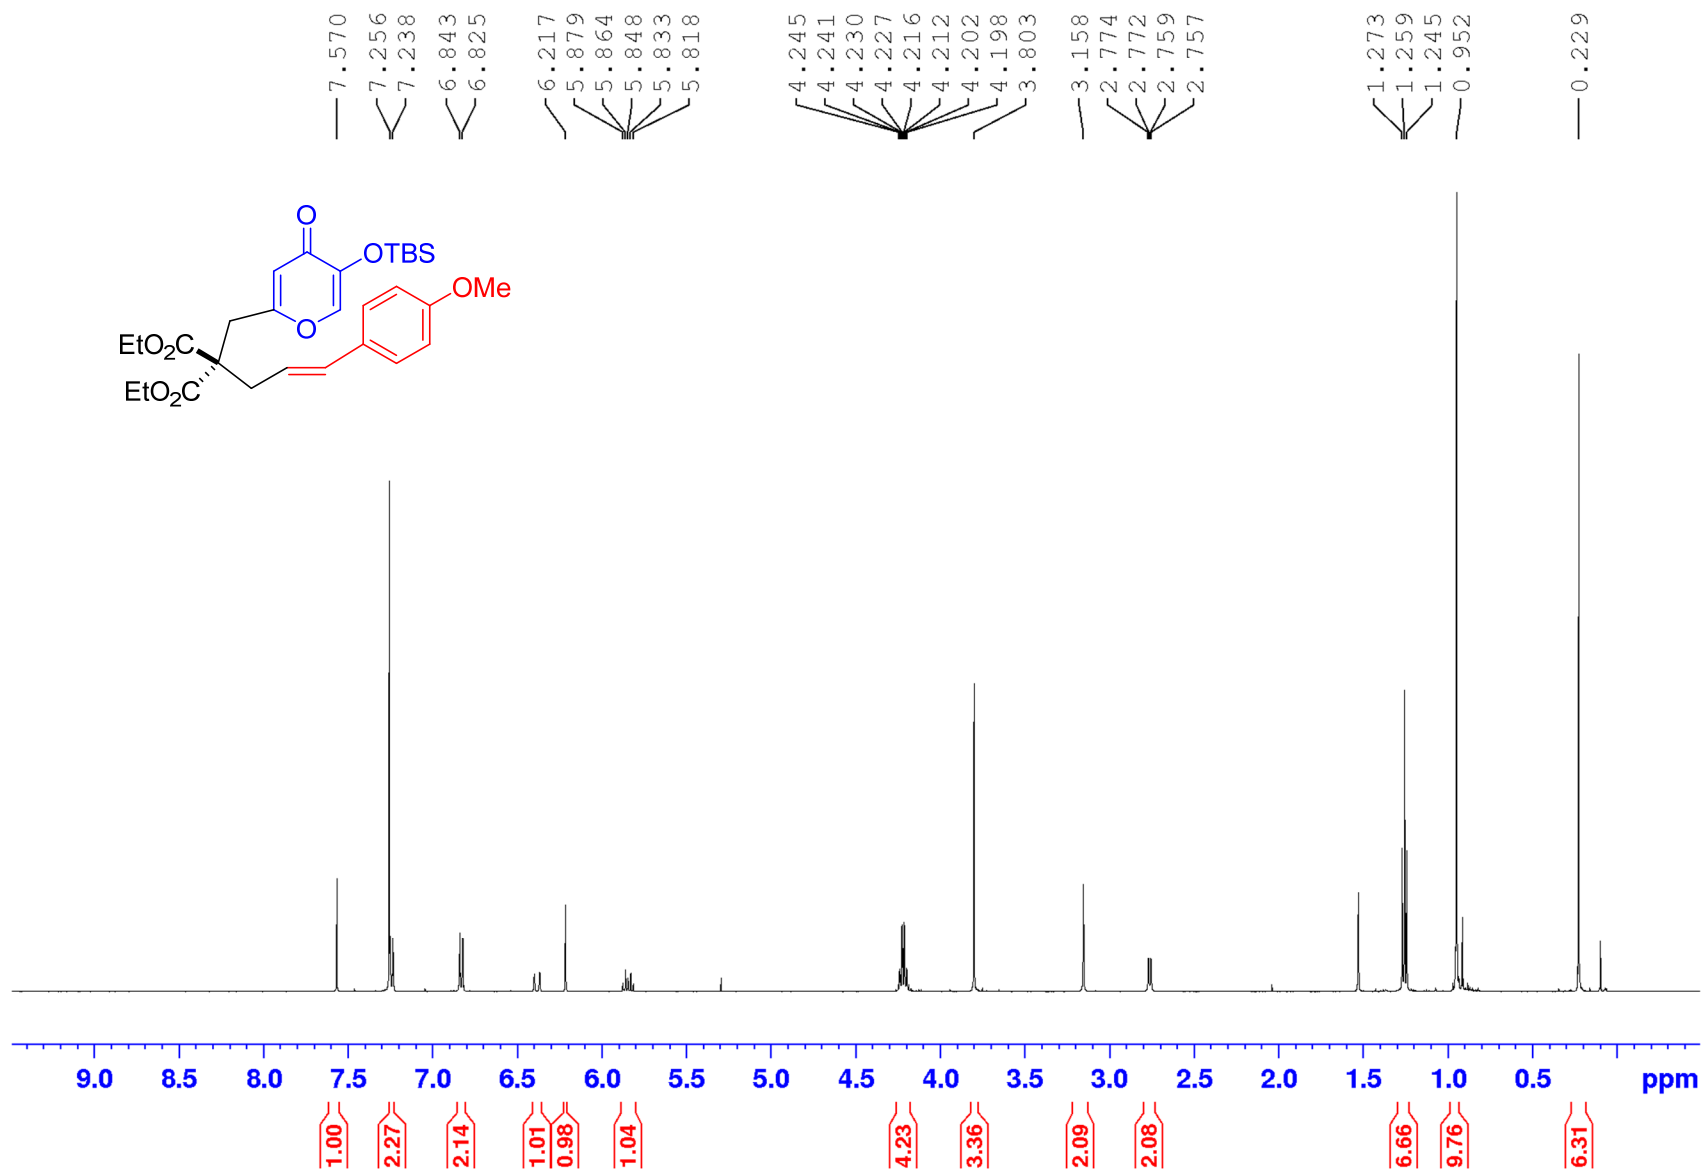

<sup>1</sup>H NMR (500 MHz) of 3e in CDCl<sub>3</sub>

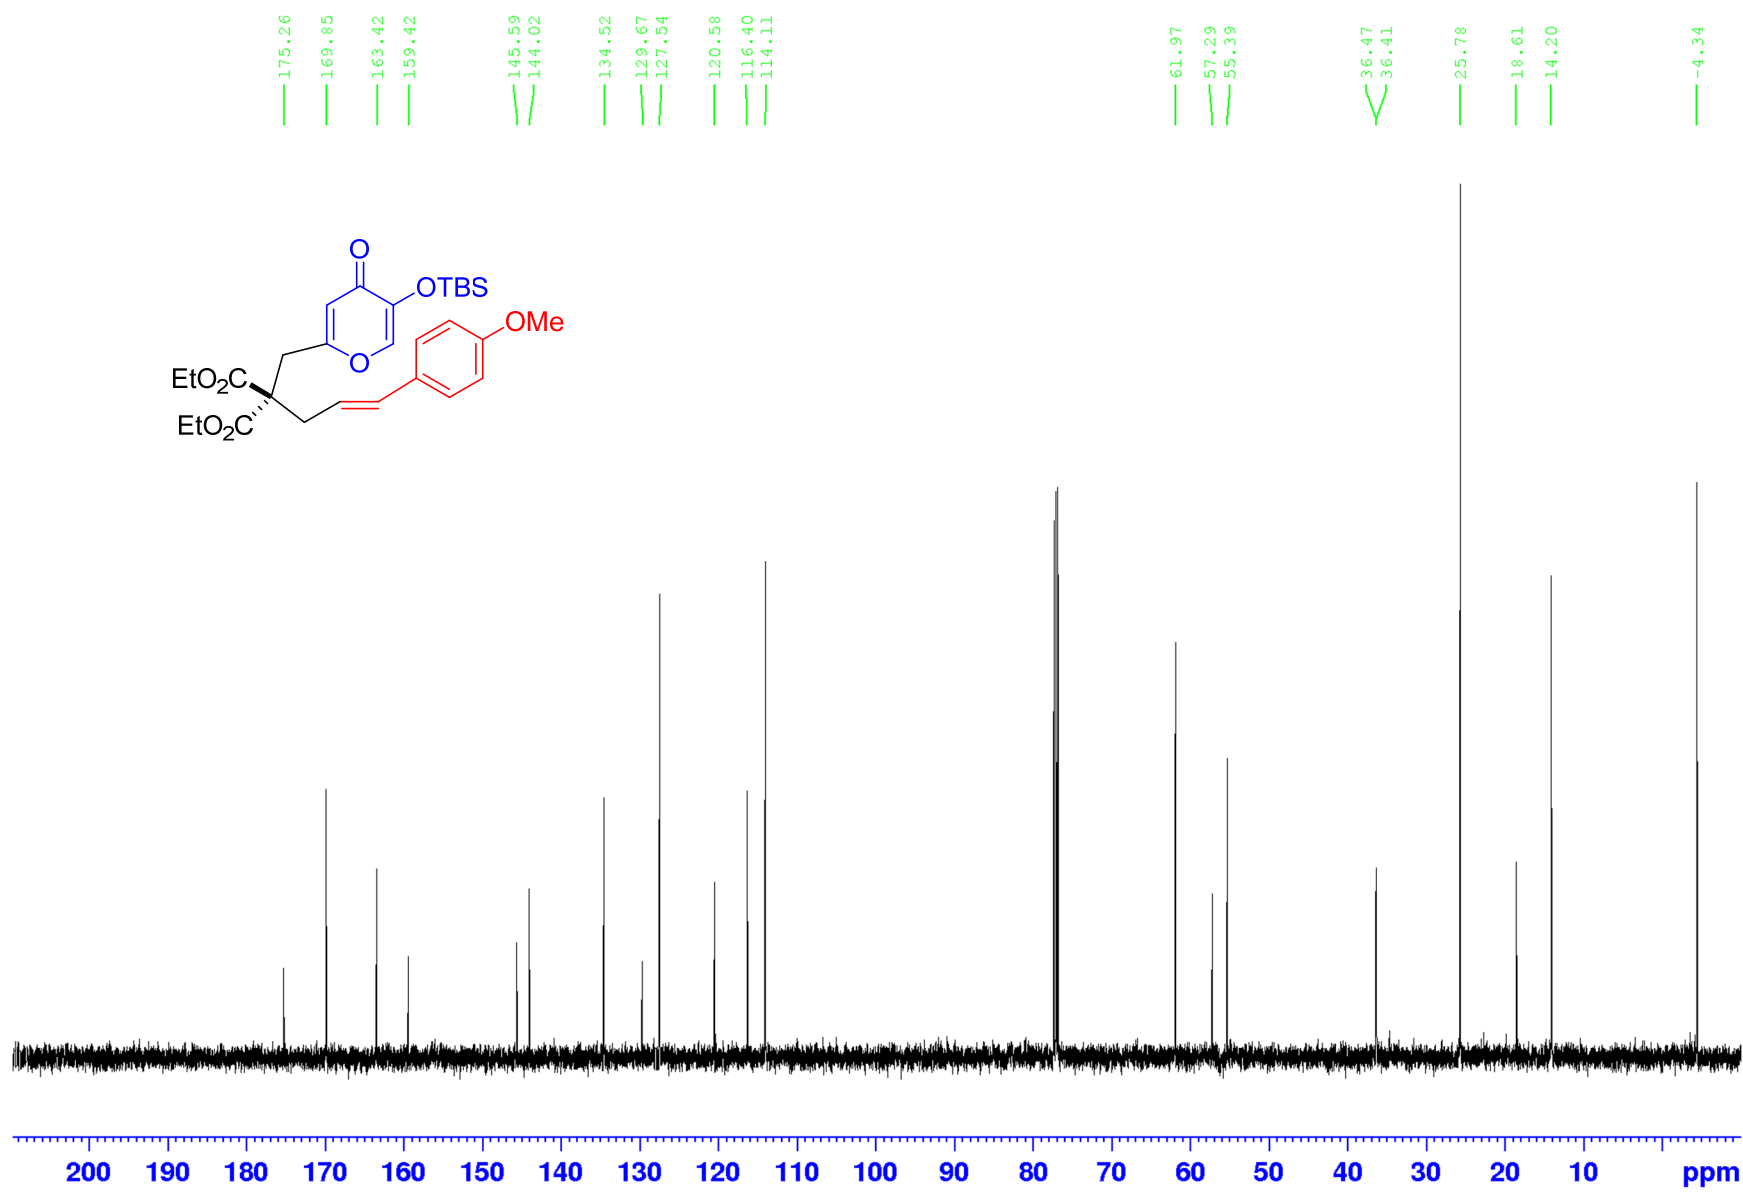

<sup>13</sup>C{<sup>1</sup>H} NMR (125 MHz) of 3e in CDCl<sub>3</sub>

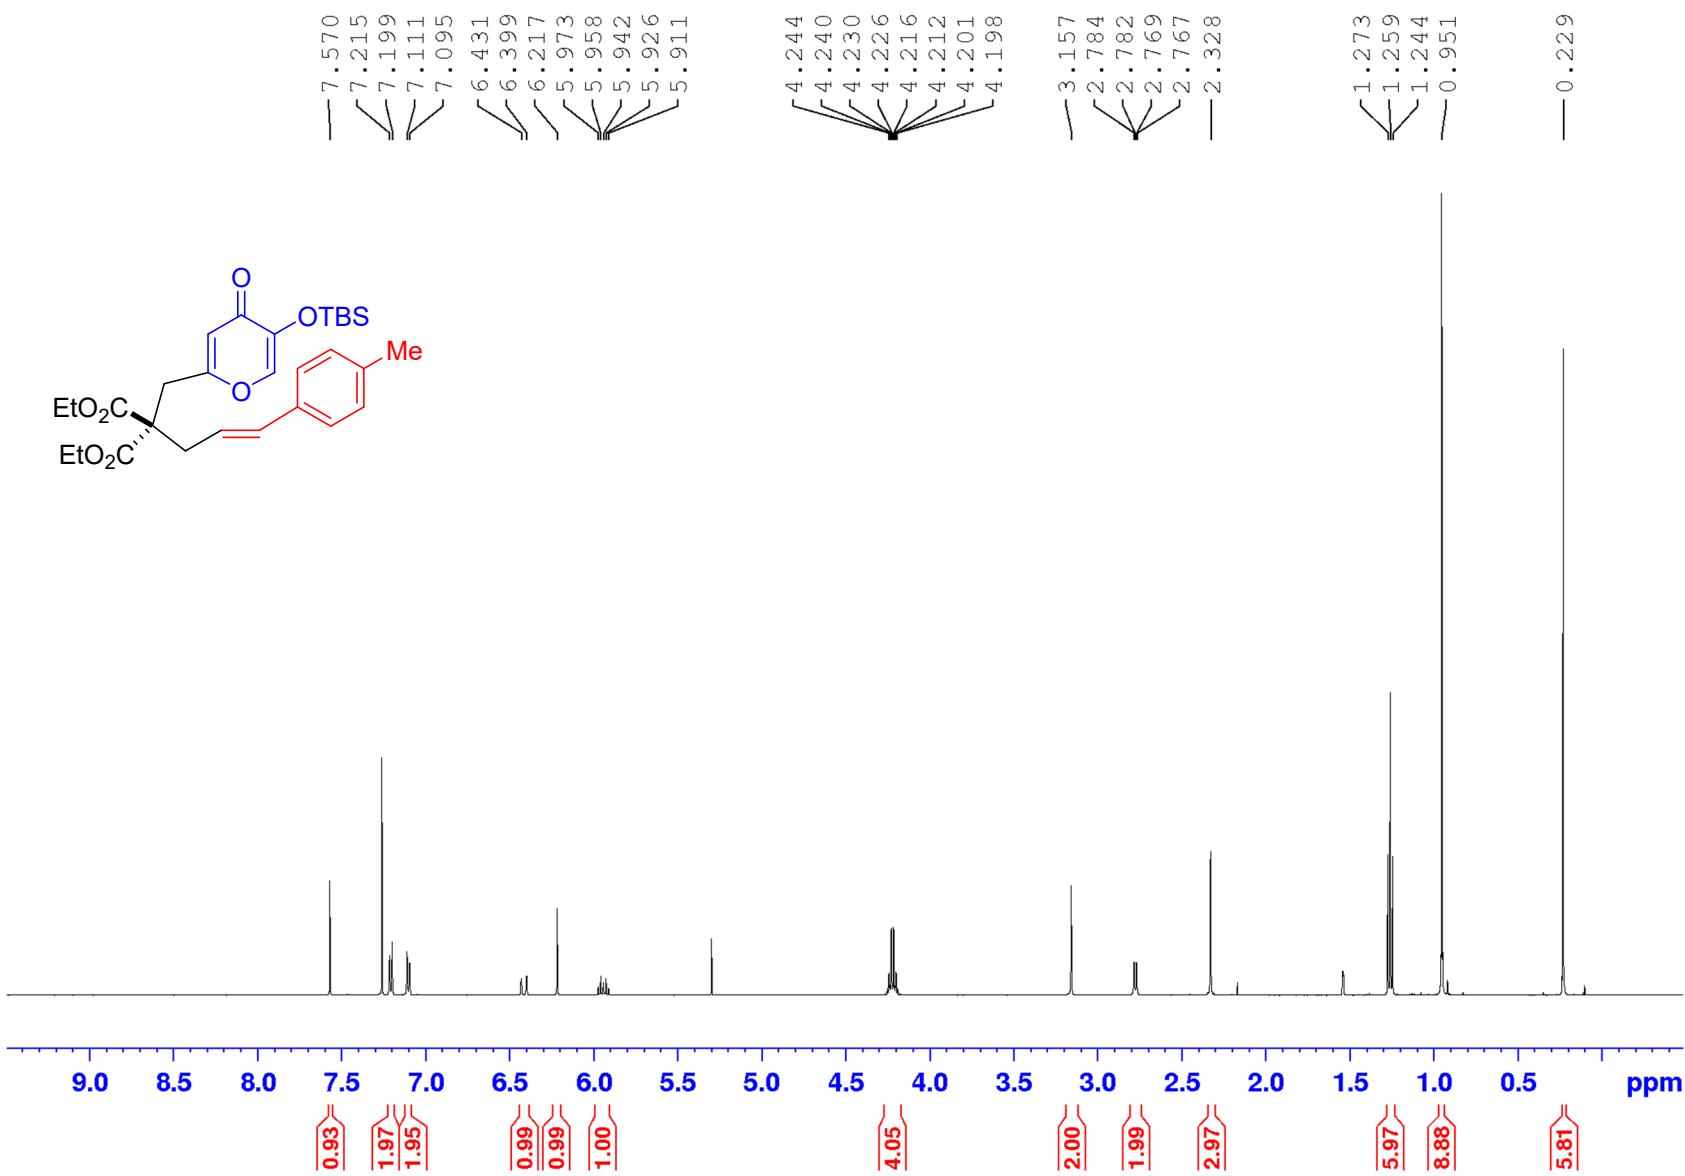

<sup>1</sup>H NMR (500 MHz) of 3f in CDCl<sub>3</sub>

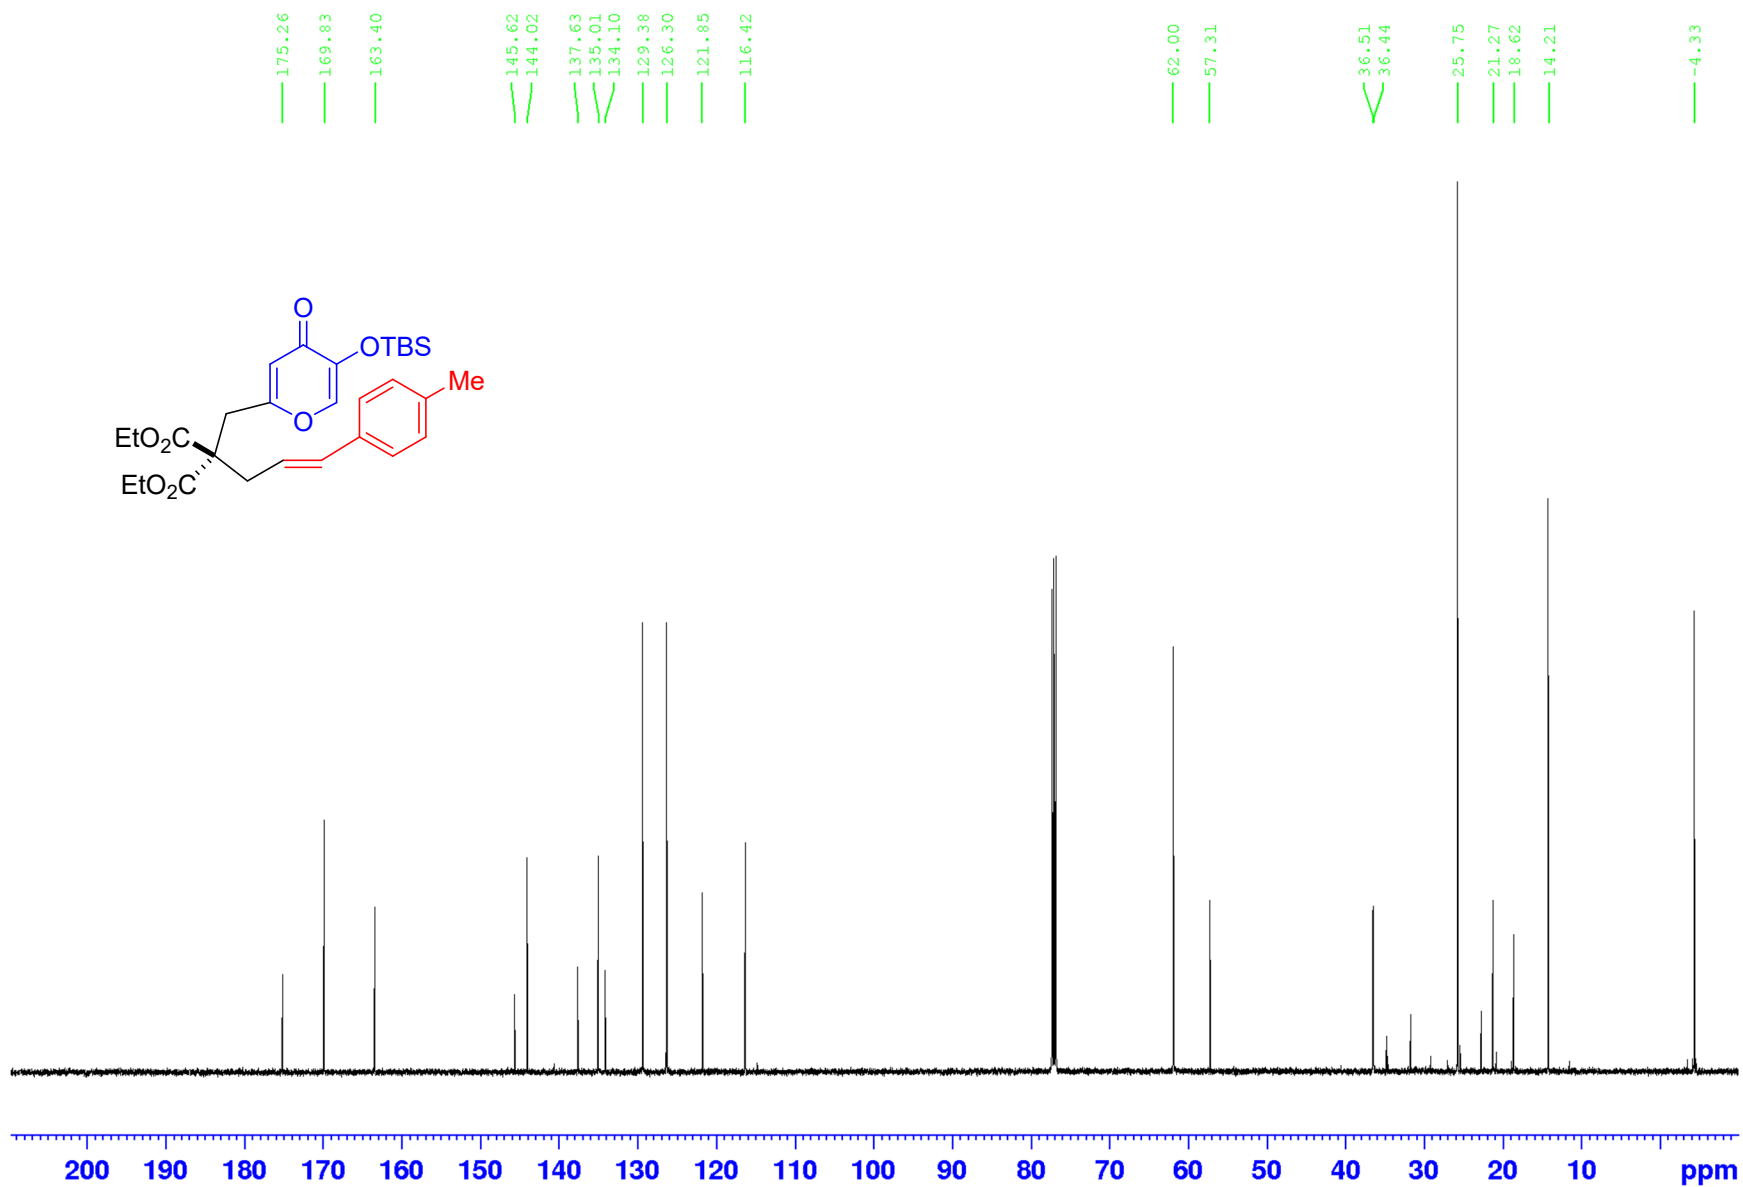

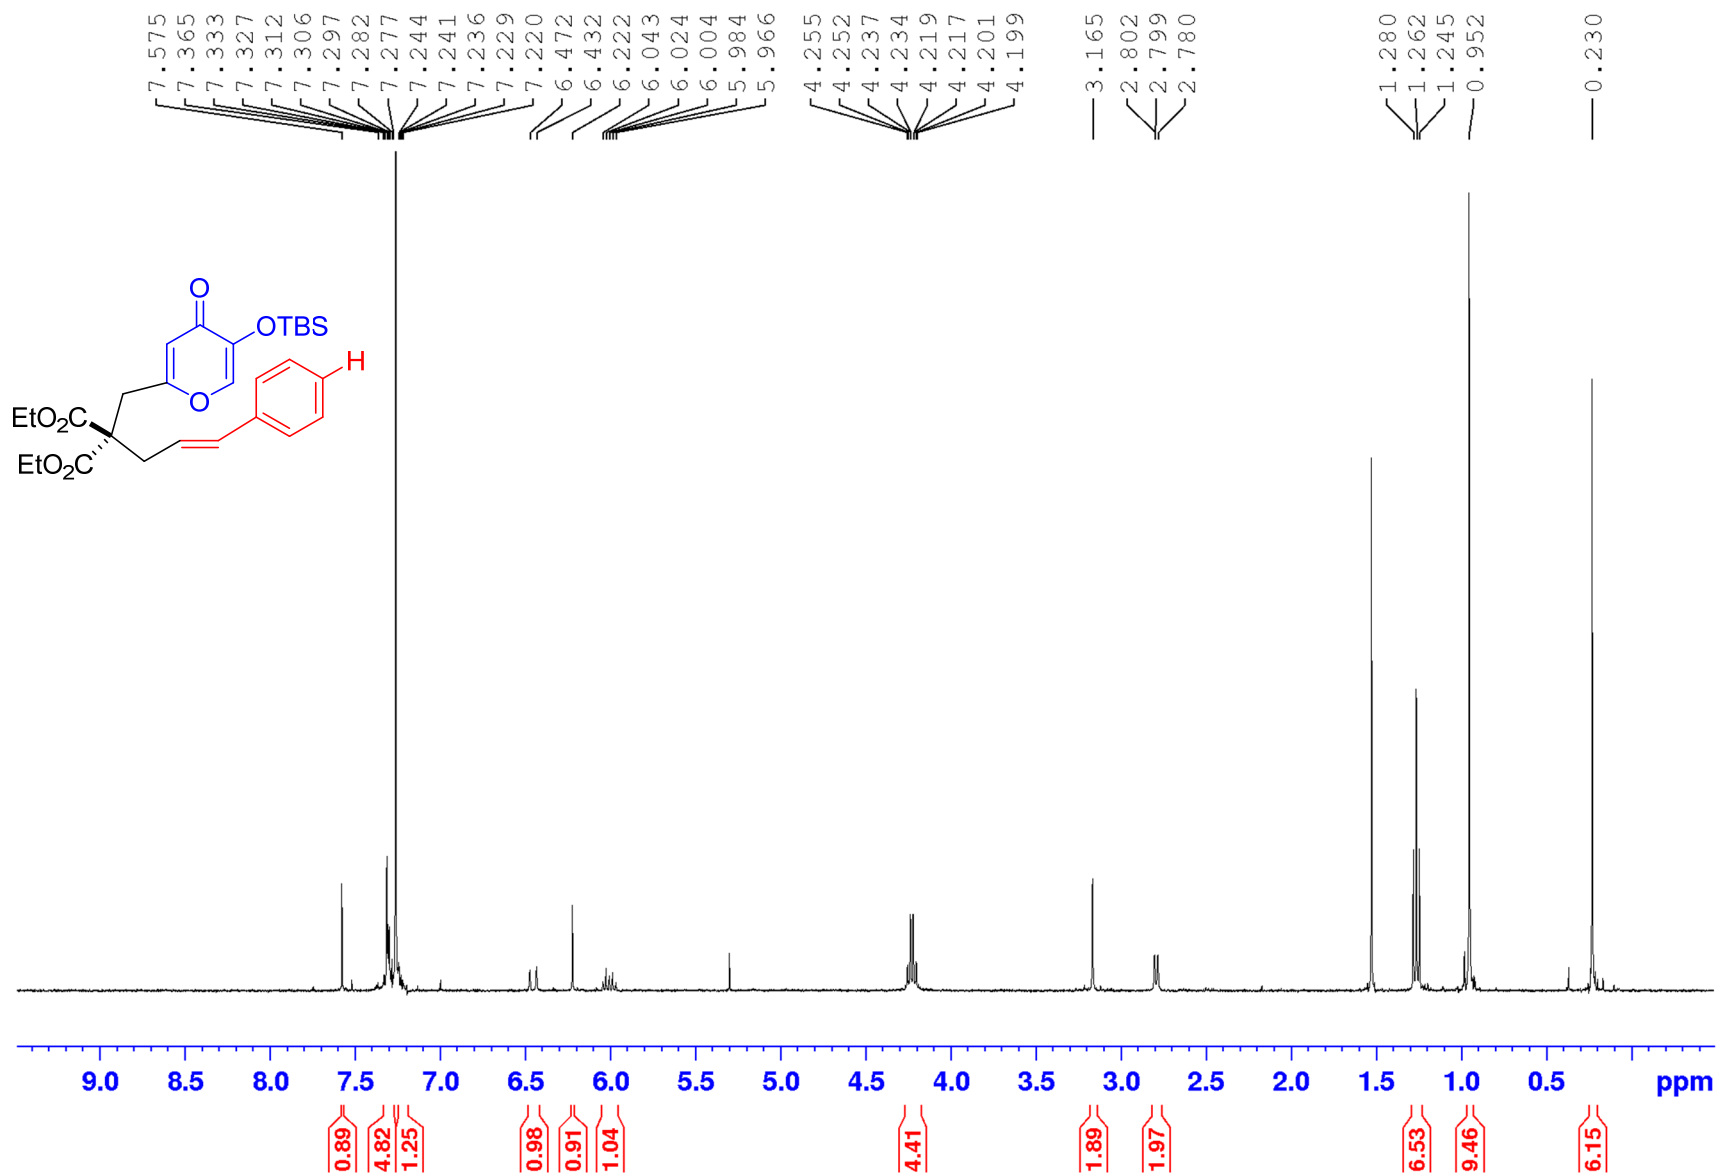

<sup>1</sup>H NMR (400 MHz) of 3g in CDCl<sub>3</sub>

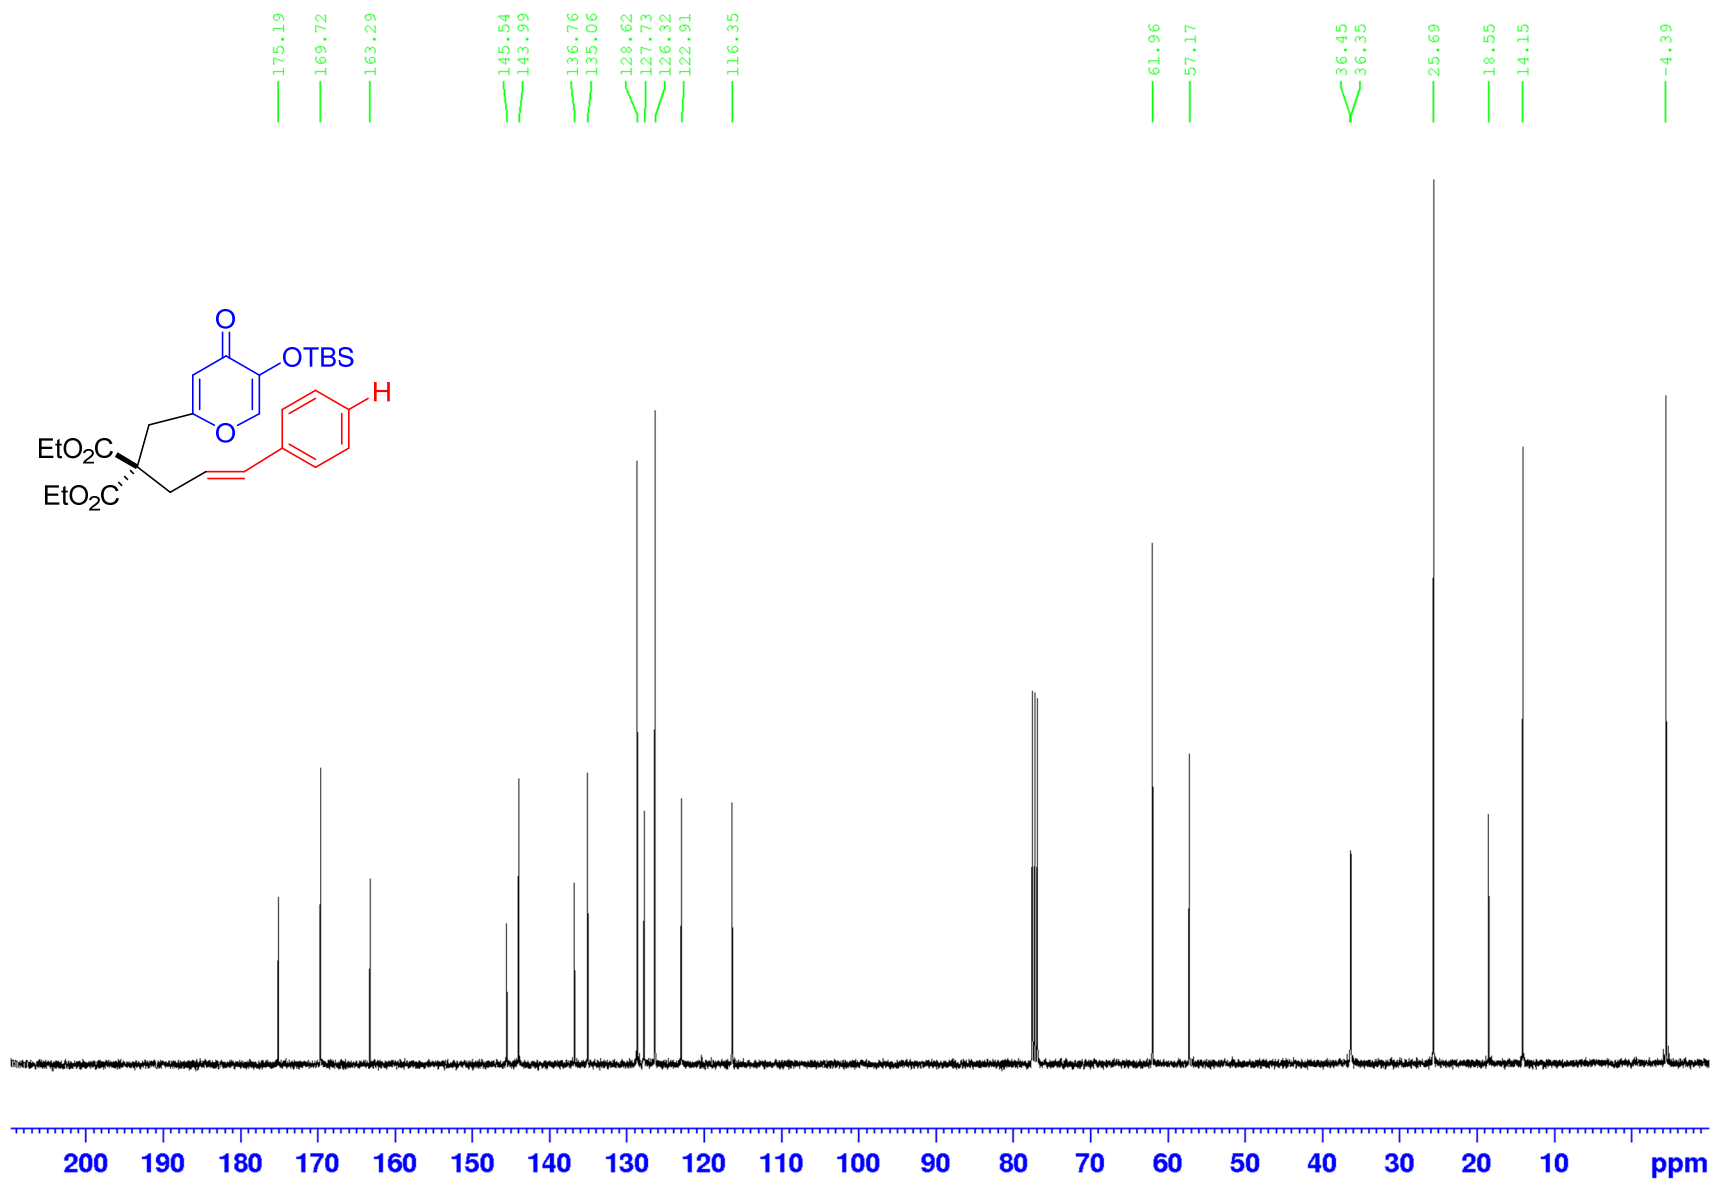

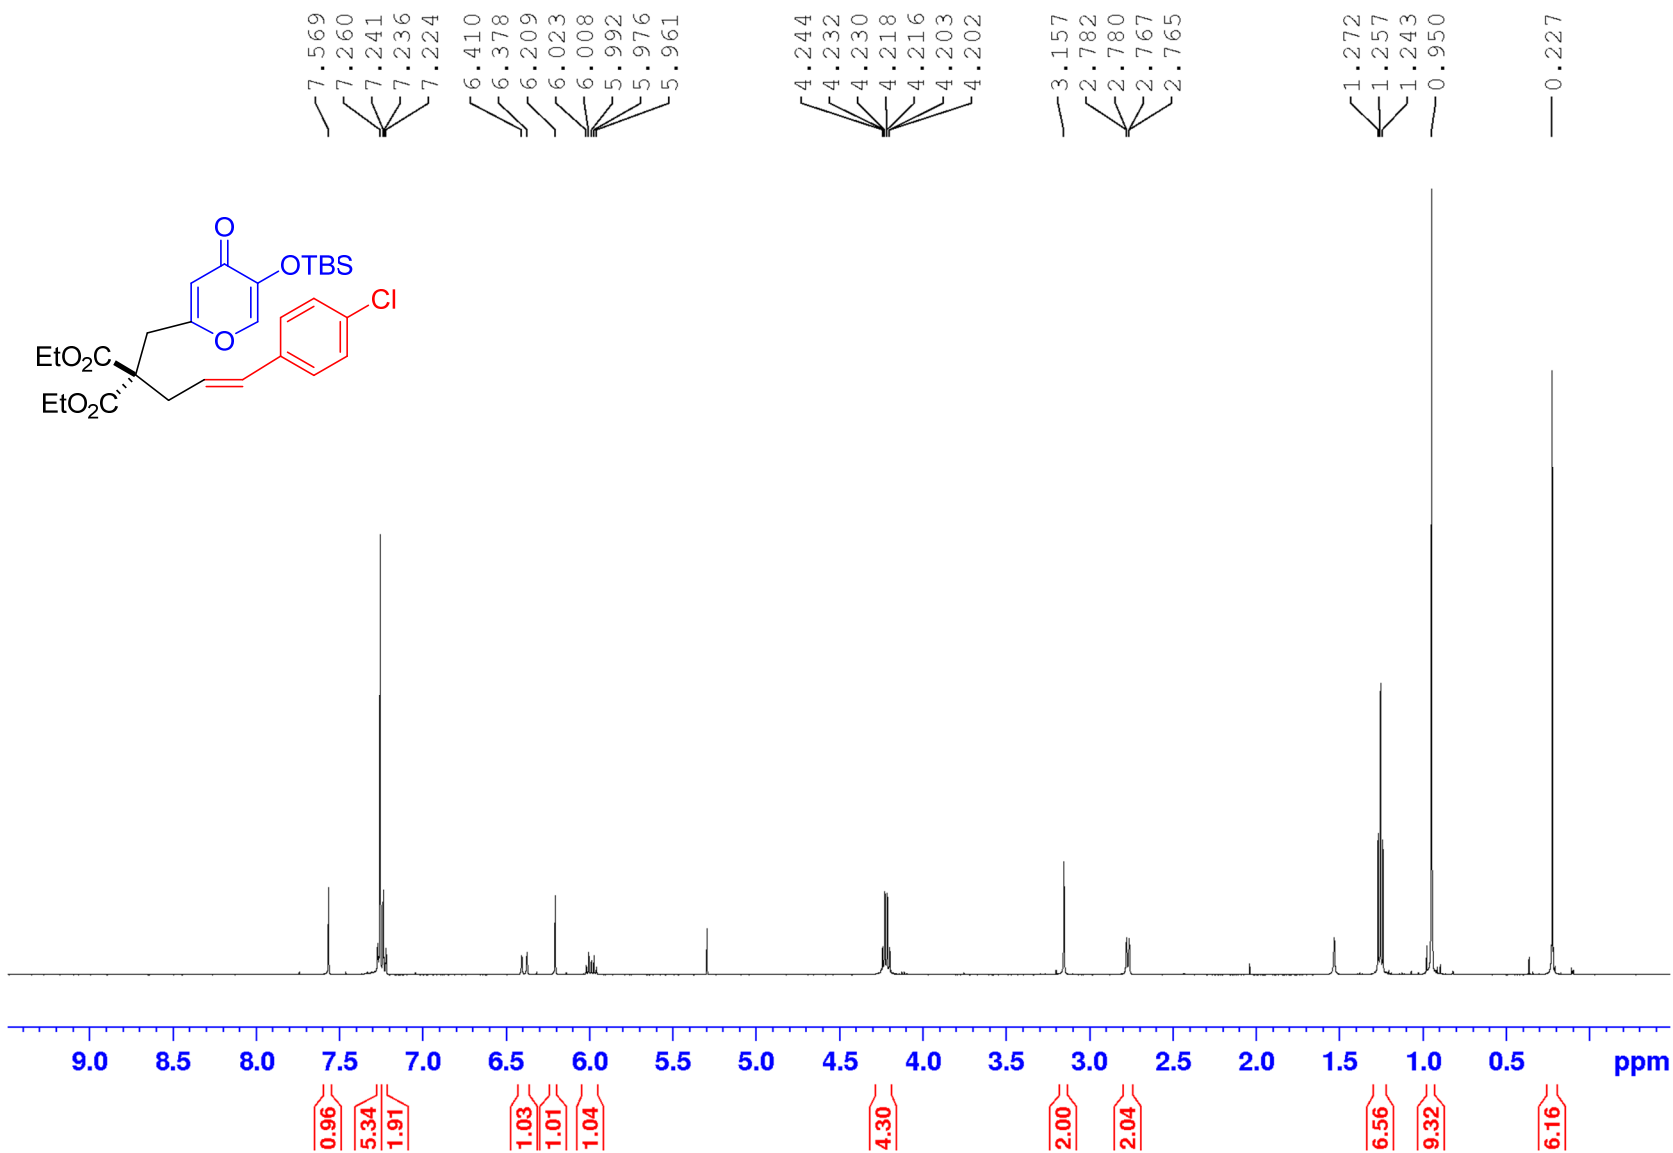

<sup>1</sup>H NMR (500 MHz) of 3h in CDCl<sub>3</sub>

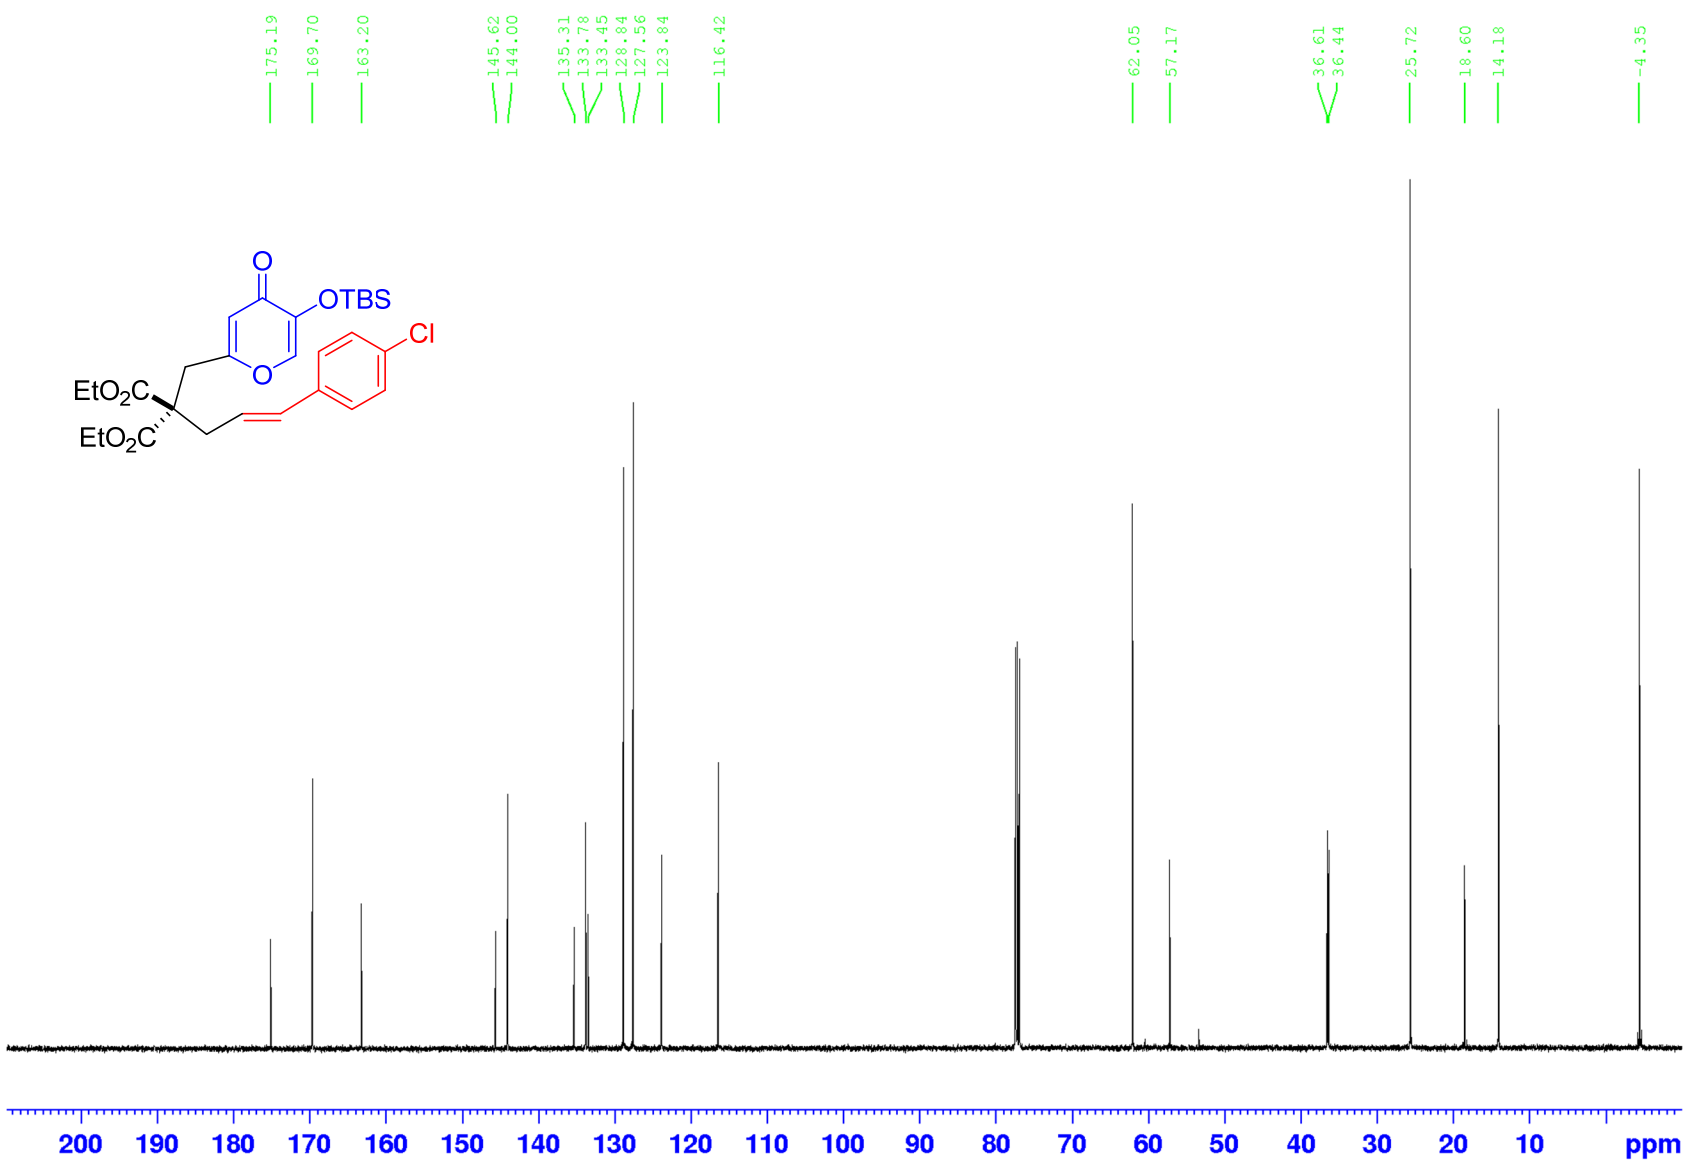

<sup>13</sup>C{<sup>1</sup>H} NMR (125 MHz) of 3h in CDCl<sub>3</sub>

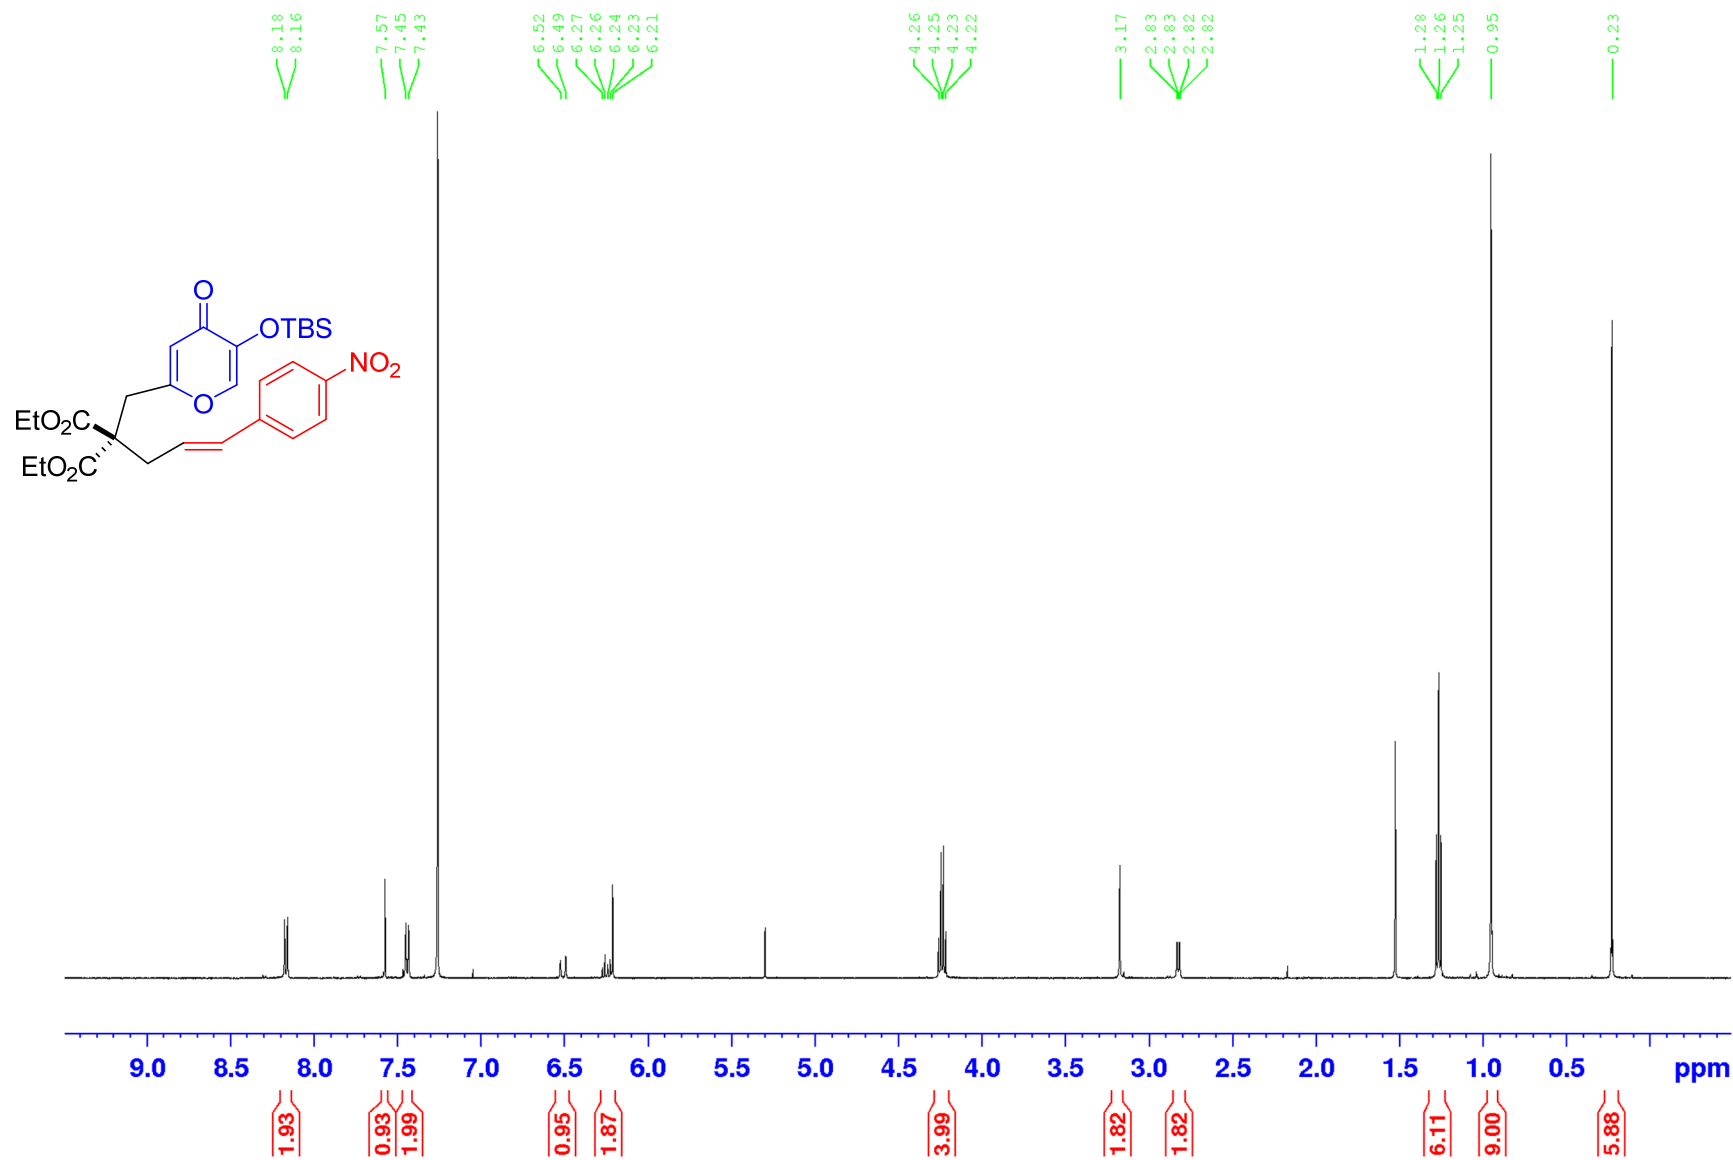

<sup>1</sup>H NMR (500 MHz) of 3i in CDCl<sub>3</sub>

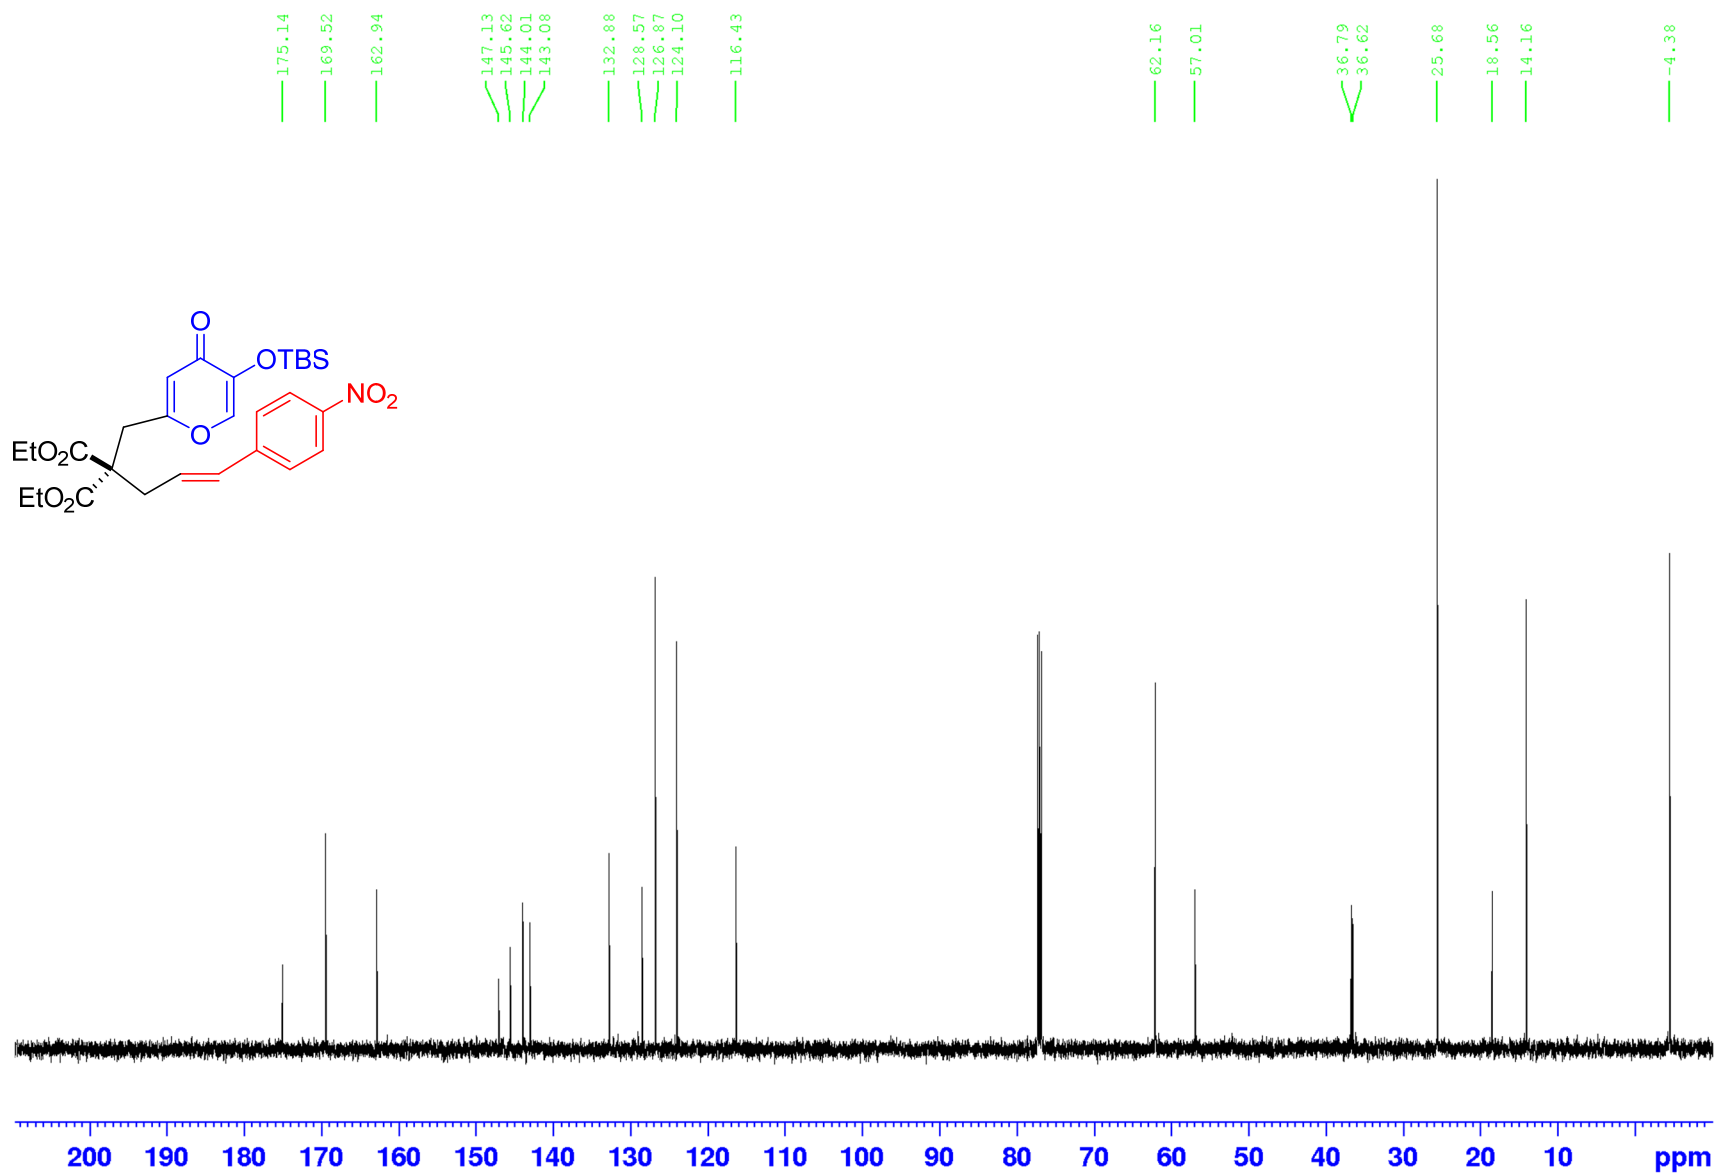

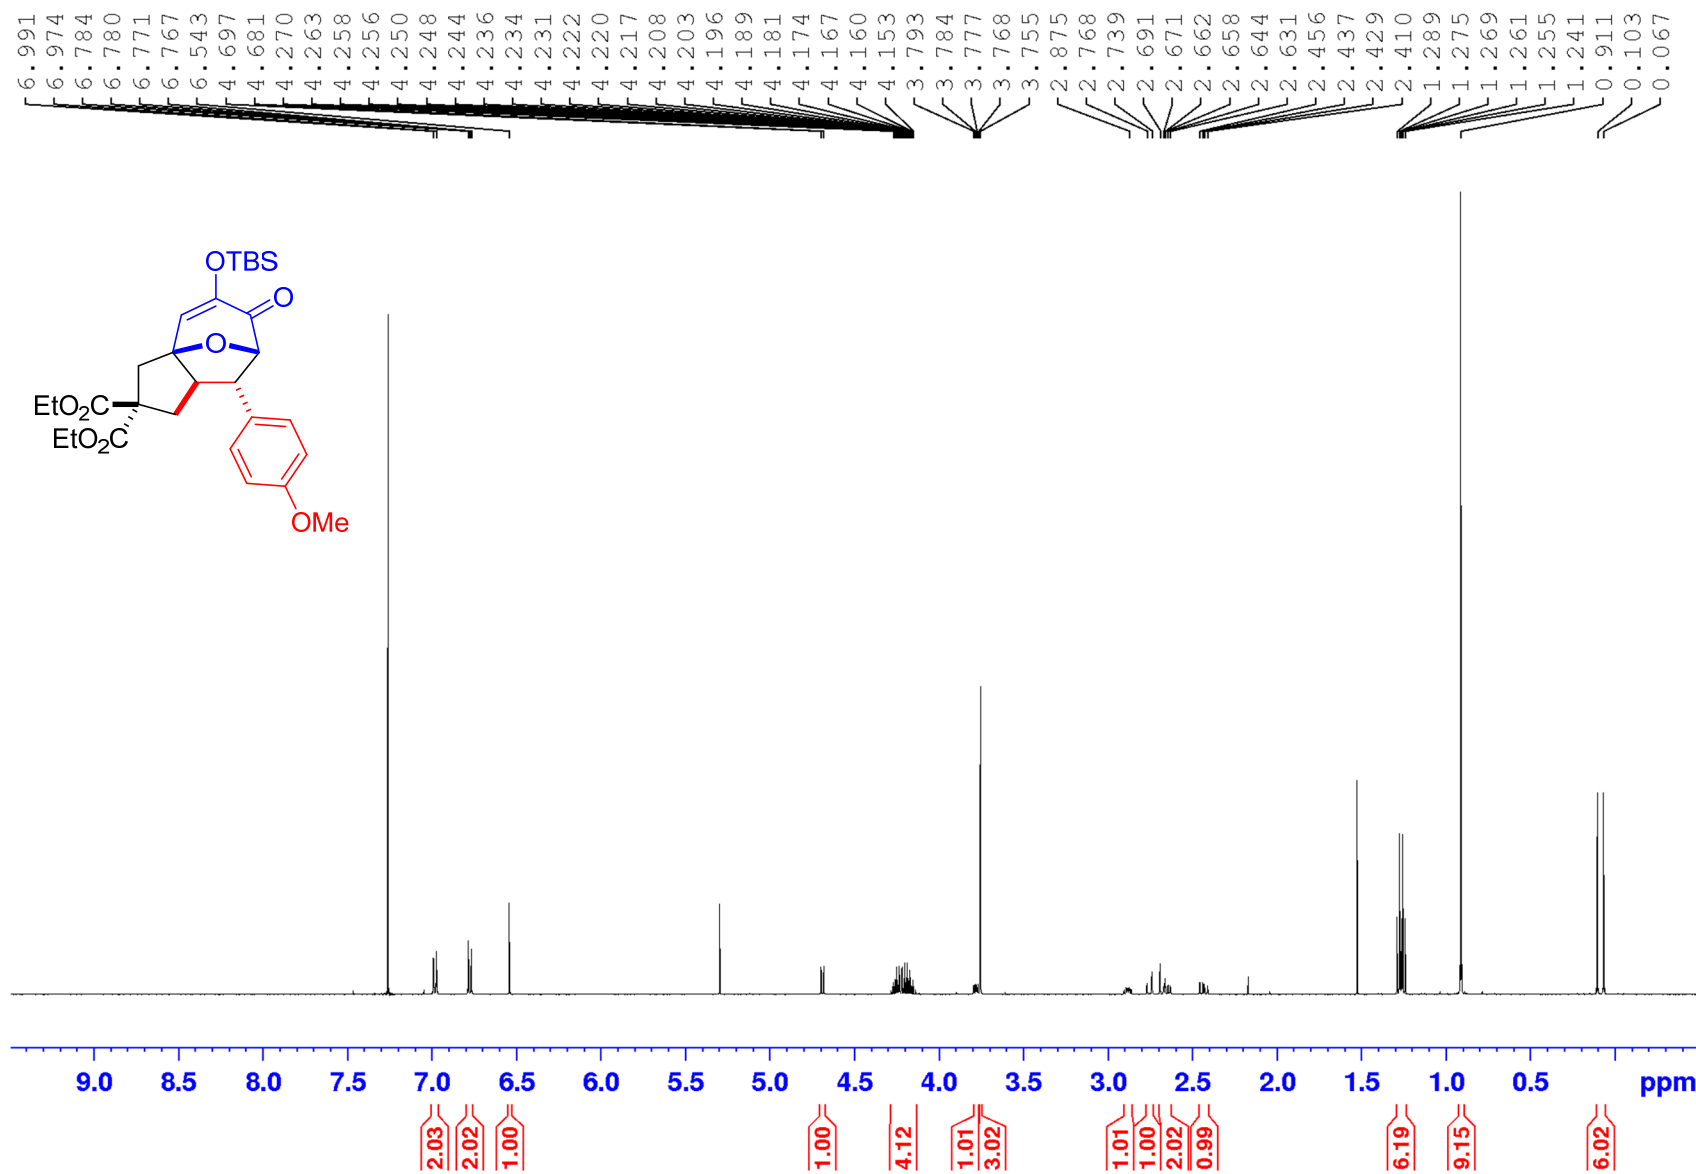

<sup>1</sup>H NMR (500 MHz) of 4e in CDCl<sub>3</sub>



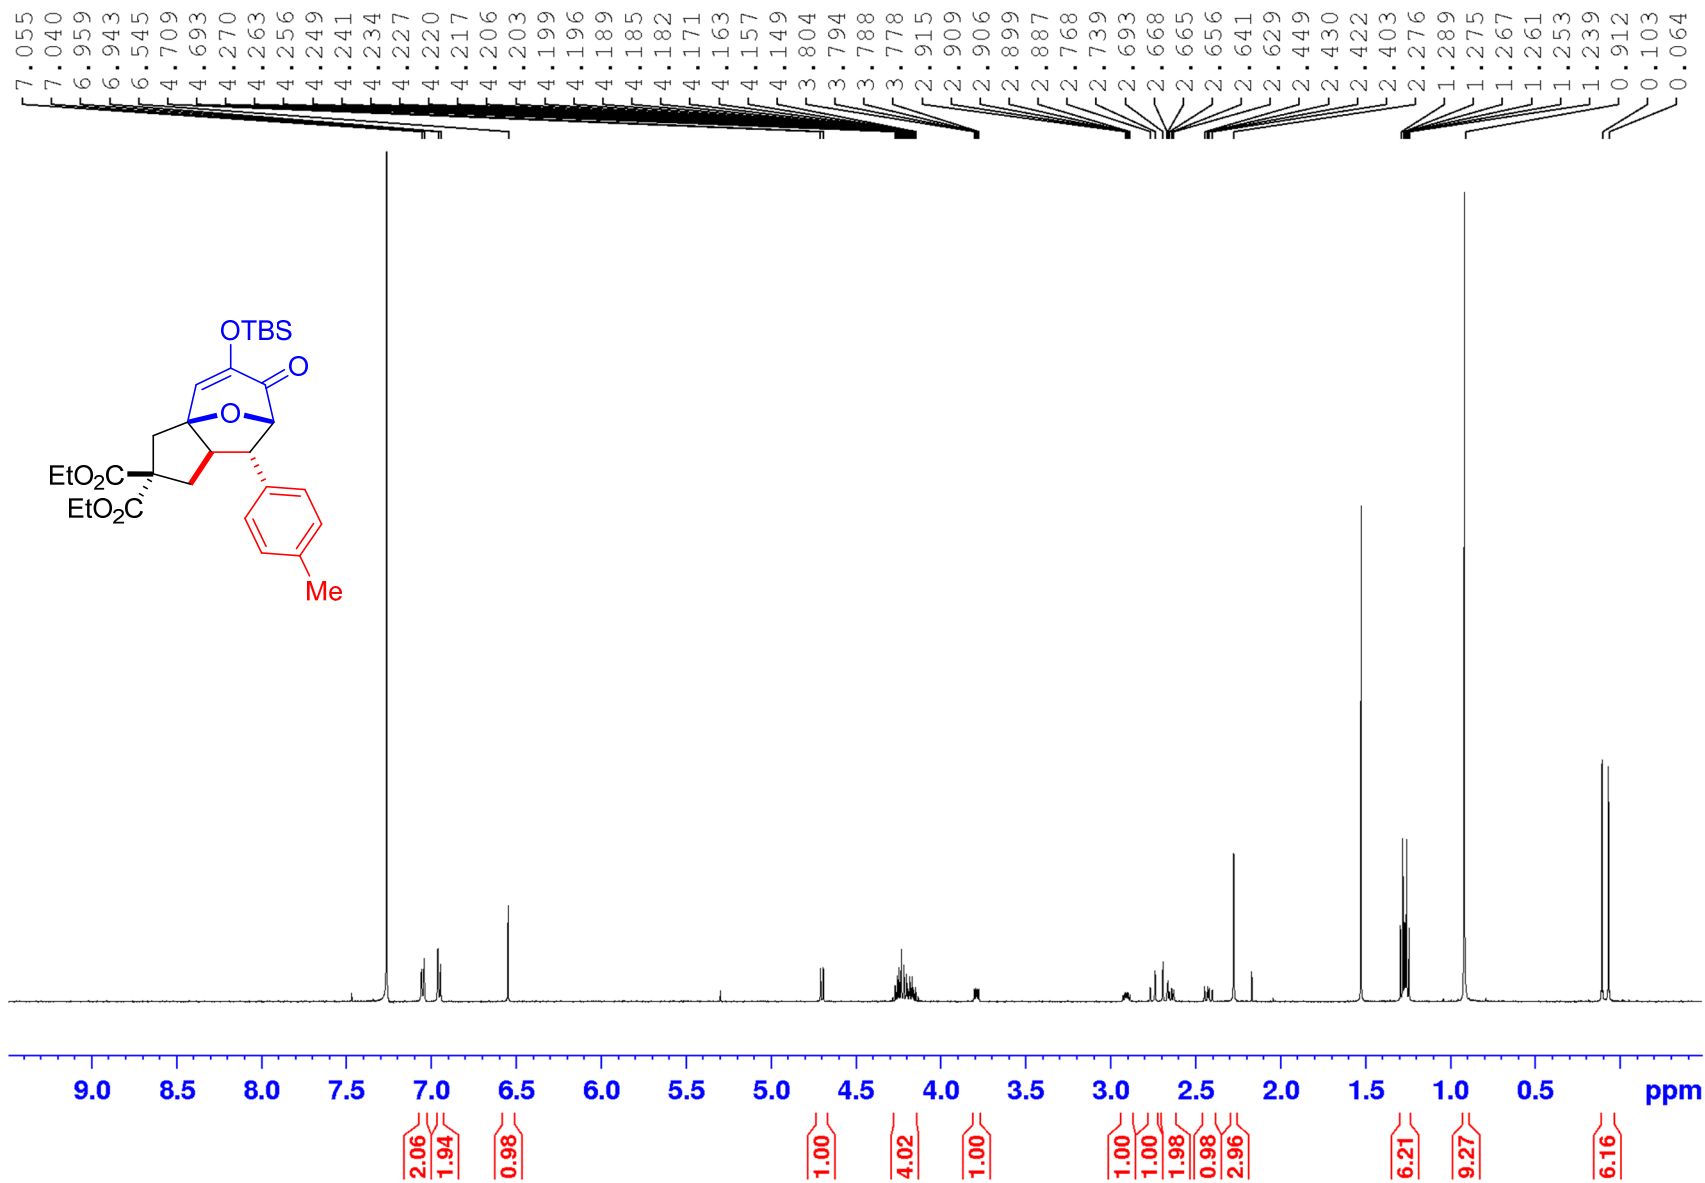

<sup>1</sup>H NMR (500 MHz) of 4f in CDCl<sub>3</sub>

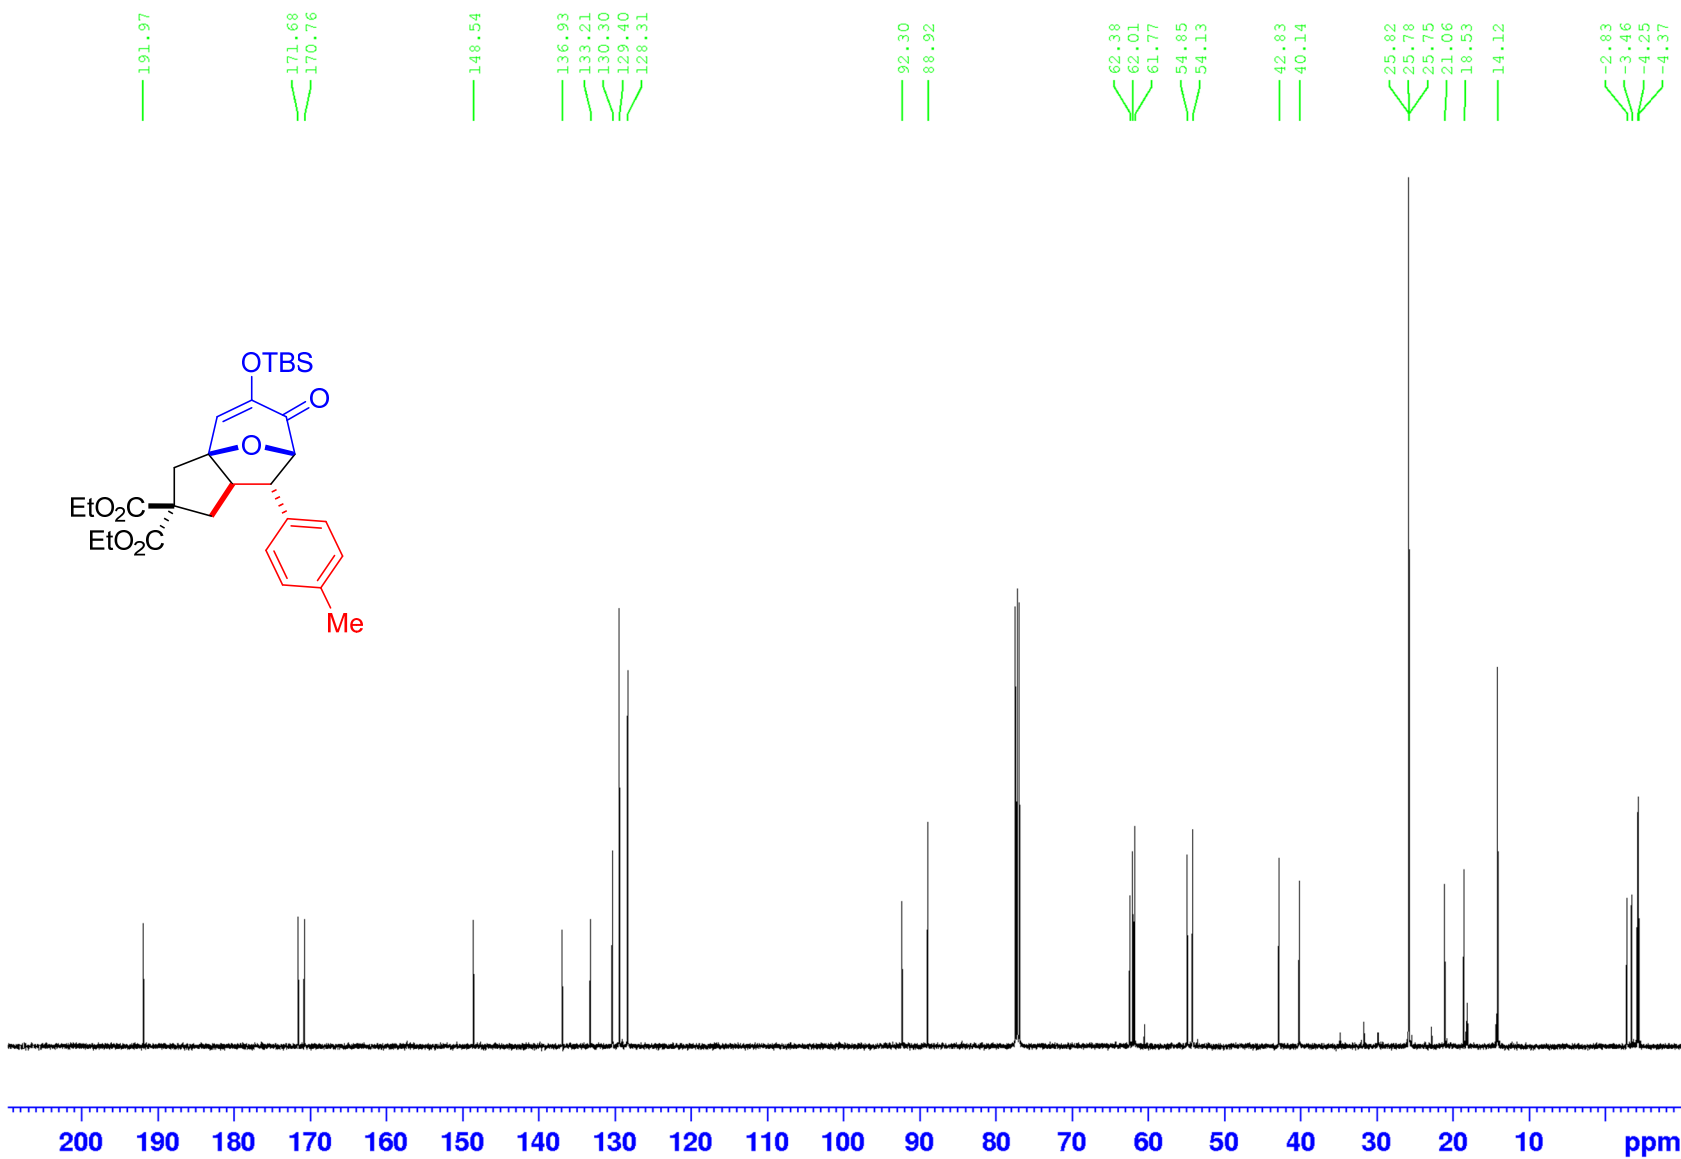

$^{13}\text{C}\{^1\text{H}\}$  NMR (125 MHz) of 4f in  $\text{CDCl}_3$

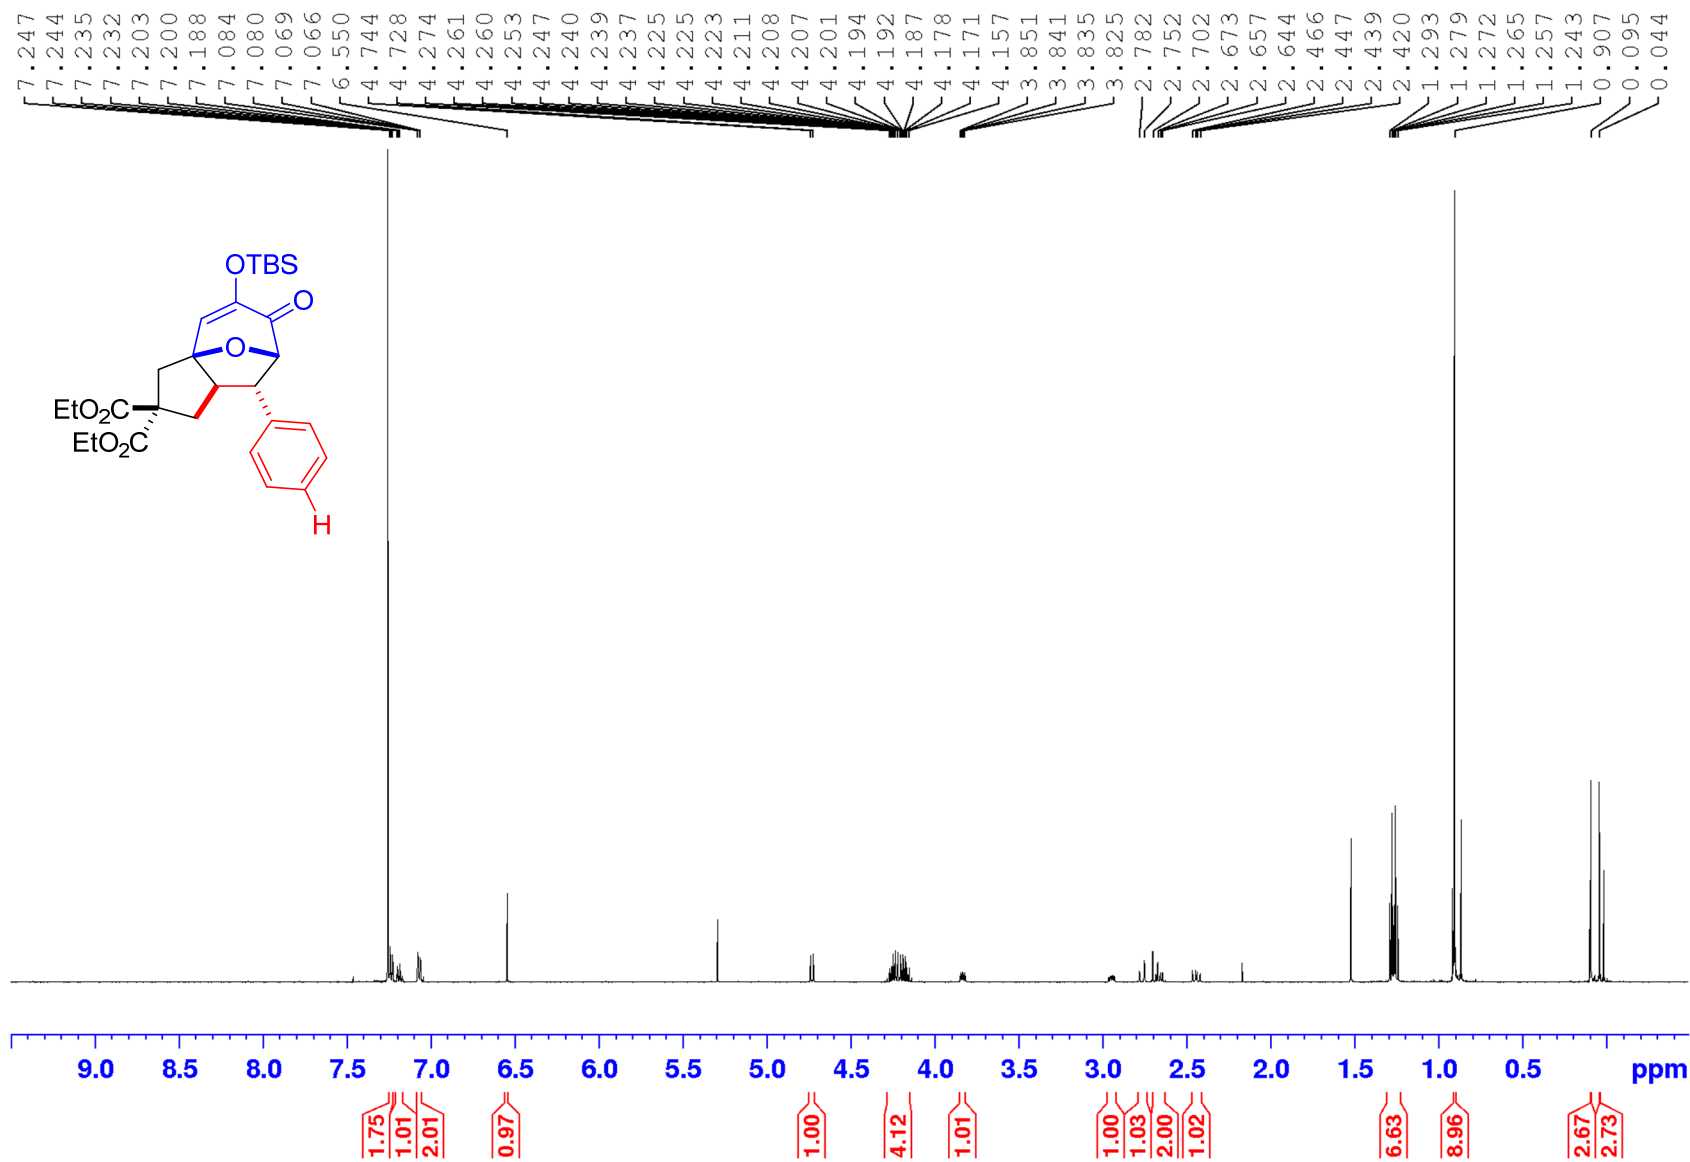

<sup>1</sup>H NMR (500 MHz) of 4g in CDCl<sub>3</sub>

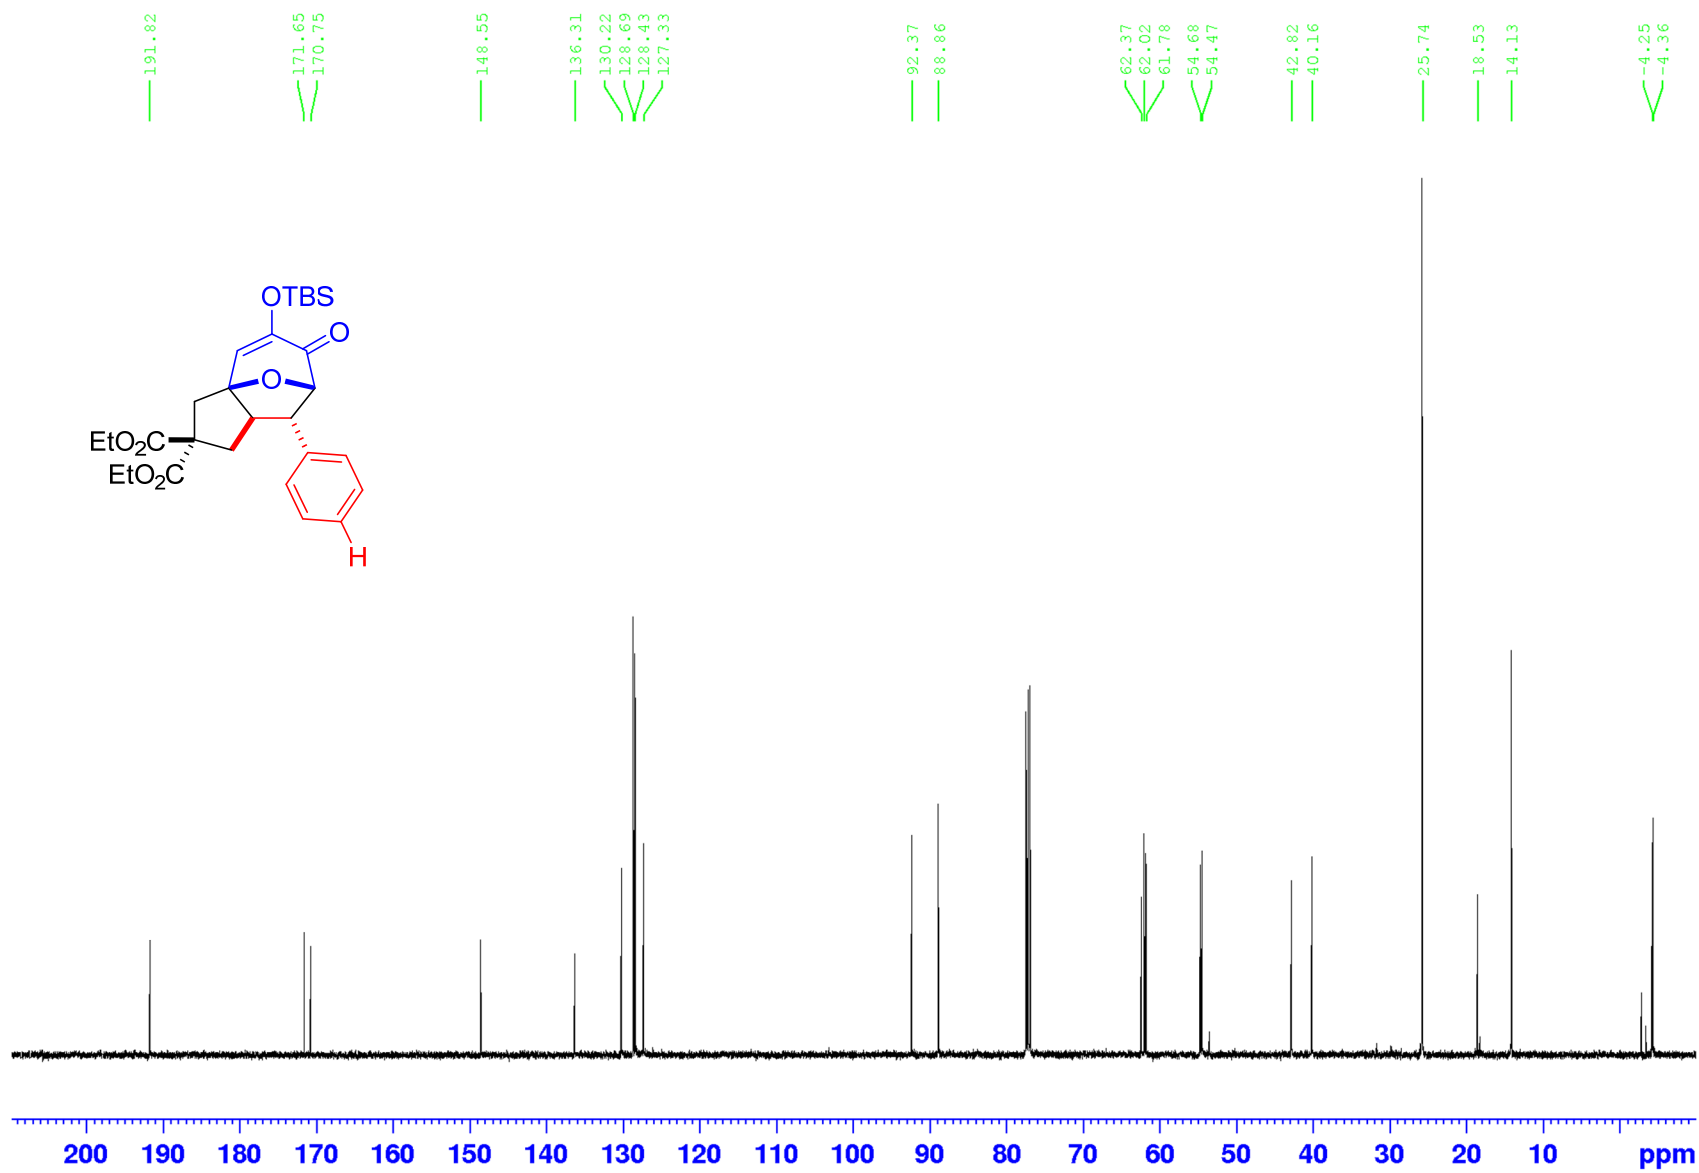

<sup>13</sup>C{<sup>1</sup>H} NMR (125 MHz) of 4g in CDCl<sub>3</sub>

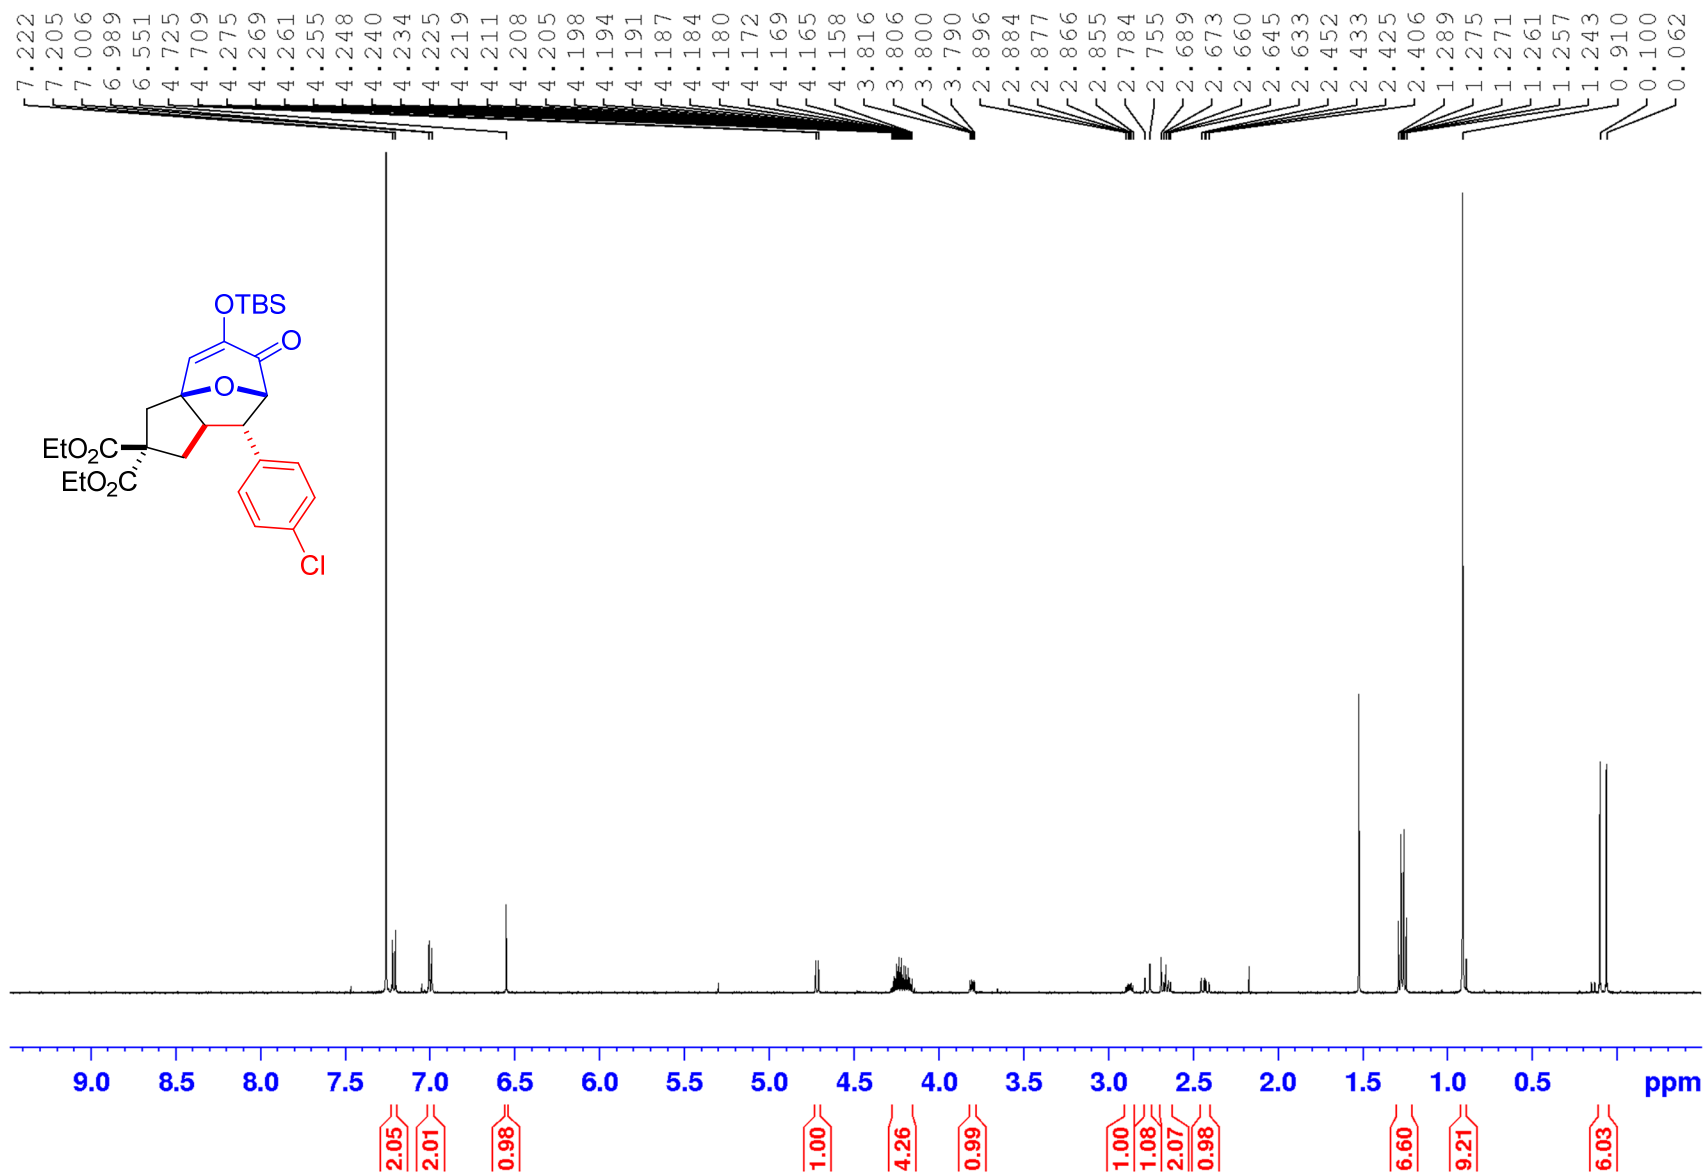

<sup>1</sup>H NMR (500 MHz) of 4h in CDCl<sub>3</sub>

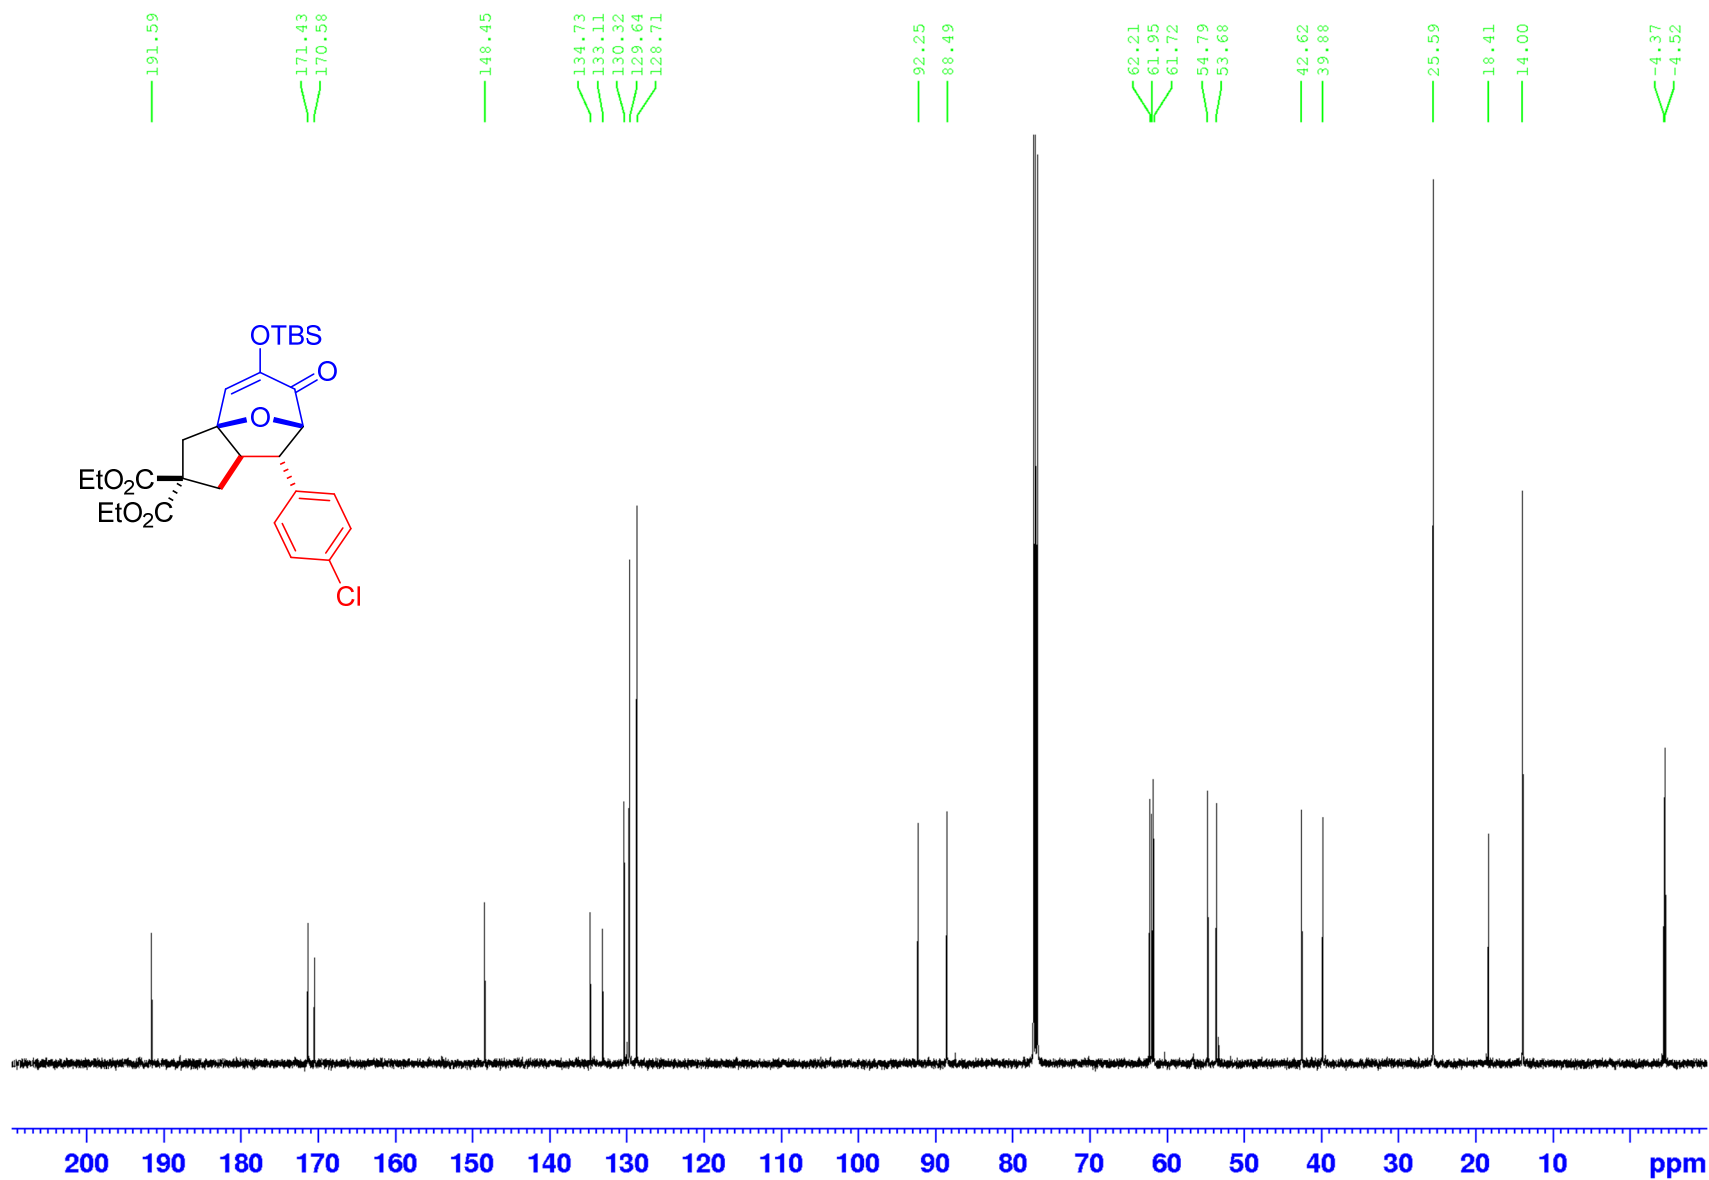

$^{13}\text{C}\{^1\text{H}\}$  NMR (125 MHz) of 4h in  $\text{CDCl}_3$

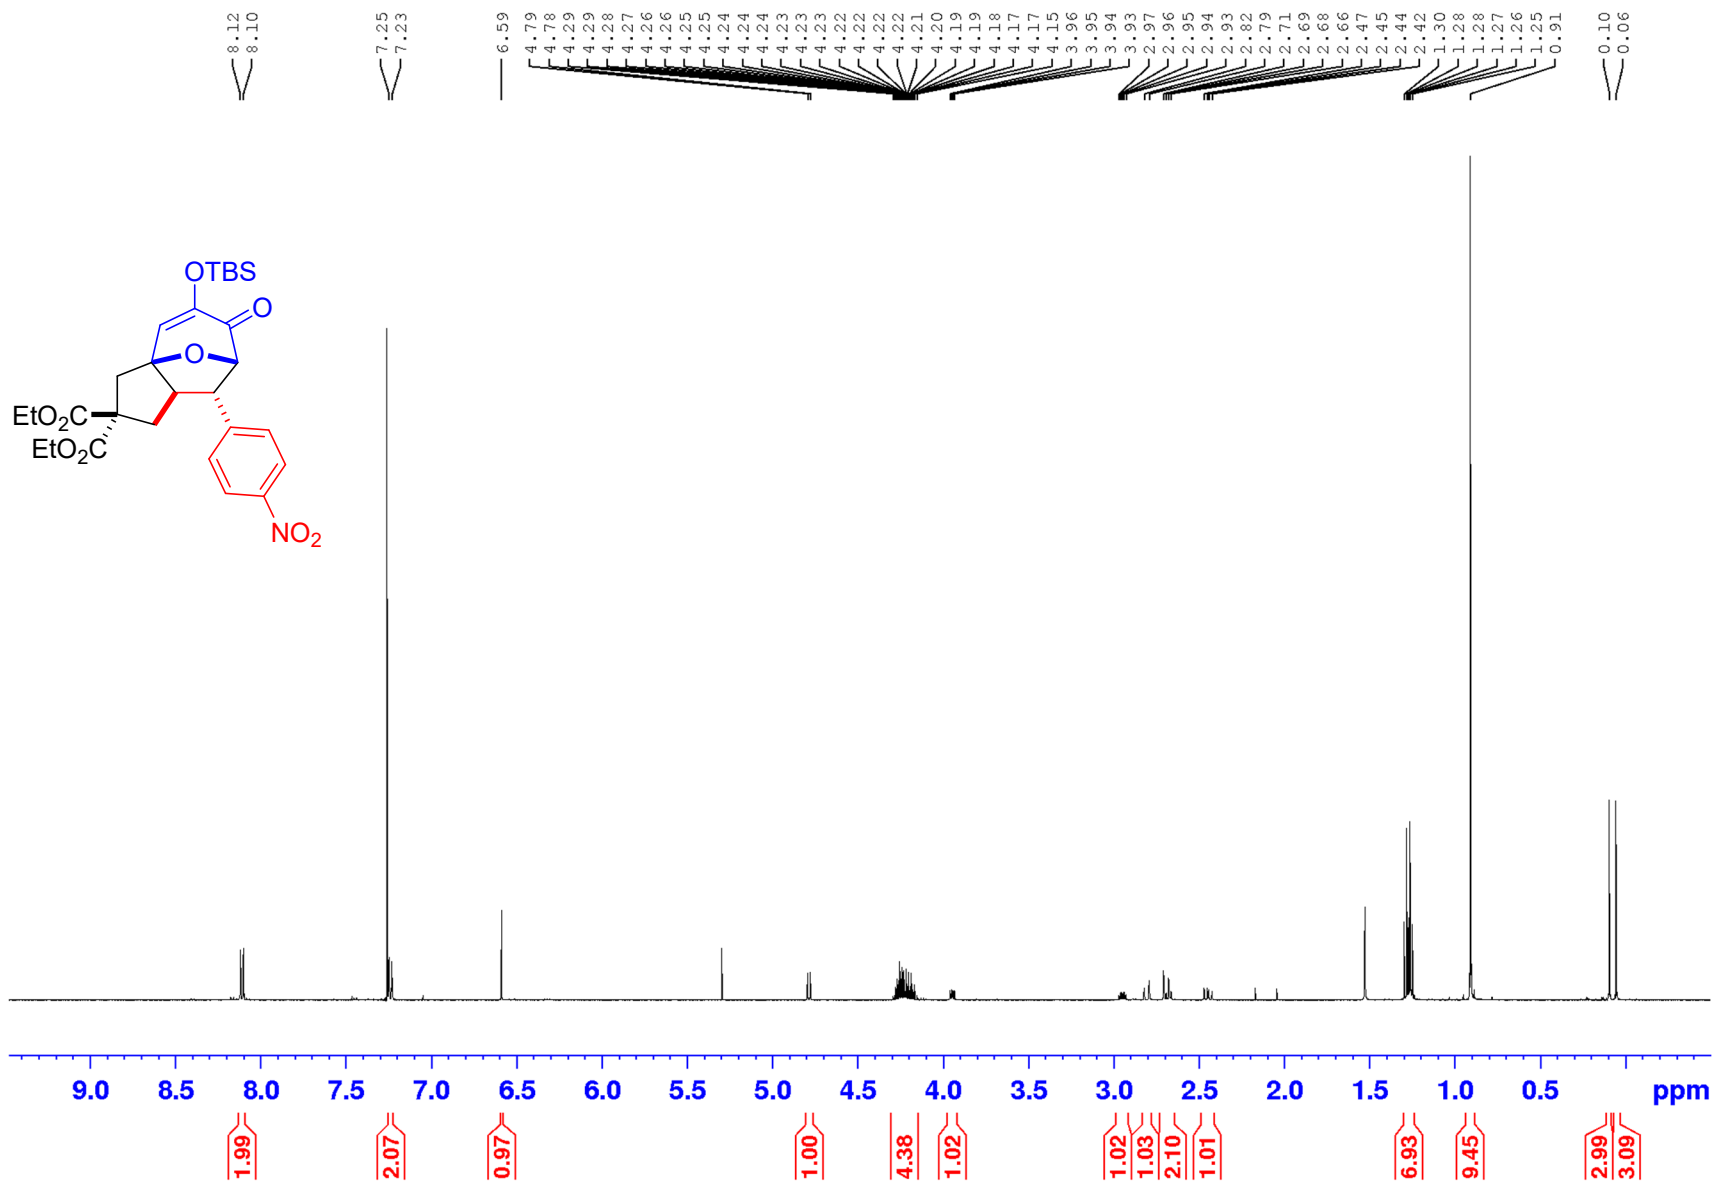

<sup>1</sup>H NMR (500 MHz) of 4i in CDCl<sub>3</sub>

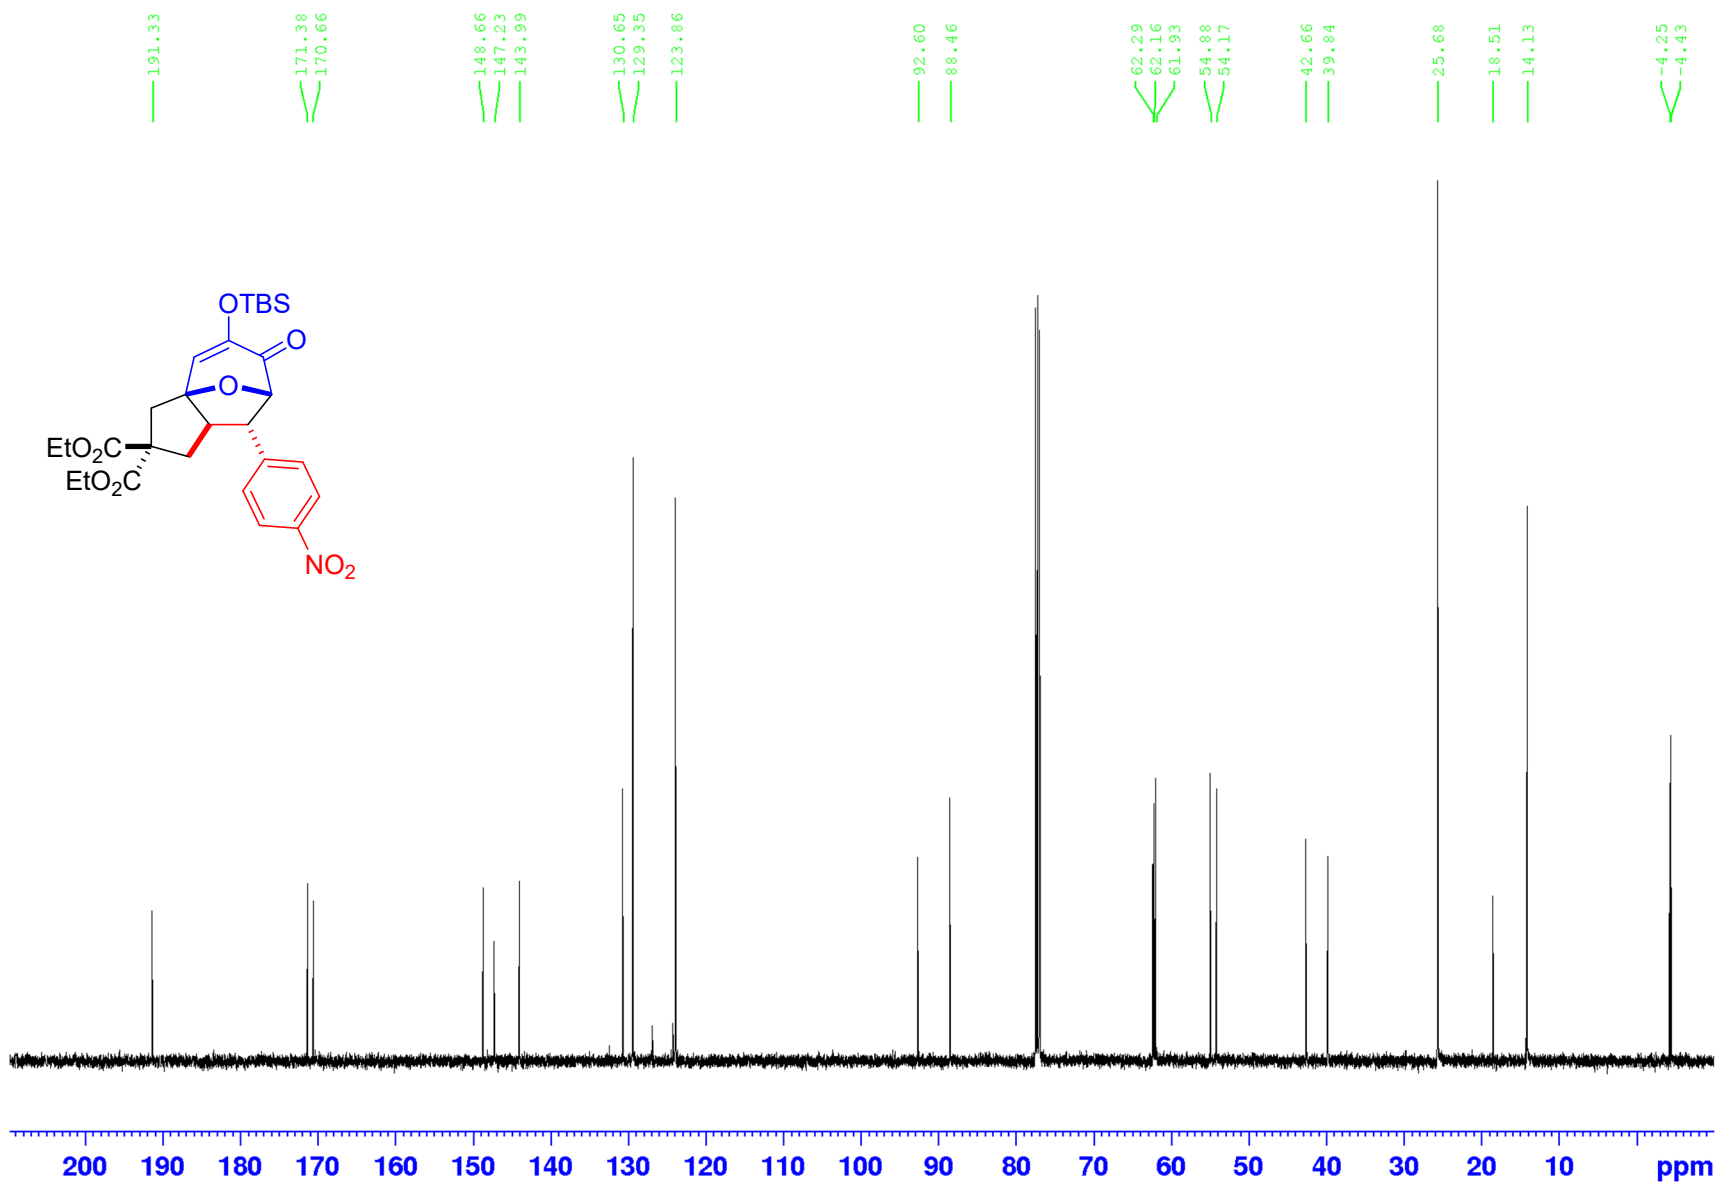

$^{13}\text{C}\{^1\text{H}\}$  NMR (125 MHz) of 4i in  $\text{CDCl}_3$

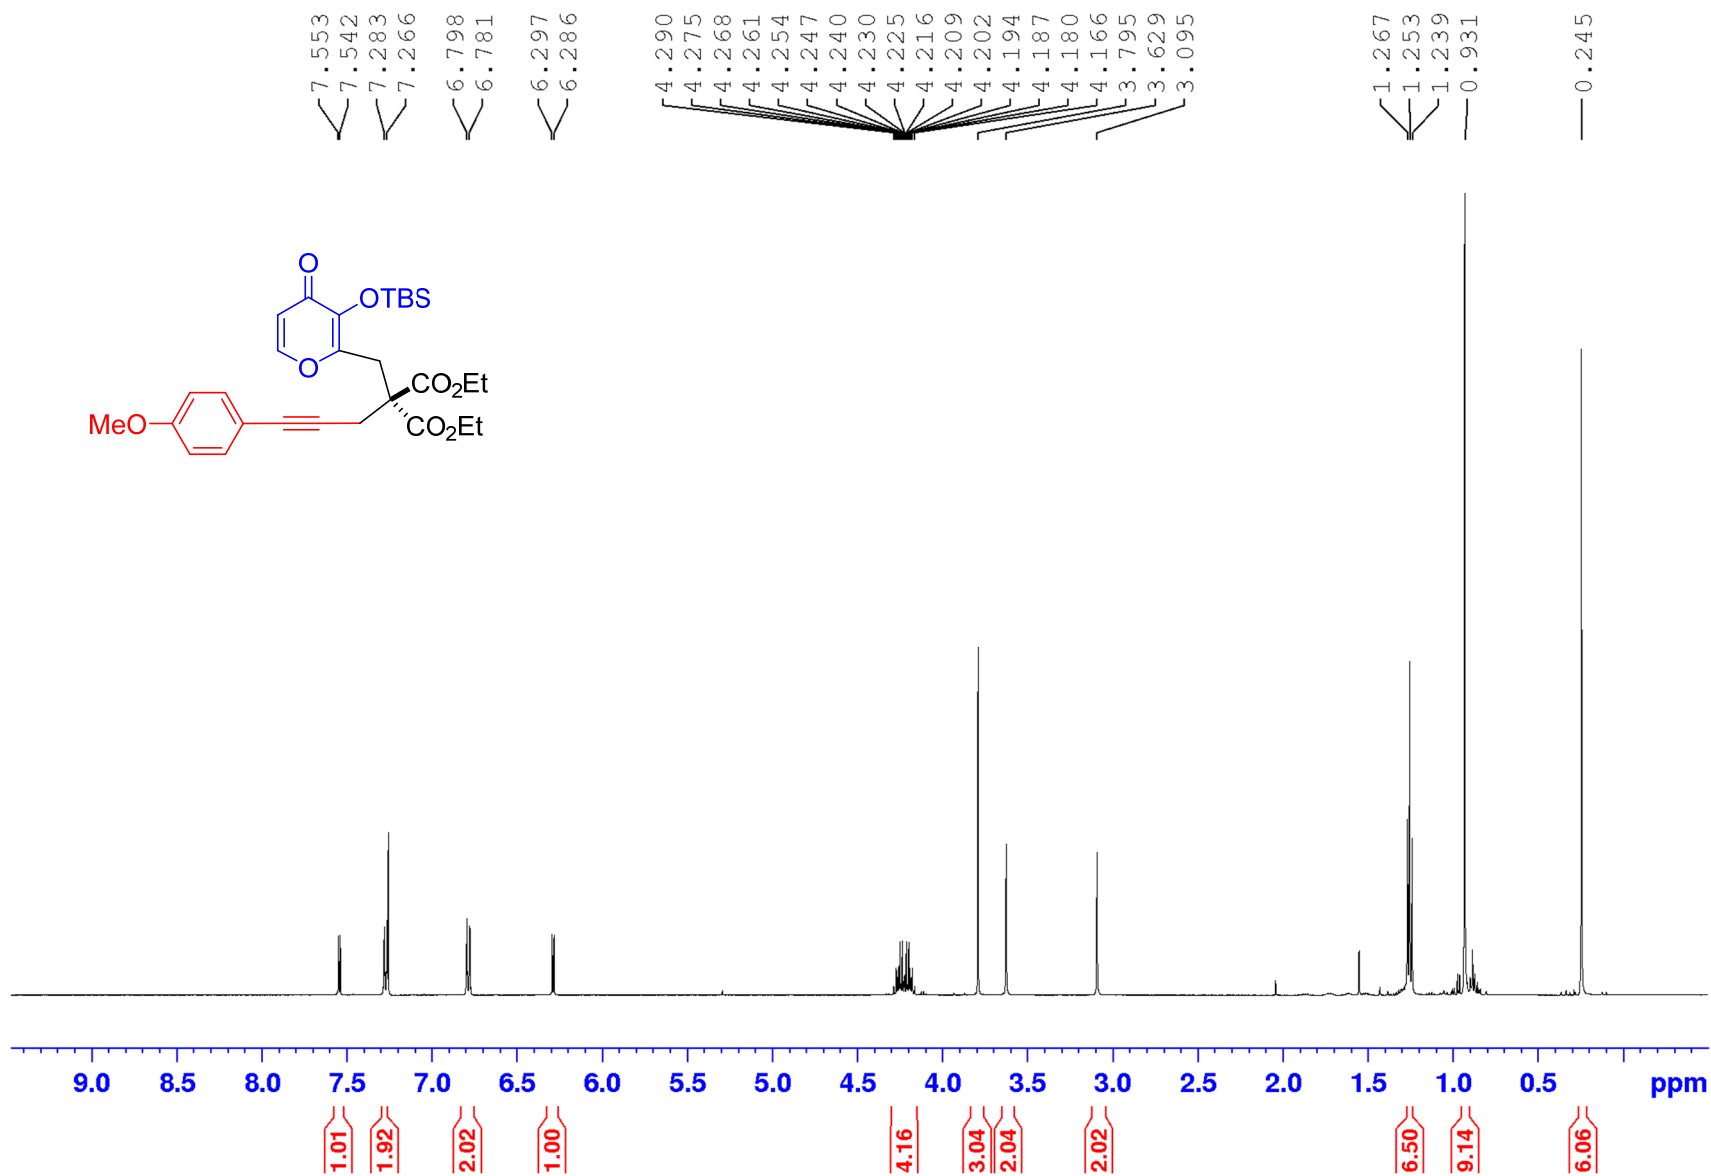

<sup>1</sup>H NMR (500 MHz) of S15 in CDCl<sub>3</sub>

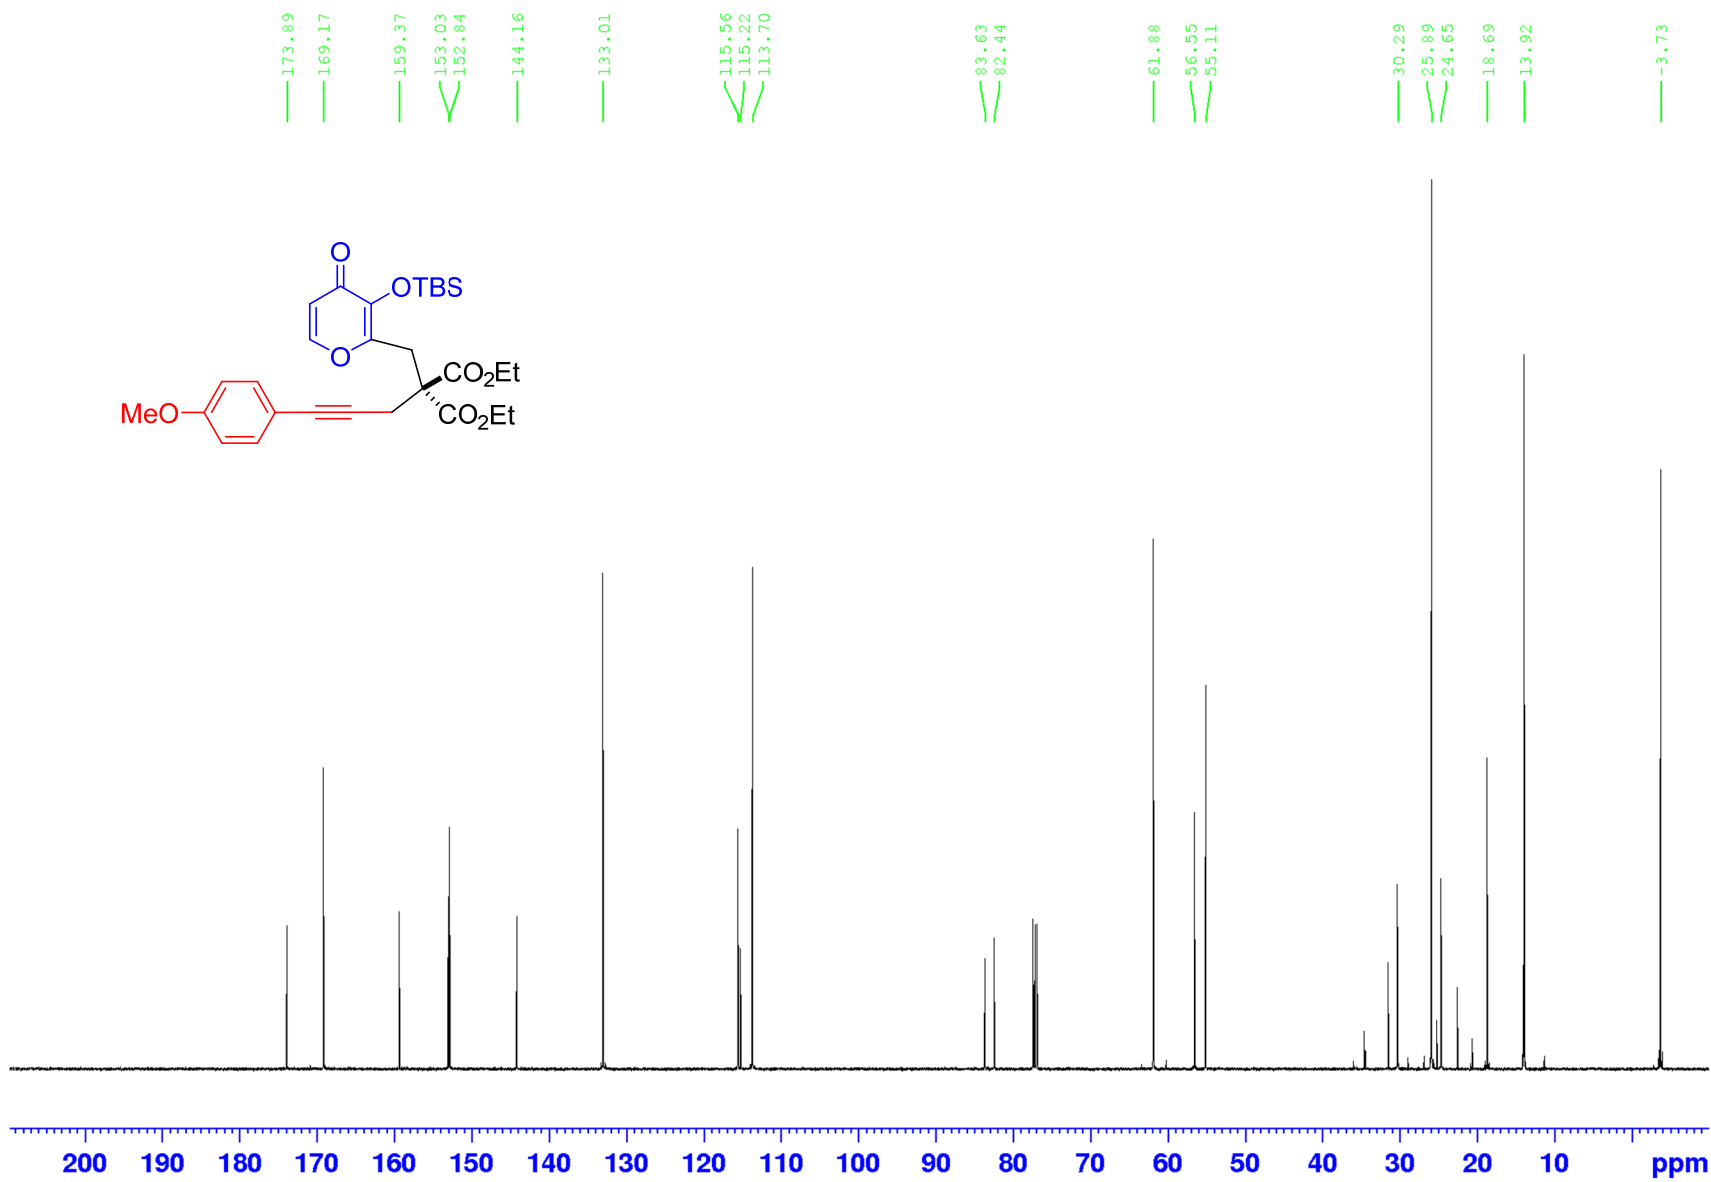

$^{13}\text{C}\{^1\text{H}\}$  NMR (125 MHz) of S15 in  $\text{CDCl}_3$

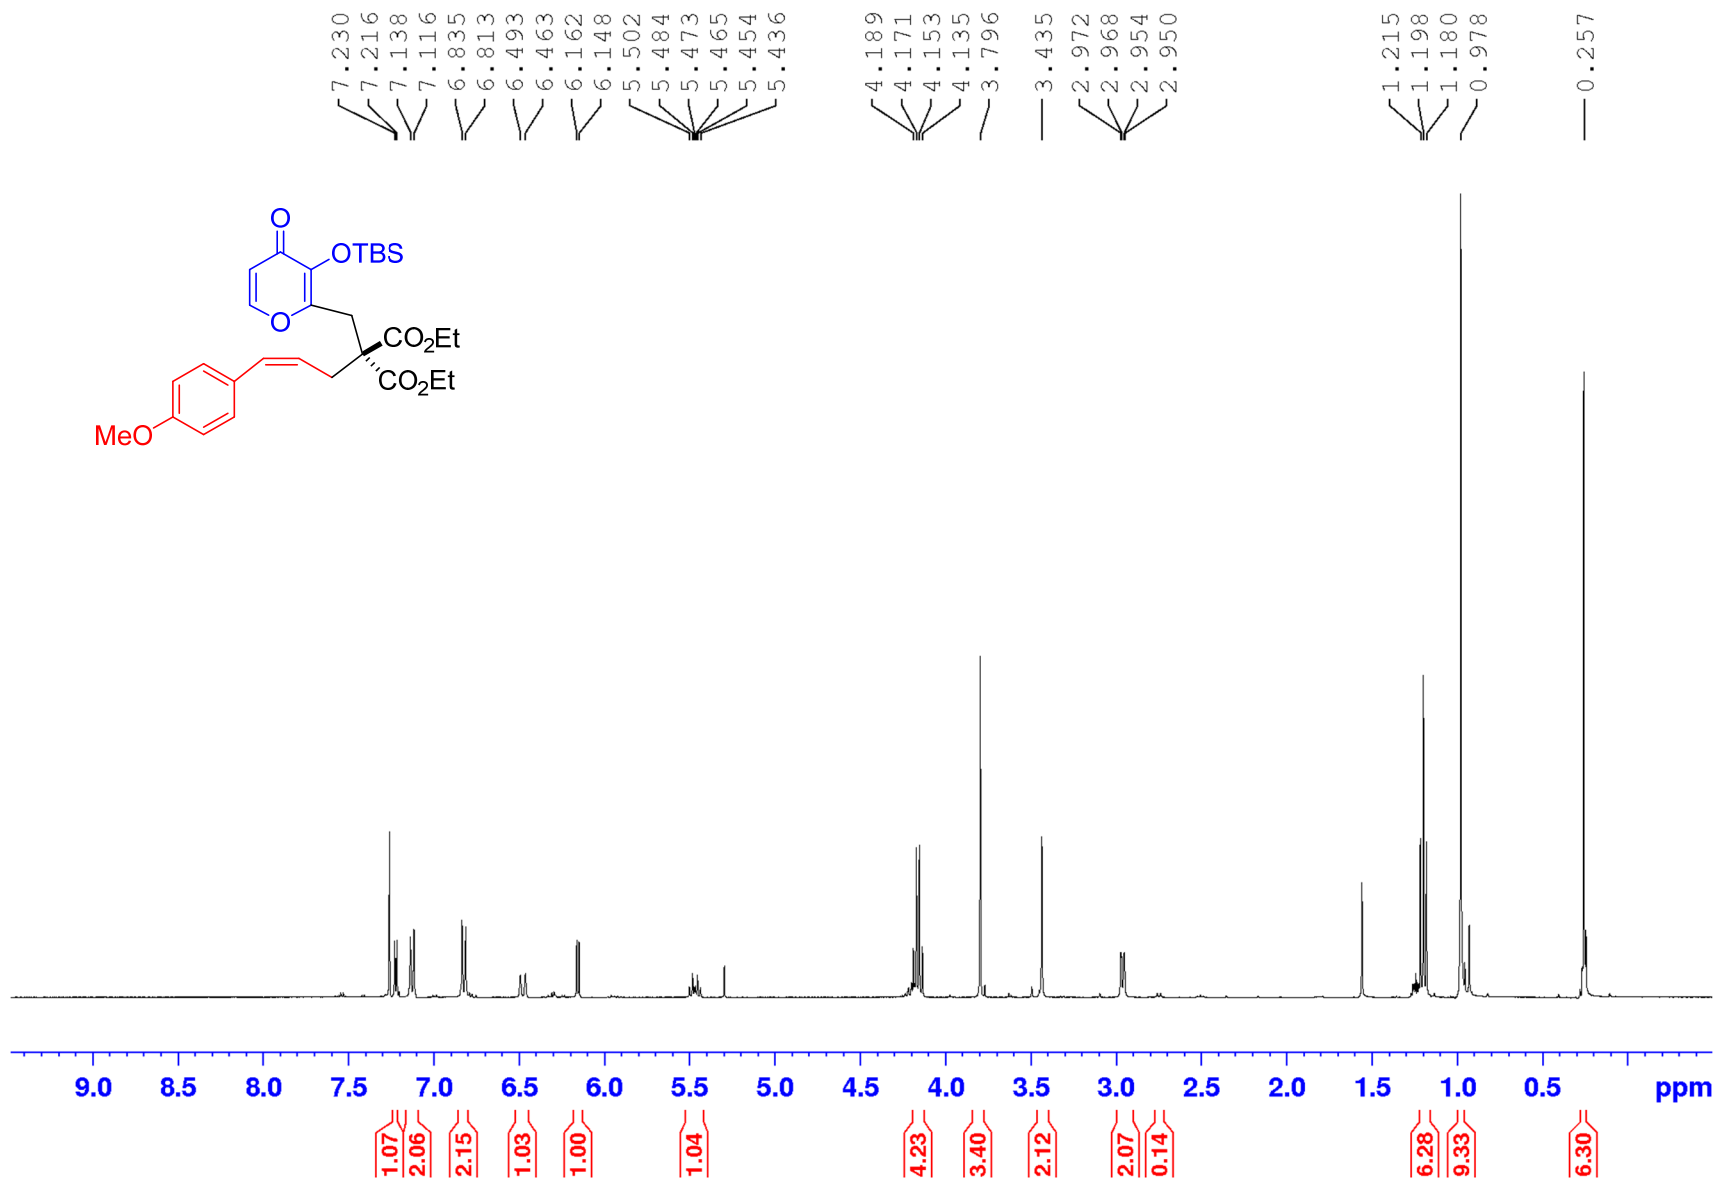

<sup>1</sup>H NMR (400 MHz) of *cis*-1s in CDCl<sub>3</sub>

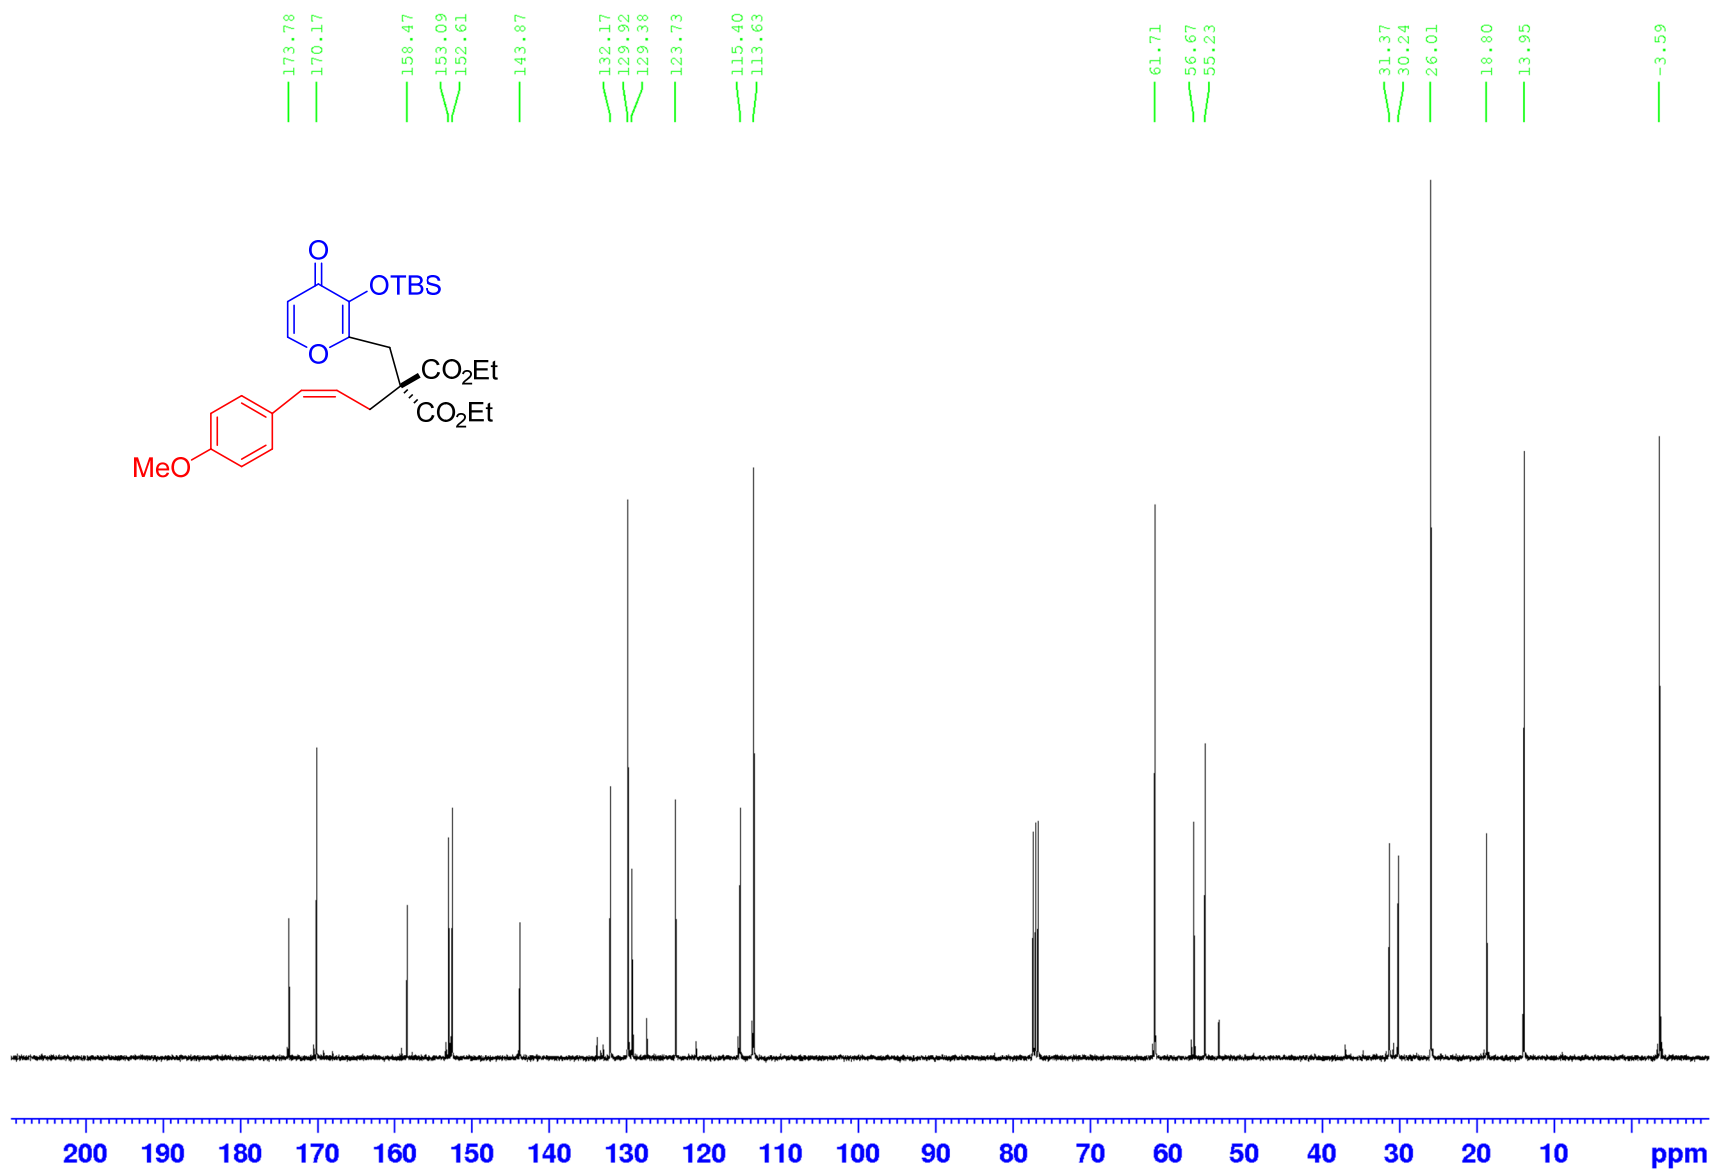

<sup>13</sup>C{<sup>1</sup>H} NMR (100 MHz) of *cis*-1s in CDCl<sub>3</sub>

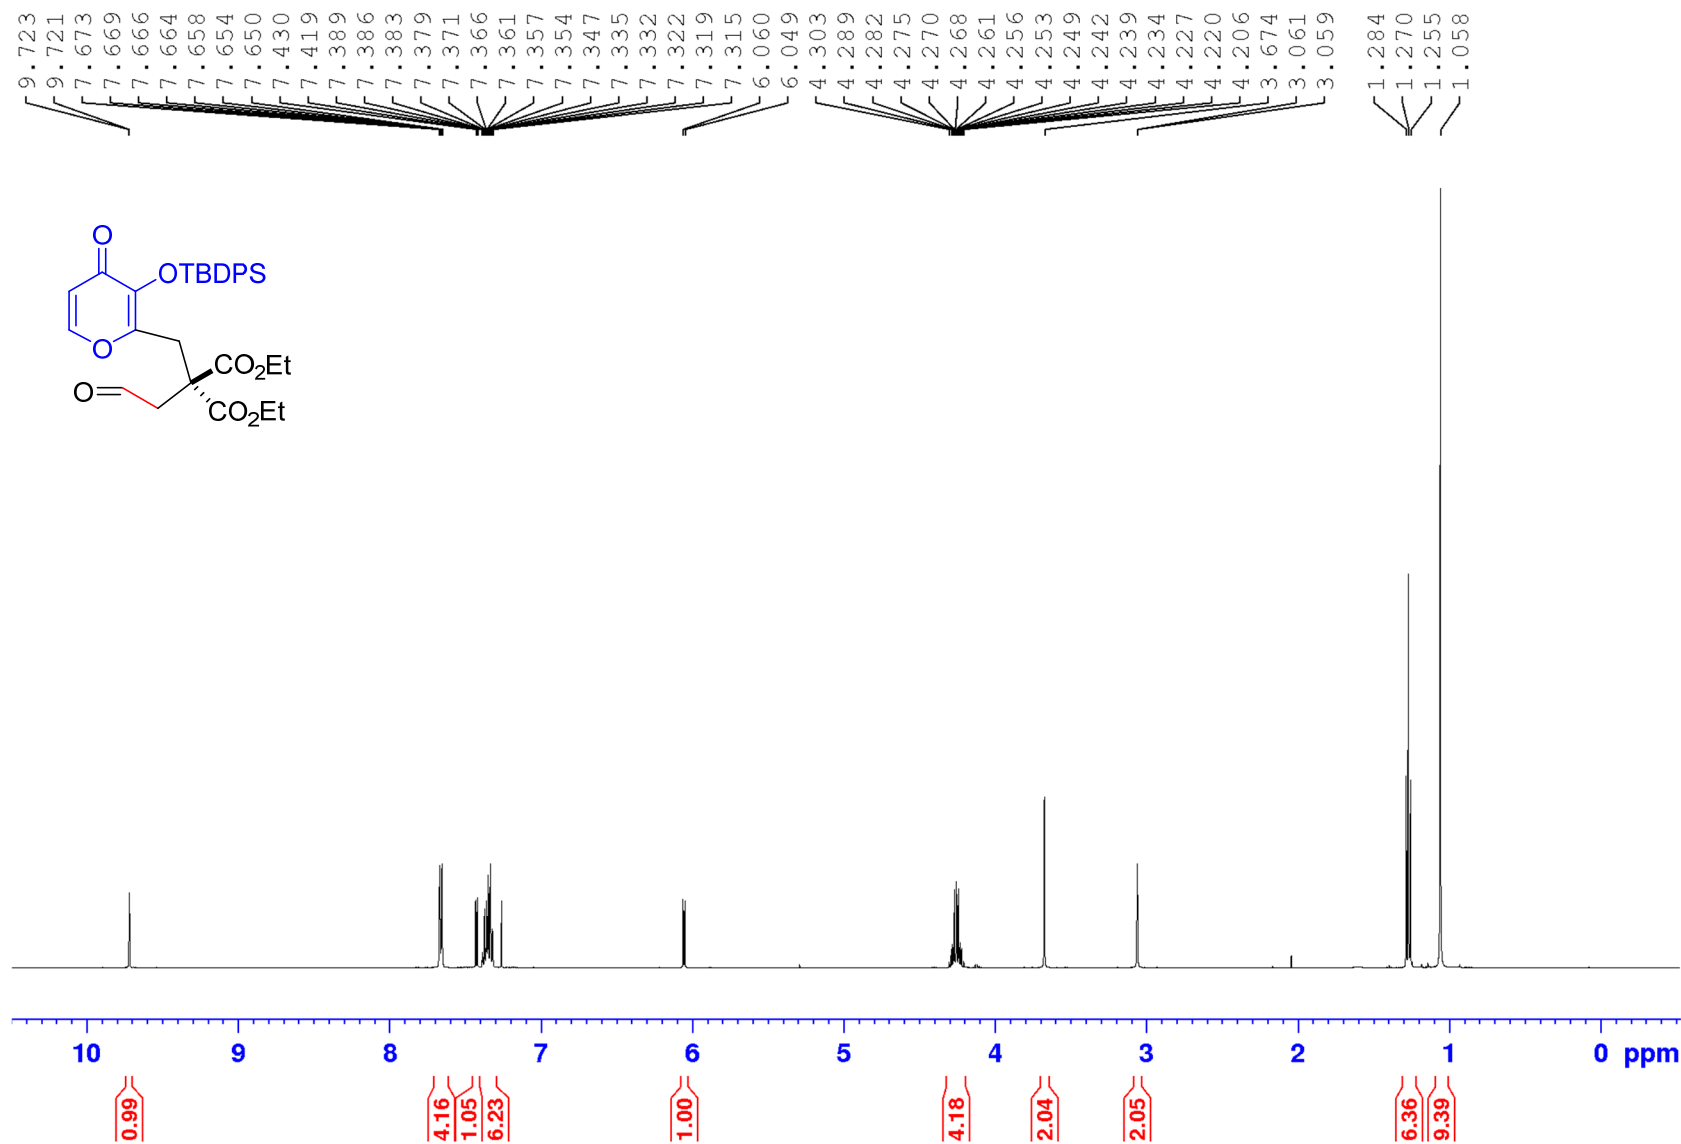

<sup>1</sup>H NMR (500 MHz) of 12 in CDCl<sub>3</sub>

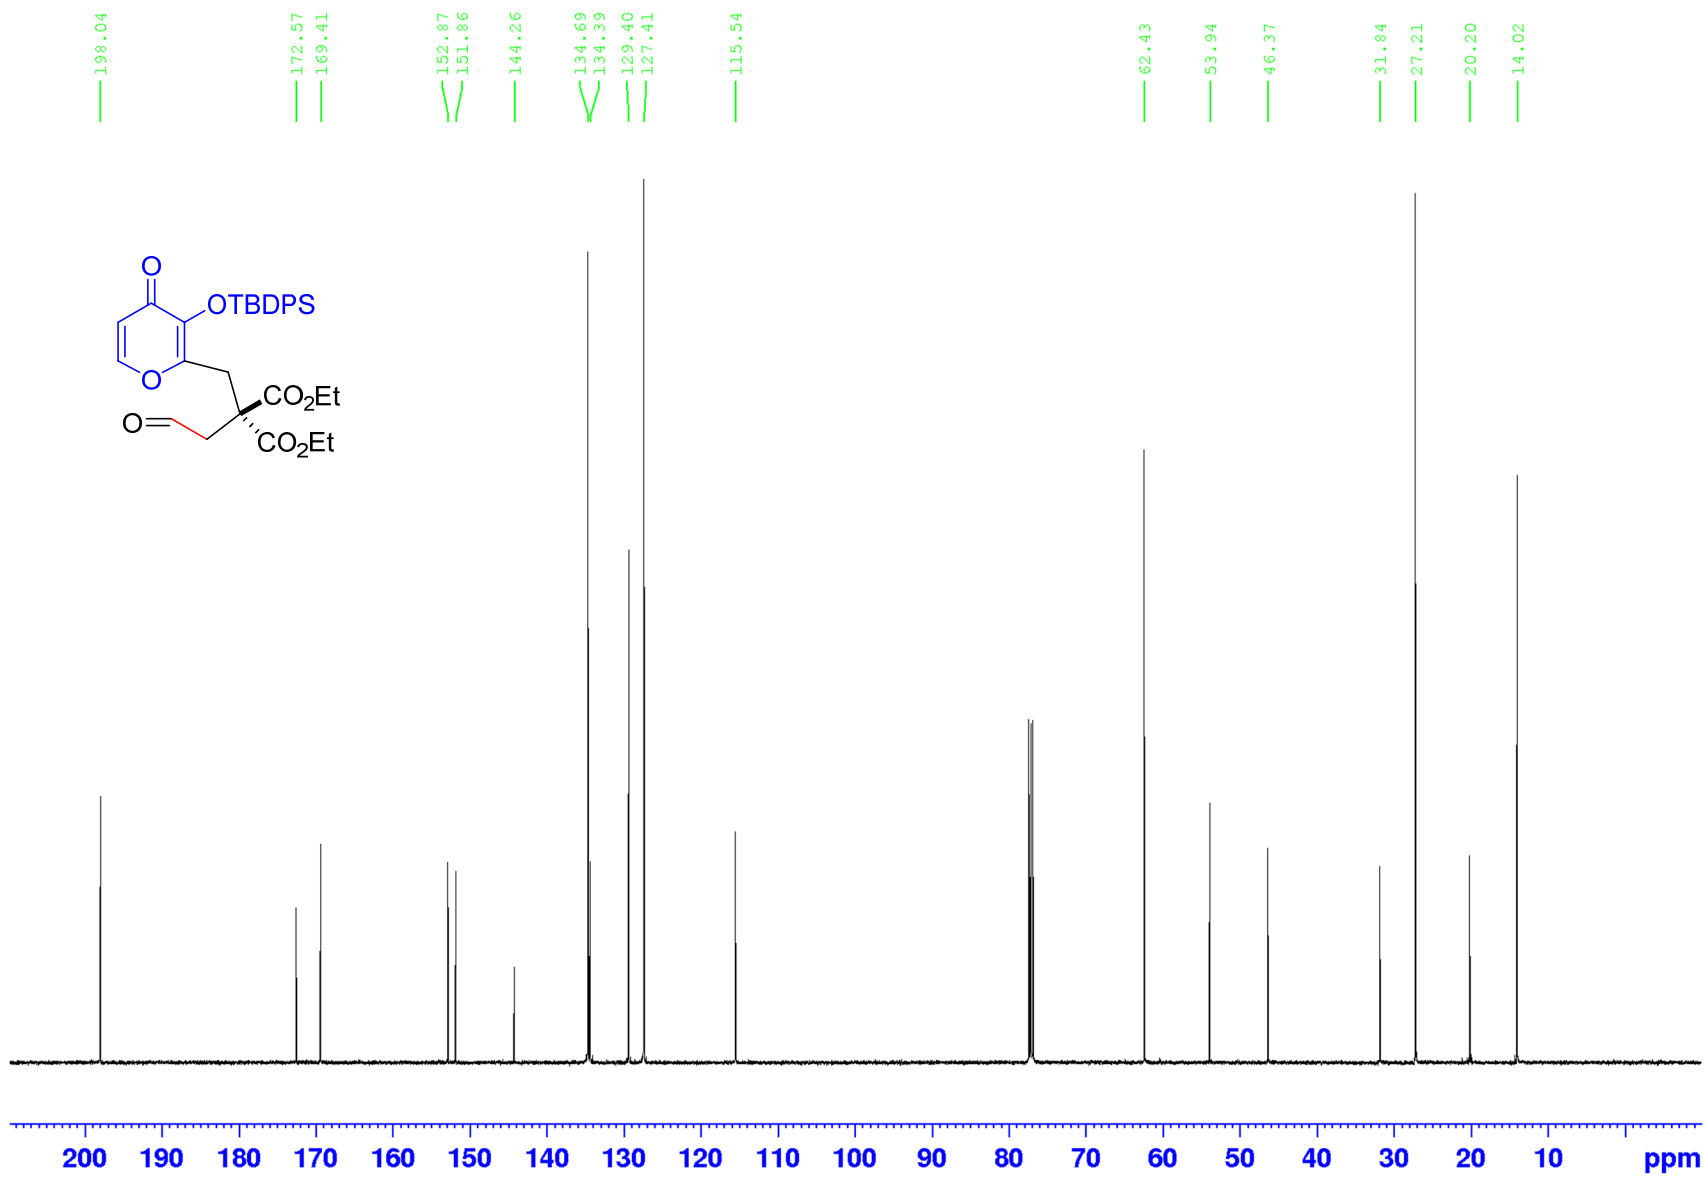

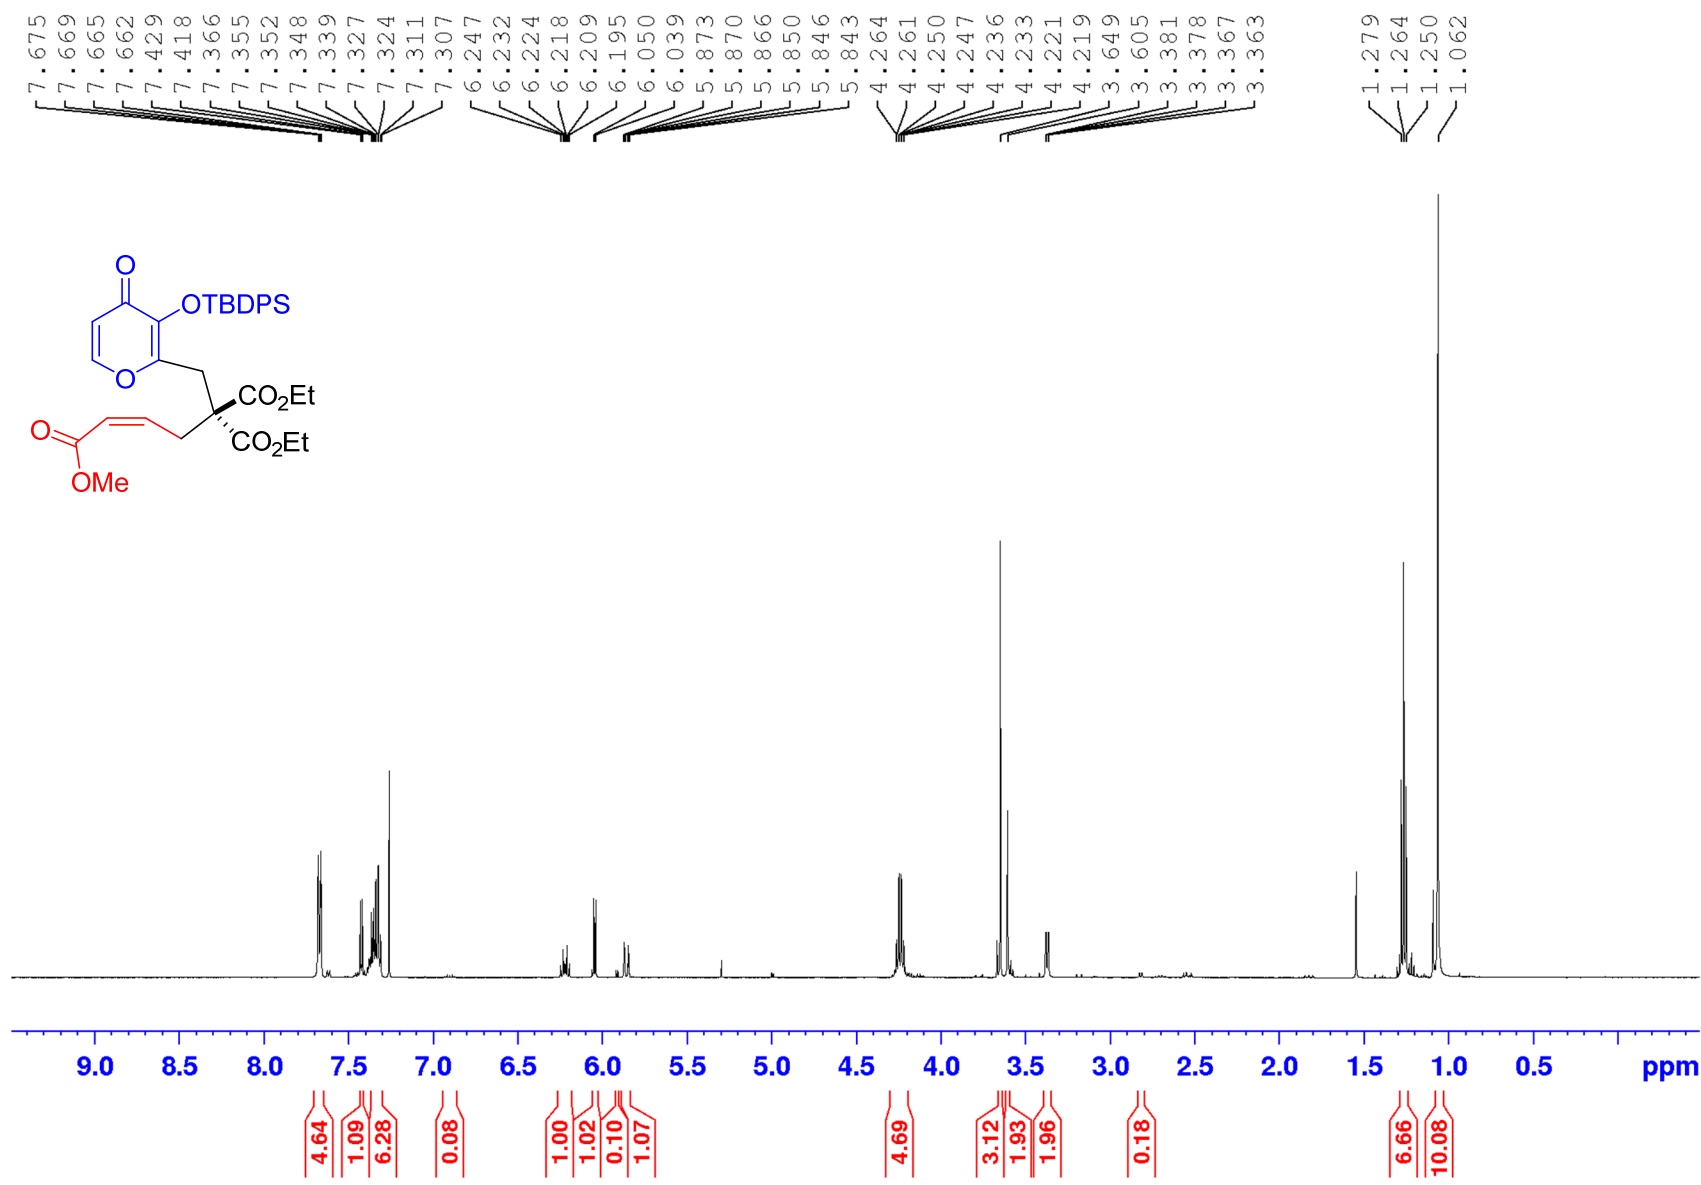

<sup>1</sup>H NMR (500 MHz) of *cis*-1g in CDCl<sub>3</sub>

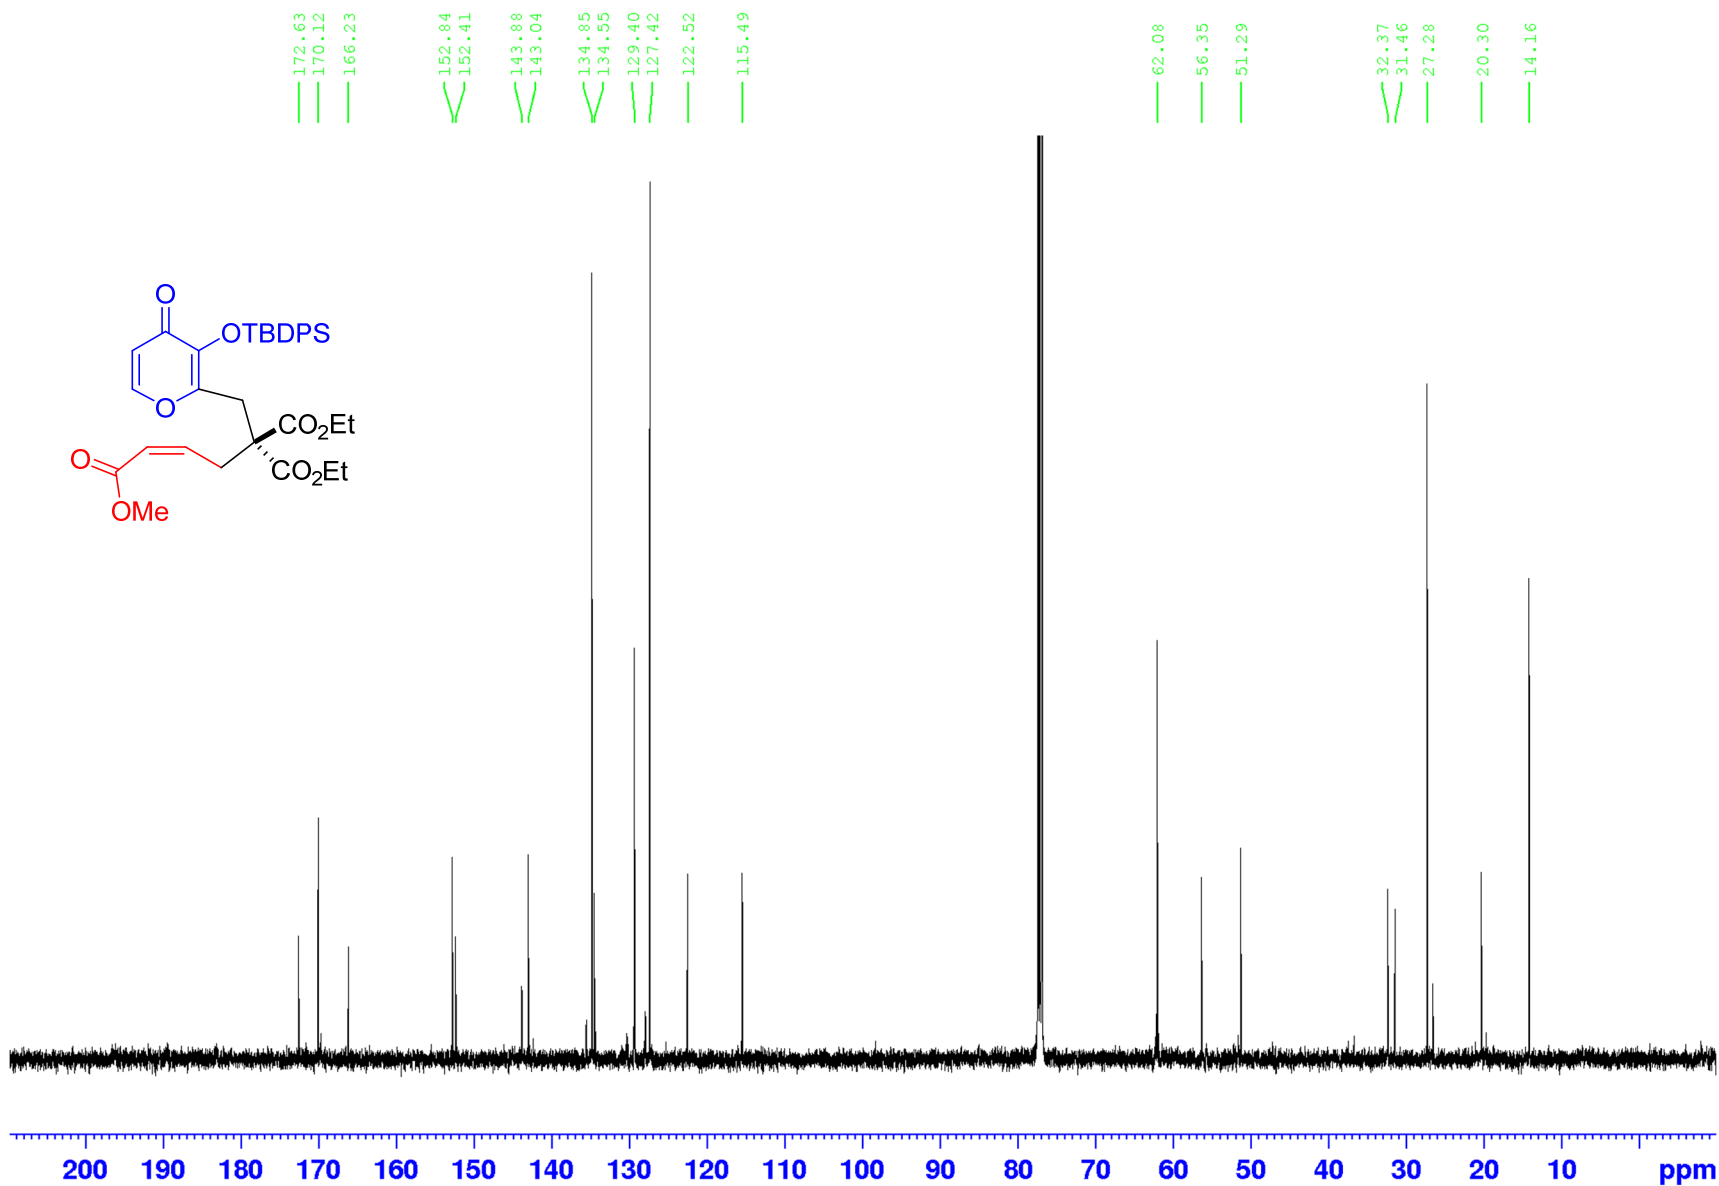

$^{13}\text{C}\{^1\text{H}\}$  NMR (125 MHz) of *cis*-1g in  $\text{CDCl}_3$

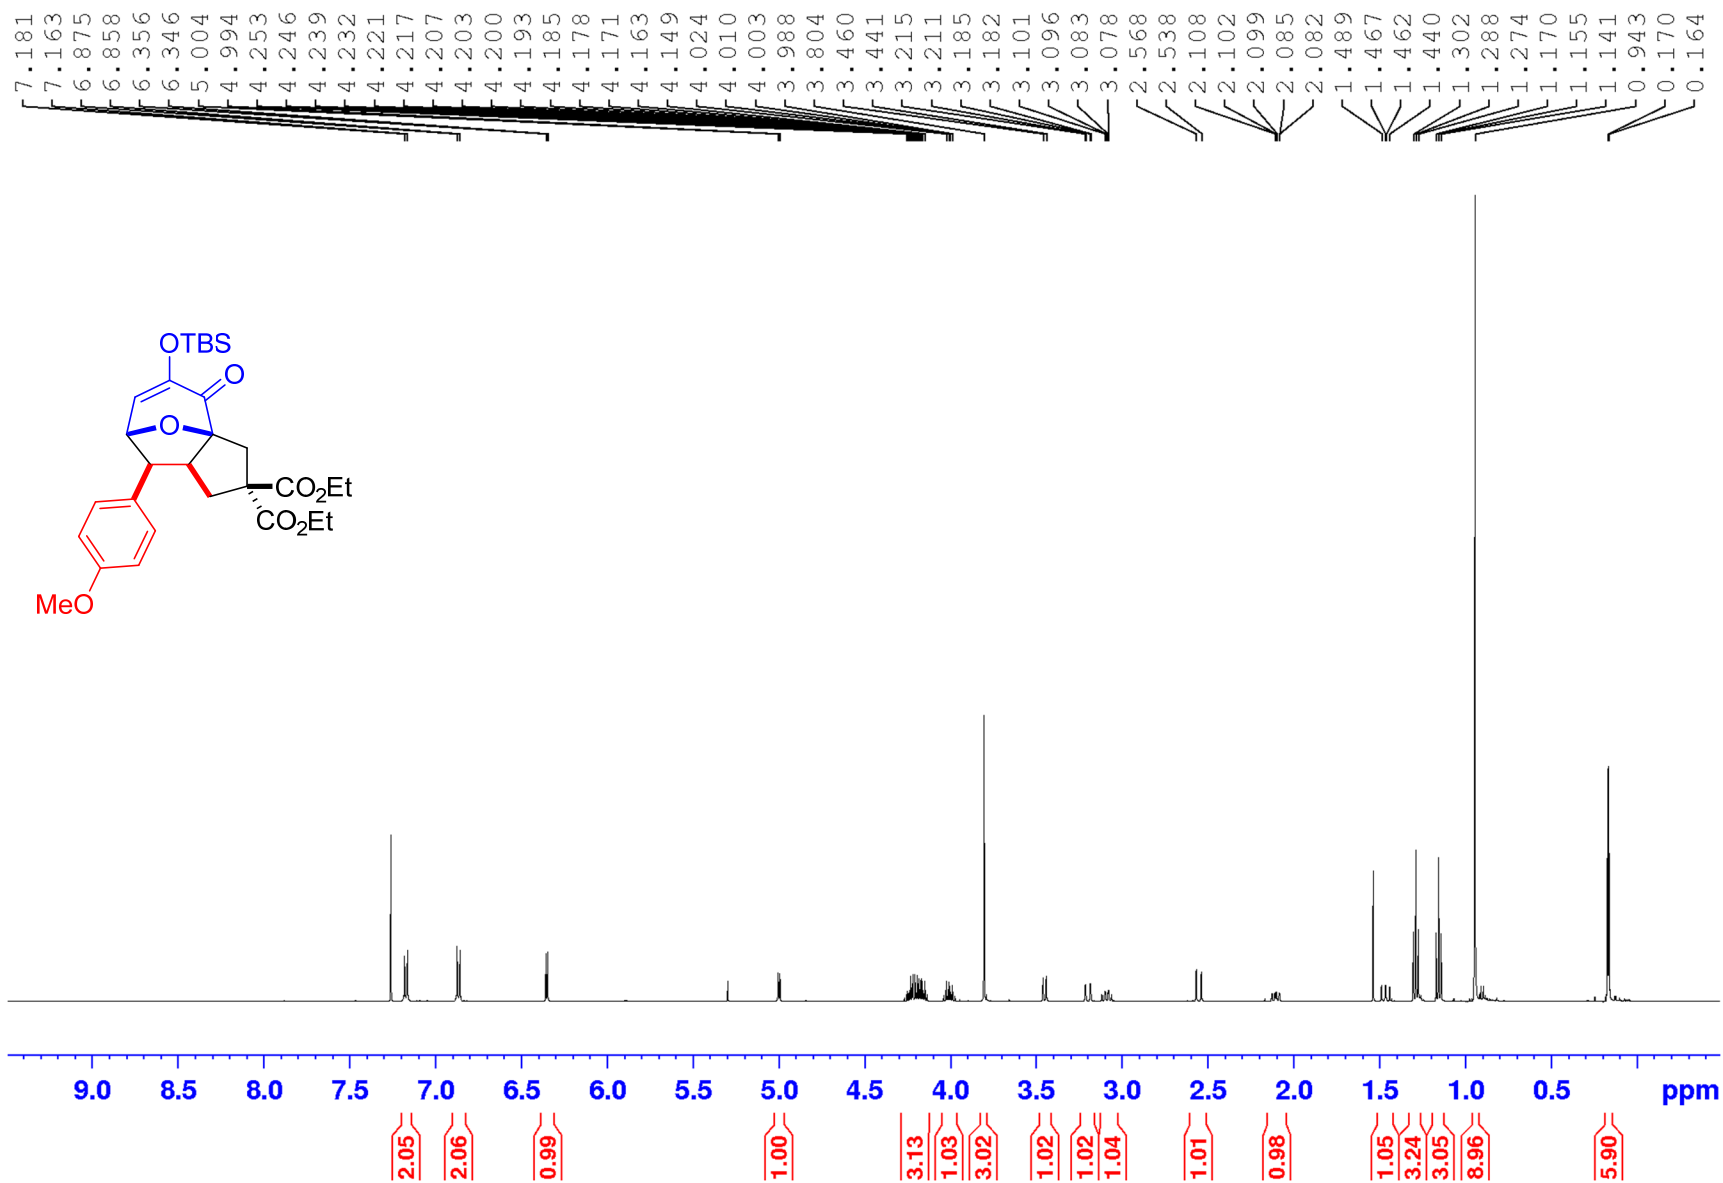

<sup>1</sup>H NMR (500 MHz) of *cis*-2s in CDCl<sub>3</sub>

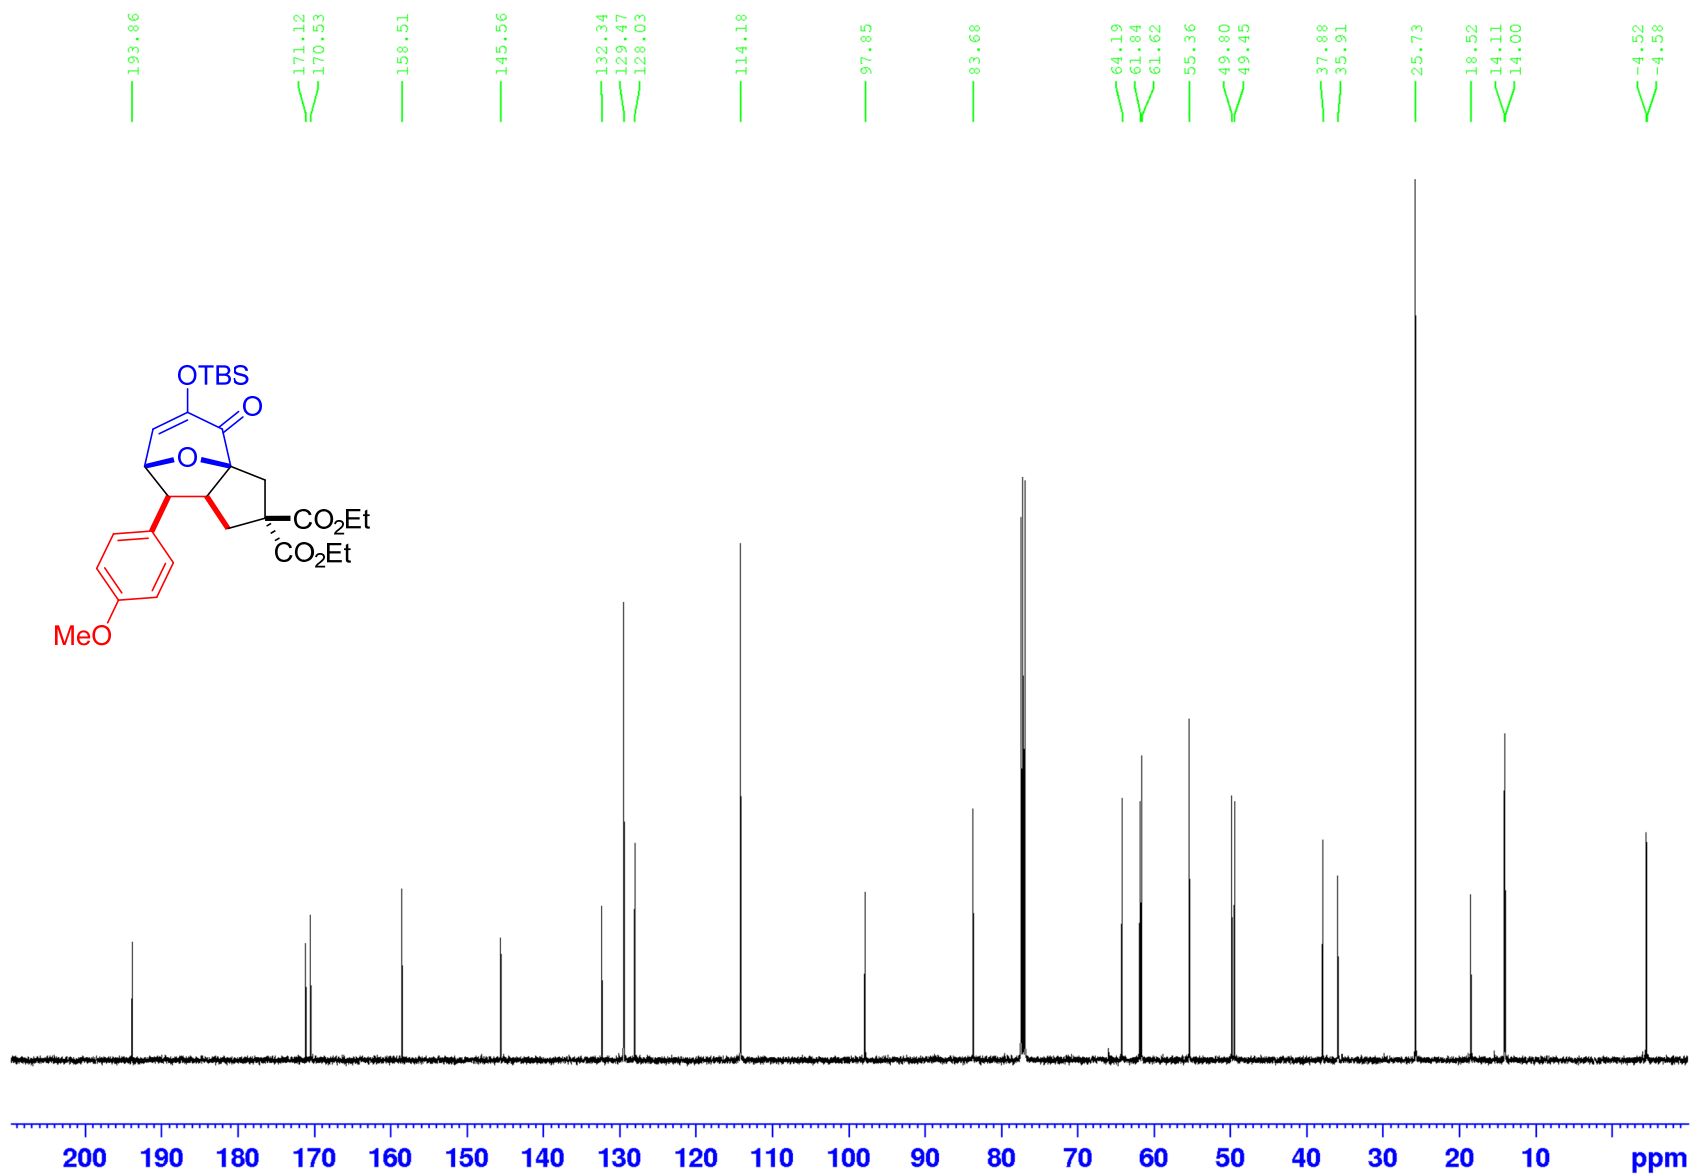

<sup>13</sup>C{<sup>1</sup>H} NMR (125 MHz) of *cis*-2s in CDCl<sub>3</sub>

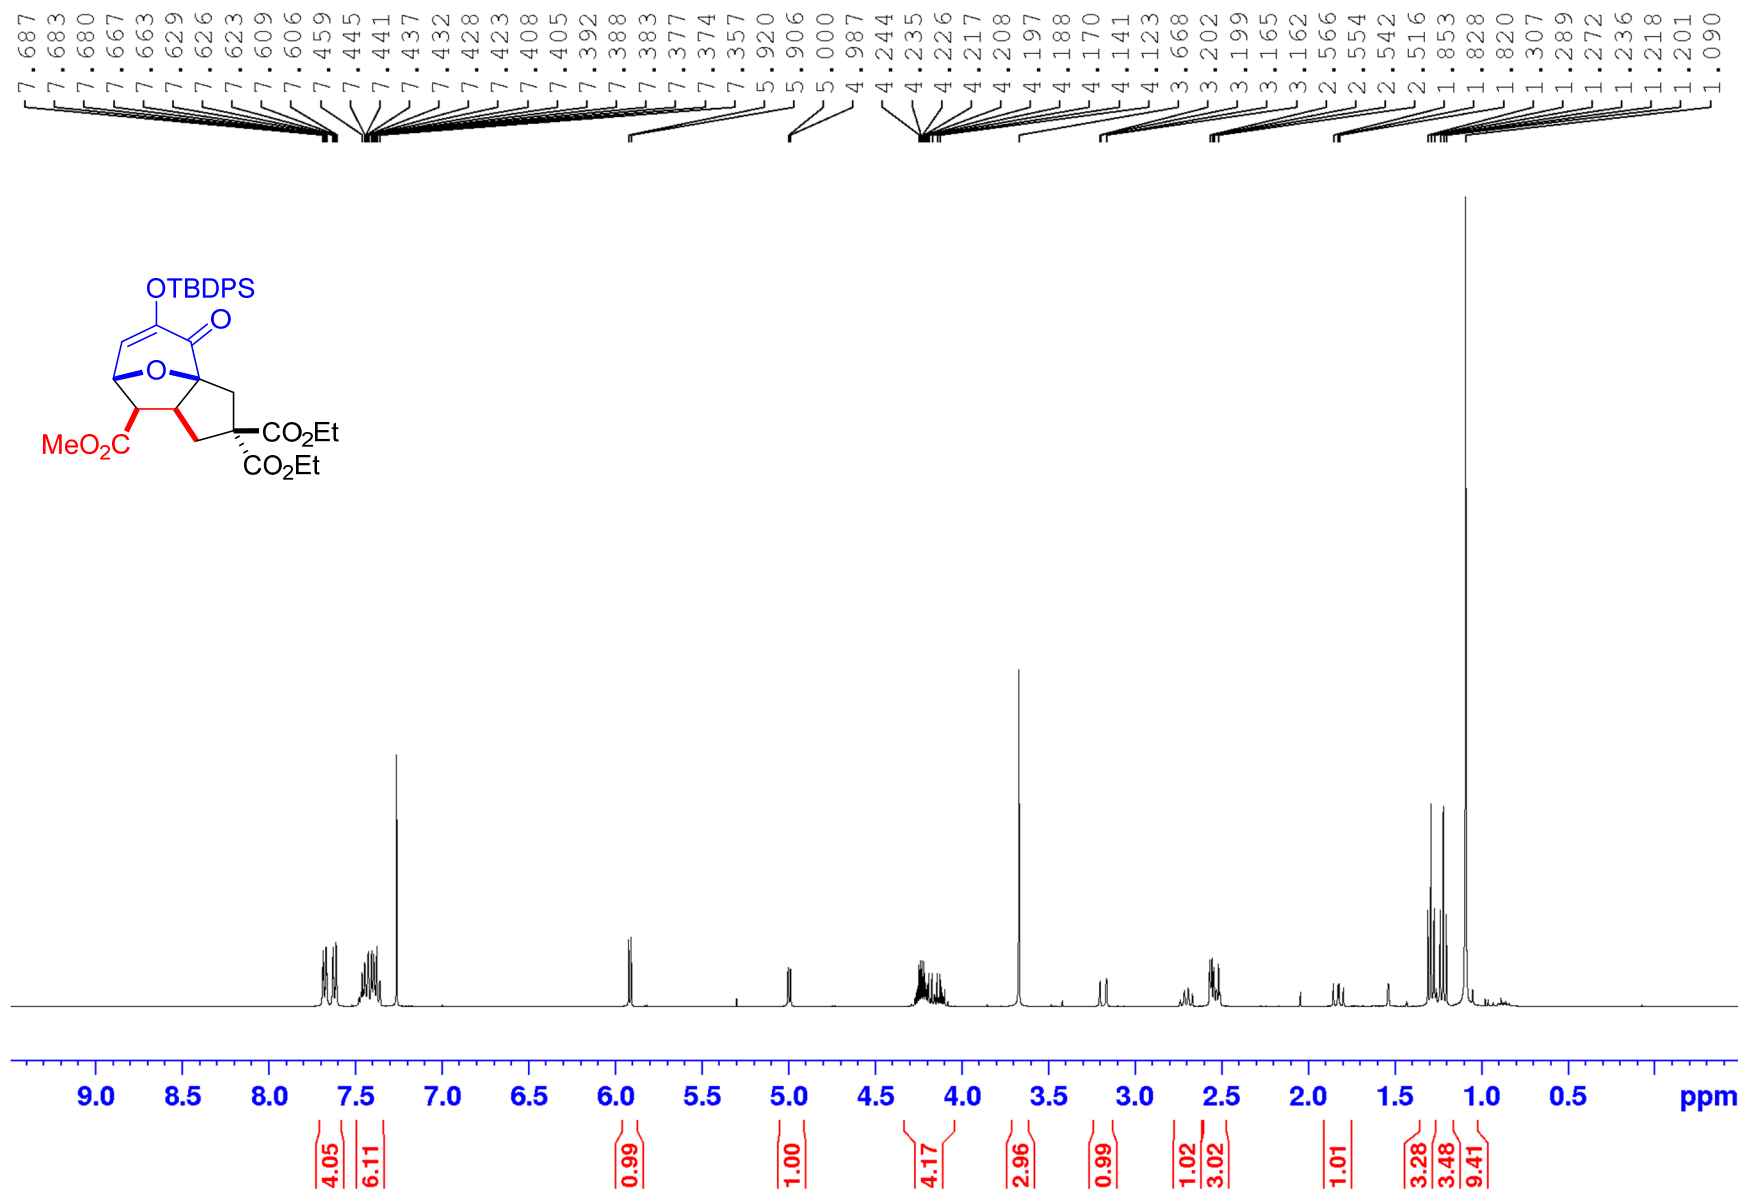

<sup>1</sup>H NMR (400 MHz) of *cis*-2g in CDCl<sub>3</sub>

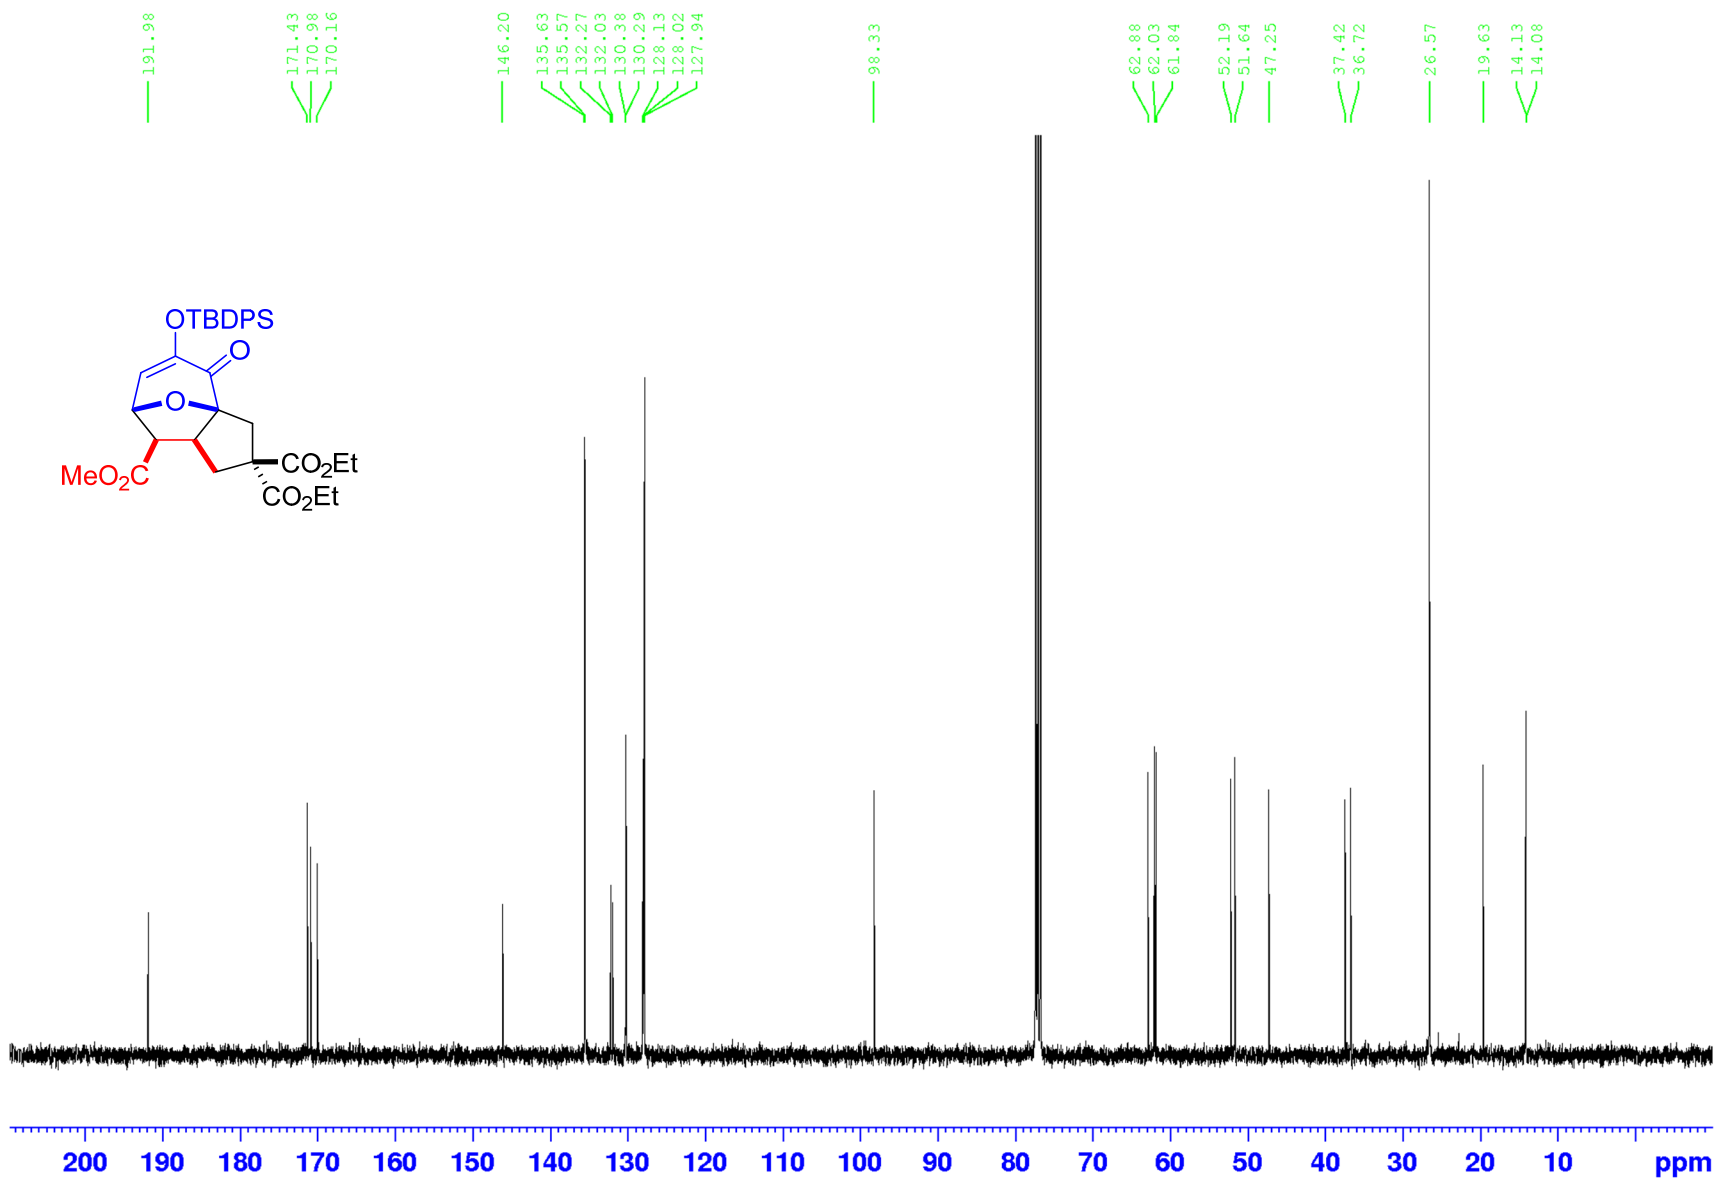

<sup>13</sup>C{<sup>1</sup>H} NMR (100 MHz) of *cis*-2g in CDCl<sub>3</sub>
